# Supplementary material for: Broadening substrate specificity of a chain-extending ketosynthase through a single active-site mutation
Source: Royal Society of Chemistry journal article supplement (doi:10.1039/c6cc03501a), 2016-01-01
Supplement: c6cc03501a1.pdf [file c6cc03501a1.pdf]

## Supplementary Information

### Broadening substrate specificity of a chain-extending ketosynthase through a single active-site mutation

Annabel C. Murphy, Hui Hong, Steve Vance, R. William Broadhurst and Peter F. Leadlay

|                                                                                |           |
|--------------------------------------------------------------------------------|-----------|
| <b>General Analytical Procedures</b>                                           | <b>2</b>  |
| <b>Bacterial strains and culture conditions</b>                                | <b>2</b>  |
| <b>Materials, DNA isolation and manipulation</b>                               | <b>2</b>  |
| <b>Model generation</b>                                                        | <b>3</b>  |
| <b>Protein expression and purification</b>                                     | <b>3</b>  |
| <b>Chemical synthesis</b>                                                      | <b>4</b>  |
| <b>Condensation assays using methylmalonyl-CoA</b>                             | <b>5</b>  |
| <b>Malonylation of EryACP3 with MlsAT9</b>                                     | <b>6</b>  |
| <b>Condensation assays using malonyl-CoA</b>                                   | <b>6</b>  |
| <b>Condensation assays using alkyl-ACP as an internal standard</b>             | <b>6</b>  |
| <b>Time course assays for wild type and Ala154Trp eryKS3AT3</b>                | <b>7</b>  |
| <b>Data analysis</b>                                                           | <b>7</b>  |
| <b>Table S1. Oligonucleotide primers used in this work</b>                     | <b>9</b>  |
| <b>Table S2. ESI-MS analysis of proteins</b>                                   | <b>10</b> |
| <b>Table S3. Summary of EryACP3 condensation products</b>                      | <b>14</b> |
| <b>Table S4. Condensation assays using malonyl-CoA</b>                         | <b>17</b> |
| <b>Figure S1. KS domain sequence alignment</b>                                 | <b>11</b> |
| <b>Figure S2. EryKS3AT3 crystal structure and Phyre model comparison</b>       | <b>12</b> |
| <b>Figure S3. Sequence variability in <i>cis</i>-AT PKS domains</b>            | <b>13</b> |
| <b>Figure S4. SDS-PAGE analysis</b>                                            | <b>13</b> |
| <b>Figure S5. Selected MS analyses</b>                                         | <b>15</b> |
| <b>Figure S6. Time course</b>                                                  | <b>16</b> |
| <b>Figure S7. Malonylation of EryACP3 using MlsAT9</b>                         | <b>16</b> |
| <b>Figure S8. Dimer interface loop location</b>                                | <b>18</b> |
| <b>Figure S9. Sequence alignment of PKS type I <i>cis</i>-AT ketosynthases</b> | <b>19</b> |
| <b>References</b>                                                              | <b>41</b> |

## **General Analytical Procedures**

HPLC-MS analysis was performed using an HPLC (Hewlett Packard, Agilent Technologies 1100 series) coupled to a Finnigan MAT LCQ mass spectrometer fitted with an electrospray ionization (ESI) source. The HPLC was fitted with a Jupiter 5 $\mu$  C4 column (2.0 x 250 mm, Phenomenex). A solvent system of CH<sub>3</sub>CN and H<sub>2</sub>O, both containing 0.1% trifluoroacetic acid, was used. Samples were eluted at a flow rate 0.3 mL min<sup>-1</sup> with a linear gradient of 5 to 45% CH<sub>3</sub>CN over 5 min, followed by 45 to 55% CH<sub>3</sub>CN over 13 min, then 55 to 95% CH<sub>3</sub>CN over 2 min and finally 95% CH<sub>3</sub>CN over 4 min. The mass spectrometer was run in positive ionization mode, scanning from m/z 200 to 2000, and the collision energy was set to 35%. HPLC-MS data were processed using Xcalibur (version 1.1, Thermo Finnigan) and deconvolution of the various charge states observed was carried out using Promass 2.8 (Novatia).

DNA sequencing was carried out by the DNA Sequencing Facility in the Department of Biochemistry, University of Cambridge. High resolution mass spectroscopy was carried out using positive ion electrospray ionization on a Thermo Fisher Orbitrap Mass Spectrometer.

## **Bacterial strains and culture conditions**

*E. coli* strains (DH10B and BL21 DE3) were grown in Luria-Bertani (LB) broth (1% tryptone, 0.5% yeast extract, 1% NaCl) or on LB agar (1% tryptone, 0.5% yeast extract, 1% NaCl, 1.5% agar) at 37 °C with kanamycin selection (50  $\mu$ g mL<sup>-1</sup>).

## **Materials, DNA isolation and manipulation**

Oligonucleotides used in this work are summarised in Table S1. Restriction endonucleases (Fast Digest) and Pfu DNA polymerase were purchased from Thermo Scientific, shrimp alkaline phosphatase was purchased from USB, T4 DNA ligase was purchased from New England Biolabs. Chemicals were from Sigma-Aldrich. Plasmid DNA was isolated from an overnight culture using the Plasmid Mini Kit I (Omega BioTek). Purification of DNA fragments from agarose gels was performed using the Anachem Gel Recovery Kit, then concentrated using the Zymo DNA Clean and Concentrator kit. PCR amplifications were carried out using a Mastercycler (Eppendorf) and the Phusion High-Fidelity PCR Master Mix (GC buffer) from New England Biolabs, with a final concentration of DMSO of 3-4%.

A C-terminal His-tag EryKS3AT3 was generated by amplification using the primers given in Table S1. The PCR product was digested with NdeI and EcoRI, purified by agarose gel, extracted and concentrated. This fragment was then ligated into pET29b that had been previously digested with the same restriction enzymes and shrimp alkaline phosphatase, purified by agarose gel, extracted and concentrated. The same protocol was used to clone EryACP3 into pET28a to generate EryACP3 with an N-terminal His-tag. The MlsAT9 gene was cloned into a pET28a(TEV) (N-terminal sequence: MGSSHHHHHSSGENLYFQG) using the primers given in Table S1 by one step, isothermal Gibson Assembly.<sup>[1]</sup>

For general DNA manipulations, *E. coli* strain DH10B was used, while for protein expression *E. coli* strain BL21 DE3 was used. Chemically competent cells were generated using calcium chloride and then transformed with the plasmids described above, and selected on LB agar plates containing kanamycin (50 µg mL<sup>-1</sup>).

Site-directed mutagenesis was carried out using the Quikchange method (Stratagene) with inclusion of DMSO at 6% and the primers given in Table S1.

### **Model generation**

The amino acid sequence of the 16 MLS KS domains were aligned with the KS domain of DEBS module 3 and a sequence identity of 63% was found (excluding the DEBS N-terminal docking domain). An *in silico* model of the KS from MlsA2 was generated using Phyre2 and iTASSER.<sup>[2,3]</sup> Beyond minor differences in side-chain placement, the programs generated very similar models of the active site and the Phyre2 model was then compared with the EryKS3AT3 didomain crystal structure.

### **Protein expression and purification**

Expression of EryKS3AT3 and all mutant variants was carried out in 150 mL LB in 500 mL Ultra Yield flasks (Thompson) with kanamycin selection and, after incubation at 37 °C until an OD<sub>500</sub> of 0.6, the culture was cooled to 22 °C and induced with IPTG (0.2 mM) for 16 h. Purification was then carried out by incubating the lysed cell supernatant (10 mM imidazole, 50 mM sodium phosphate pH 7.2, 300 mM NaCl) with Ni-NTA resin at 4 °C for 1 hour, washing with 10 column volumes of the above loading buffer, then eluting with 150 mM imidazole, 50 mM sodium phosphate pH 7.2, 300 mM NaCl. Preparative gel filtration using Sephadex S200 (column volume approximately 120 mL) and eluting with 100 mM sodium

phosphate buffer at pH 7.2 was carried out, followed by concentration of the resulting protein using Amicon Ultra-4 30 kDa cutoff spin concentrators (Millipore) to an approximate concentration of 30  $\mu$ M.

The same protocol was used for apo-EryACP3 except that expression was carried out using a 500 mL LB culture in a 2L baffled flask, and elution was carried out using 500 mM imidazole, 50 mM sodium phosphate pH 7.2, 300 mM NaCl. After desalting into 100 mM sodium phosphate buffer (pH 7.2) using a PD10 cartridge (GE life sciences), the apo-EryACP3 was phosphopantetheinylated *in vitro* by incubation with sfp from *Bacillus subtilis*,<sup>[4]</sup> (8  $\mu$ M), MgCl<sub>2</sub> (1 mM), DTT (5 mM) and coenzyme A (1 mM) at 37 °C for 1 h. Thrombin digestion was carried out as follows to simplify mass spectral analysis of the protein, by removing partial glucuronidation post-translational modification.<sup>[5]</sup> Thrombin (10  $\mu$ M, from bovine plasma, Sigma) was added to the above mixture and the reaction was incubated for a further 16 h at room temperature. The holo-EryACP3 was then purified using preparative gel filtration using Sephadex S200 and eluting with 100 mM sodium phosphate buffer at pH 7.2, then concentrated using an Amicon Ultra-4 3 kDa cutoff spin concentrator (Millipore). MIsAT9 was expressed and purified by Ni-affinity chromatography following the same protocol as EryACP3. Gel filtration was carried out on Superdex75 (10/300) column (GE Healthcare) in 50 mM sodium phosphate pH 7.5, 150 mM NaCl. The purified protein was concentrated using a 10 kDa cutoff PES Vivaspin spin concentrator (Sartorius) to a concentration of 50  $\mu$ M. Protein concentration of all EryKS3AT3 variants ( $\Sigma$  91890 M<sup>-1</sup>cm<sup>-1</sup>) and MIsAT9 ( $\Sigma$  31400 M<sup>-1</sup>cm<sup>-1</sup>) was estimated using absorbance at 280 nm, while that of EryACP3 was estimated using amino acid analysis and Bradford's method.<sup>[6]</sup> All EryKS3AT3 variants were freshly expressed, purified and stored for a maximum of 3 days at 4 °C prior to use, while EryACP3 was diluted to give a final glycerol concentration of 20%, flash frozen and stored for up to 2 months at -80 °C.

### Chemical Synthesis

*N*-acetylcysteamine substrates **3-19** were prepared using the standard procedure described below, or according to literature procedures, and their identity was confirmed by comparison with literature values, except **7**, **10** and **13**, for which data are given below.<sup>[7-14]</sup> The appropriate carboxylic acid was dissolved in anhydrous DCM, cooled on ice, and 1-ethyl-3-(3-dimethylaminopropyl)carbodiimide (1.1 eq) and dimethylaminopyridine (0.2 eq) were

added. After stirring on ice for 15 minutes, cysteamine (1.1 eq) was added, the reaction was allowed to warm to room temperature and stirred for 16 hours. After removal of the solvent *in vacuo*, the residue was dissolved in chloroform and washed with 0.1 M HCl followed by brine, and the organic layer was dried over MgSO<sub>4</sub>. After removal of the solvent *in vacuo*, the residue was purified by silica chromatography using mixtures of petroleum ether and ethyl acetate.

**7** 96%, colourless oil, R<sub>f</sub> 0.13 (60:40 EtOAc:petroleum ether), δ<sub>H</sub> (CDCl<sub>3</sub>, 400 MHz) 3.41 (2H, q, 6.3 Hz), 3.00 (2H, t, 6.3 Hz), 2.57 (1H, sex, 6.9 Hz), 1.94 (3H, s), 1.71 (1H, m), 1.46 (1H, m), 1.14 (3H, d, 6.9 Hz), 0.89 (3H, t, 7.3 Hz); δ<sub>C</sub> (CDCl<sub>3</sub>, 100 MHz) 204.5, 170.2, 50.1, 39.8, 28.1, 27.1, 23.1, 17.1, 11.5; *m/z* = 204.1051 [M+H]<sup>+</sup>, 1 ppm (204.1053 calcd for C<sub>9</sub>H<sub>18</sub>O<sub>2</sub>N<sup>32</sup>S);

**10** 73%, yellow oil, R<sub>f</sub> 0.13 (60:40 EtOAc:petroleum ether), δ<sub>H</sub> (CDCl<sub>3</sub>, 400 MHz) 6.86 (1H, q, 7.1 Hz), 3.44 (2H, q, 6.0 Hz), 3.06 (2H, t, 6.4 Hz), 1.95 (3H, s), 1.87 (3H, br s), 1.83 (3H, d, 7.1 Hz); δ<sub>C</sub> (CDCl<sub>3</sub>, 100 MHz) 193.8, 170.2, 136.84, 136.78, 39.8, 28.3, 23.2, 14.4, 12.1; *m/z* = 202.0893 [M+H]<sup>+</sup>, 2 ppm (202.0896 calcd for C<sub>9</sub>H<sub>16</sub>O<sub>2</sub>N<sup>32</sup>S);

**13** 73%, white powder, R<sub>f</sub> 0.14 (60:40 EtOAc:petroleum ether), δ<sub>H</sub> (CDCl<sub>3</sub>, 400 MHz) 6.89 (1H, dd, 15.4, 6.6 Hz), 6.07 (1H, dd, 15.4, 1.5 Hz), 3.45 (2H, q, 6.0 Hz), 3.08 (2H, t, 6.4 Hz), 2.46 (1H, m), 1.96 (3H, s), 1.07 (6H, d, 6.8 Hz); δ<sub>C</sub> (CDCl<sub>3</sub>, 100 MHz) 190.7, 170.3, 153.6, 125.7, 39.8, 31.0, 28.3, 23.2, 21.1; *m/z* = 216.1052 [M+H]<sup>+</sup>, 0.3 ppm (216.1053 calcd for C<sub>10</sub>H<sub>18</sub>O<sub>2</sub>N<sup>32</sup>S).

*N*-acylcysteamine substrate stock solutions used: **18-20** were dissolved at 60 mM in water, **6** was dissolved at 60 mM in DMSO and all other substrates were dissolved at 300 mM in DMSO.

### Condensation assays using methylmalonyl-CoA

Methyl malonyl coenzyme A (1 mM), tris(2-carboxyethyl)phosphine (500 μM), EryACP3 (30 μM) and EryKS3AT3 or its mutants (3 μM) were incubated in sodium phosphate buffer (100 mM, pH 7.2) for 30 mins at room temperature. *N*-acetylcysteamine substrates (6 mM) were then added and the reaction incubated at room temperature for a further hour. These reactions were carried out on a 10 μL scale, and were then quenched with 40 μL 0.1% aqueous TFA and the samples were analyzed by LCMS within 16 hours (stored at 10 °C). The reaction conditions used for **6** were adjusted to minimise precipitation observed on addition of the substrate. Methyl malonyl coenzyme A (0.4 mM), tris(2-carboxyethyl)phosphine (200

$\mu\text{M}$ ), EryACP3 (12  $\mu\text{M}$ ) and EryKS3AT3 or its mutants (1.2  $\mu\text{M}$ ) were incubated in sodium phosphate buffer (100 mM, pH 7.2) for 1 hour at room temperature. **6** (3 mM) was added and the reaction incubated at room temperature for one hour. The reaction was carried out on a 25  $\mu\text{L}$  scale, then quenched with 25  $\mu\text{L}$  0.1% aqueous TFA and analyzed by LCMS as described in the general analytical procedures.

#### **Malonylation of EryACP3 with MIsAT9**

Malonyl coenzyme A (1 mM), tris(2-carboxyethyl)phosphine (5 mM), EryACP3 (30  $\mu\text{M}$ ) and MIsAT9 (3 $\mu\text{M}$ ) were incubated in sodium phosphate buffer (100 mM, pH 7.2) for 1 hour at room temperature, then quenched and analysed as above (Figure S2b). A control reaction lacking the MIsAT9 was carried out (Figure S2a). To confirm that the reaction proceeds in the presence of EryKS3AT3, the above reaction was repeated with the addition of EryKS3AT3 (3  $\mu\text{M}$ ), and to confirm EryKS3AT3 cannot use malonyl coenzyme A as a substrate the above reaction was carried out with EryKS3AT3 (3  $\mu\text{M}$ ) in place of MIsAT9 (Figures S2c and S2d).

#### **Condensation assays using malonyl-CoA**

Malonyl coenzyme A (1 mM), tris(2-carboxyethyl)phosphine (500  $\mu\text{M}$ ), EryACP3 (30  $\mu\text{M}$ ) and MIsAT9 (3 $\mu\text{M}$ ) were incubated in sodium phosphate buffer (100 mM, pH 7.2) for 30 mins at room temperature. *N*-acetylcysteamine substrates (6 mM) and EryKS3AT3 or its mutants (3  $\mu\text{M}$ ) were then added and the reaction incubated at room temperature for a further hour. These reactions were carried out on a 10  $\mu\text{L}$  scale, and were quenched and analyzed as for the methylmalonyl condensation assay above. The reaction conditions used for **6** were adjusted as above; malonyl coenzyme A (0.4 mM), tris(2-carboxyethyl)phosphine (200  $\mu\text{M}$ ), EryACP3 (12  $\mu\text{M}$ ) and MIsAT9 (1.2  $\mu\text{M}$ ) were incubated in sodium phosphate buffer (100 mM, pH 7.2) for 1 hour at room temperature. **6** (3 mM) and EryKS3AT3 or its mutants (1.2  $\mu\text{M}$ ) were added and the reaction incubated at room temperature for one hour. The reaction was carried out on a 25  $\mu\text{L}$  scale, then quenched with 25  $\mu\text{L}$  0.1% aqueous TFA and analyzed as above.

#### **Condensation assays using alkyl-ACP as an internal standard**

EryACP3 was alkylated with iodoacetamide following the protocol described by Jenner *et al.*<sup>[15]</sup> Methyl malonyl coenzyme A (1 mM), tris(2-carboxyethyl)phosphine (500  $\mu\text{M}$ ),

EryACP3 (30  $\mu\text{M}$ ) and wild type or Ala154Trp EryKS3AT3 (3  $\mu\text{M}$ ) were incubated in sodium phosphate buffer (100 mM, pH 7.2) for 30 mins at room temperature. *N*-acetylcysteamine substrates (6 mM) were then added and the reaction incubated at room temperature for a further hour (10  $\mu\text{L}$  final volume). The reactions were quenched with 40  $\mu\text{L}$  0.1% aqueous TFA, alkylated EryACP3 was added to a final concentration of 6  $\mu\text{M}$  and samples were analyzed by LCMS as described in the general analytical procedures.

### Time course assays for wild type and Ala154Trp eryKS3AT3

Methyl malonyl coenzyme A (1 mM), tris(2-carboxyethyl)phosphine (500  $\mu\text{M}$ ), EryACP3 (30  $\mu\text{M}$ ) and wild type EryKS3AT3 or Ala154Trp (3  $\mu\text{M}$ ) were incubated in sodium phosphate buffer (100 mM, pH 7.2) at room temperature for 30 mins. Substrate **4** (6 mM) was added and aliquots (10  $\mu\text{L}$ ) were then extracted at various time points, quenched with 40  $\mu\text{L}$  0.1% aqueous TFA and analyzed by LCMS within 16 hours (stored at 10  $^{\circ}\text{C}$ ). No significant side reactions were observed on this occasion, and since the condensation product peak was well resolved from the holo/methylmalonyl peak, estimation of peak areas was carried out spectrophotometrically (210 nm) rather than by deconvolution of LCMS data. Data was then fitted to equation 1 using OriginPro 8.<sup>[16]</sup> Wild type EryKS3AT3 had a  $v_0$  value of  $10.6 \pm 0.4$   $\text{mMs}^{-1}$  and an  $\eta$  value of  $0.009 \pm 0.001$   $\text{s}^{-1}$ , while Ala154Trp had a  $v_0$  value of  $47.2 \pm 0.8$   $\text{mMs}^{-1}$  and an  $\eta$  value of  $0.048 \pm 0.001$   $\text{s}^{-1}$ .

$$[P] = \frac{v_0}{\eta} (1 - e^{-\eta t}) \quad (1)$$

### Data analysis

The EryKS3AT3 and its mutants had an approximate retention time of 16 mins, all EryACP3 derivatives had retention times between approximately 17 and 23 mins, and MIsAT9 had a retention time of 24 mins. To allow quantification of the various EryACP3 derivatives formed during the reaction, deconvolution was carried out on the mass spectrum generated by summing all data after the EryKS3AT3, or its mutants, had been eluted and before elution of MIsAT9. The proportions of each EryACP3 derivative present were then analyzed (with a possible output range of 9000-13000 Da). In those cases where very low levels of condensation product were obtained, deconvolution of the peak containing the

condensation product was carried out to confirm its presence, and a yield of <1% was quoted. For EryKS3AT3 and all mutants, with the exception of A<sub>154</sub>W, the most abundant ACP derivatives observed were the holo-ACP (M<sub>w</sub> 10477) and methylmalonyl-loaded ACP (M<sub>w</sub> 10577). Other commonly observed minor derivatives were propionoyl loaded ACP, presumed to be formed by spontaneous decarboxylation of methylmalonyl loaded ACP (M<sub>w</sub> 10533), and ethyl loaded ACP formed by decarboxylation of malonyl loaded ACP (M<sub>w</sub> 10519), oxidised holo-ACP (M<sub>w</sub> 10493) and methylmalonyl-loaded ACP (M<sub>w</sub> 10593), presumed to be oxidized on one of the two methionine side chain sulfurs, and holo-ACP that has formed a disulfide bridge with an additional molecule of coenzyme A (M<sub>w</sub> 11240). Acylation of the unloaded holo-EryACP3 via a (non-enzyme catalyzed) trans-thioesterification reaction with the *N*-acetylcysteamine substrates was commonly observed in small quantities, while for  $\alpha,\beta$ -unsaturated *N*-acetylcysteamine substrates, ACP derivatives derived from conjugate addition of the phosphopantetheine sulfur to the substrate was often a major product of the reaction (up to 77%). Neither of these reactions was observed for the apo-EryACP3. For one batch of EryACP3, a holo-ACP + 32 Da derivative was observed (M<sub>w</sub> 10507), presumed to represent a doubly oxidised phosphopantetheine sulphur (sulfinic acid), due to the absence of a methylmalonyl loaded equivalent. While the reducing agent TCEP was included to reduce the formation of holo-ACP dimers, its concentration was minimized to avoid its conjugate addition onto Claisen condensation products when  $\alpha,\beta$ -unsaturated SNAc substrates were employed.



**Table S2. ESI-MS analysis of proteins**

*Primers for cloning EryKS3AT3 and EryACP3*

EryKS3AT3 Fwd ATATATAT**CATATG**ACTGACAGCGAGAAGGTGG  
EryKS3AT3 Rev TATATATAG**AAATTC**GCCCTTACGCGGTAGGCCAGCTCGTC  
EryACP3 Fwd ATATATAT**CATATG**CGGCTCGCGGGGCTTTCC  
EryACP3 Rev TATATATAG**AAATTC**TTAGGCGTCACCGACGAGCCGGGC

*Primers used for cloning of MlsAT9*

MlsAT9 Fwd  
AGCAGCGGCGAAAACCTGTATTTTCAGGGCCCCGACACCACACAAACC  
MlsAT9 Reverse GCCAACTCAGCTTCCTTTCCGGGCTTTGTTAGAAAGCGTAGGTGGGCAGTG  
pET28a(TEV) Fwd TAACAAAGCCCGAAAGGAAGC  
pET28a(TEV) Rev GCCCTGAAAATACAGGTTTTTCG

*Primers used for quikchange mutagenesis of EryKS3AT3*

A<sub>154</sub>G sense CTTCTCGGAGTGG**G**GAAGTTCGGCTACG  
A<sub>154</sub>G antisense CGTAGCCGAAC**T**CCCCACTCCGAGGAAG  
A<sub>154</sub>W sense GTCTTCTCGGAGT**G**TGAAGTTCGGCTACGG  
A<sub>154</sub>W antisense CCGTAGCCGAAC**T**CC**A**CACTCCGAGGAAGAC  
K<sub>155</sub>A sense CCTCGGAGTGGCG**G**CGTTCGGCTACGGC  
K<sub>155</sub>A antisense GCCGTAGCCGAAC**G**CCGCCACTCCGAGG  
F<sub>156</sub>Q sense CTCGGAGTGGCGAAG**CA**AGGCTACGGCGAGGAC  
F<sub>156</sub>Q antisense GTCCTCGCCGTAGC**T**T**G**CTTCGCCACTCCGAG  
V<sub>173</sub>M sense CGAGGGCTACTCG**A**T**G**ACCGGTGTGGCGC  
V<sub>173</sub>M antisense GCGCCACACCGGT**C**ATCGAGTAGCCCTCG  
A<sub>230</sub>T sense TCGGCGGTGCC**A**CGGTGATGGCG  
A<sub>230</sub>T antisense CGCCATCACCGTGGCACCGCCGA  
F<sub>263</sub>T sense CGGCGCCGACGGG**A**CCGGCTTCTCCGAA  
F<sub>263</sub>T antisense TTCGGAGAAGCC**G**TCCCGTCGGCGCCG  
F<sub>265</sub>W sense GCCGACGGGTTCCGGCT**G**G**T**CCGAAGGCGT  
F<sub>265</sub>W antisense ACGCCTTCGG**A**CCAGCCGAACCCGTCGGC

**Table S2. ESI-MS analysis of proteins**

|                    | Calculated |       | Observed |       |
|--------------------|------------|-------|----------|-------|
|                    | + Met      | - Met | + Met    | - Met |
| EryKS3AT3          | 99989      | 99857 | 99992    | 99870 |
| holo-EryACP3       | 10477      | -     | 10477    | -     |
| A <sub>154</sub> G | 99975      | 99843 | 99996    | 99878 |
| A <sub>154</sub> W | 100104     | 99972 | 100094   | 99973 |
| K <sub>155</sub> A | 99932      | 99800 | 99940    | 99802 |
| F <sub>156</sub> Q | 99970      | 99838 | 99957    | 99837 |
| A <sub>230</sub> T | 100019     | 99887 | 100011   | 99890 |
| F <sub>263</sub> T | 99943      | 99811 | 99928    | 99803 |
| F <sub>265</sub> W | 100028     | 99896 | 100050   | 99909 |
| MIsAT9             | -          | 52288 | -        | 52279 |

Values for proteins with (+ Met) and without (-Met) an N-terminal methionine are given

**Figure S1. KS domain sequence alignment** Sequence alignment of KS domains of known structure with a representative mycolactone KS domain. The positions of variable surface loops identified in X-ray crystal structures<sup>[17–21]</sup> are highlighted with the ‘outer clamping loop’ in yellow, the ‘dimer interface loop’ in blue and the ‘active site cap’ in red. Regions previously identified as involved in ACP docking events<sup>[22]</sup> are outlined in yellow for the "upstream" ACP and green for the intramodular ACP. Residues identified as possible specificity determinants<sup>[17]</sup> are highlighted with a closed circle. Residues that when mutated obstruct the intramodular ACP docking region<sup>[22]</sup> are indicated with open triangles. The seven EryKS3 residues mutated in this work are indicated with asterisks.

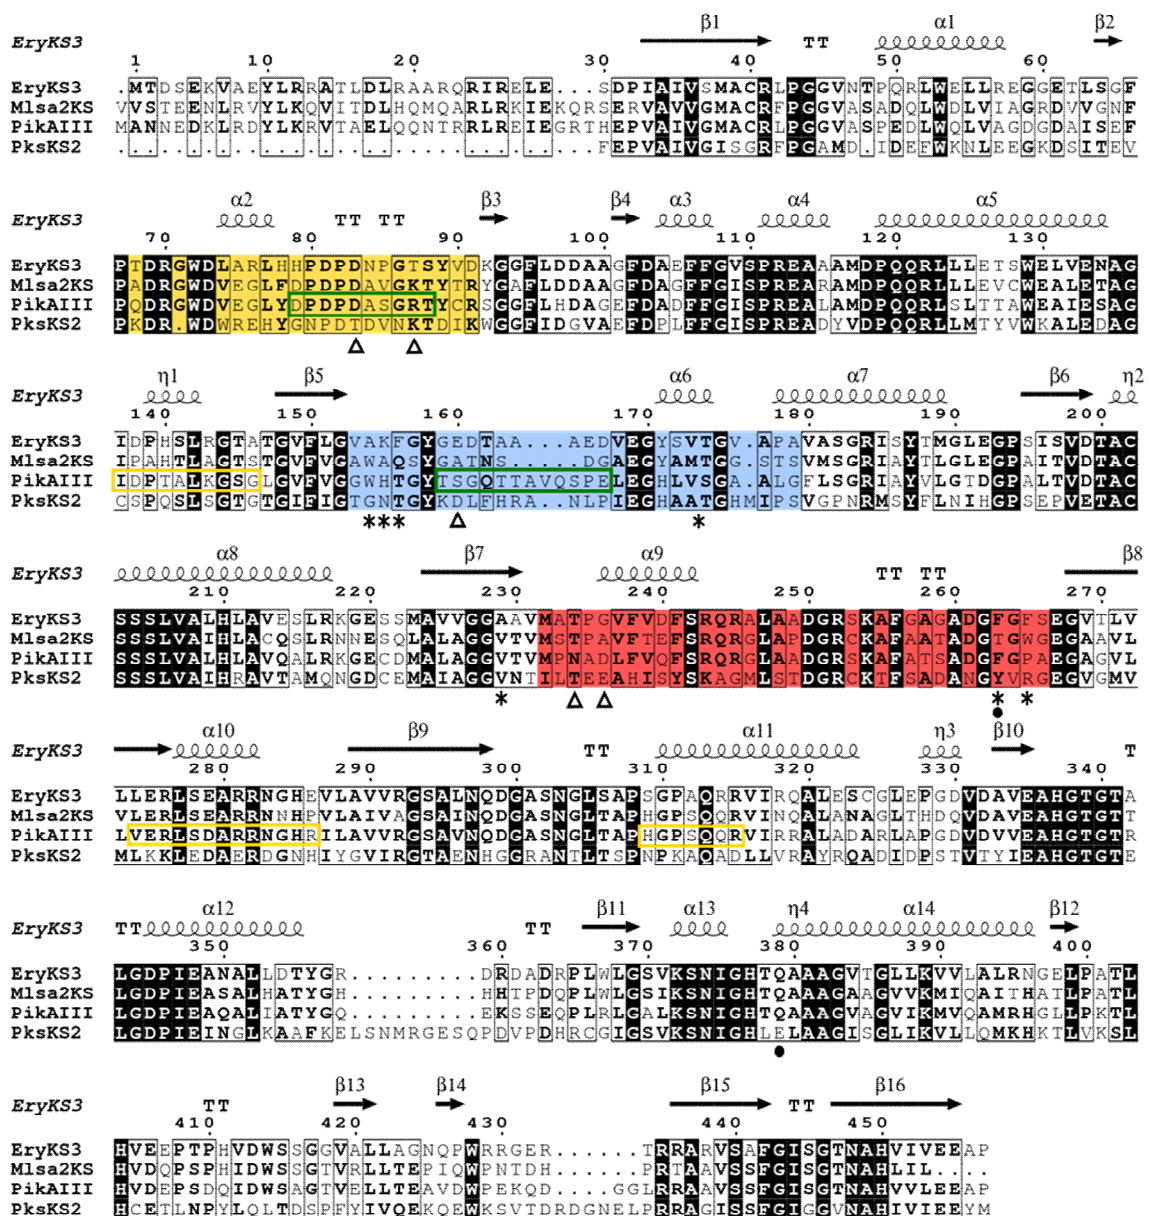

**Figure S2. EryKS3AT3 crystal structure and Phyre model comparison** Active site residues chosen for mutagenesis in the ketosynthase (KS) domain of Ery PKS (DEBS) module 3 (PDB accession number 2QO3) based on comparison with a Phyre2<sup>[2]</sup> model of a representative mycolactone PKS KS (MlsA2). Conserved active site residues are shown in yellow (EryKS) or orange (MlsA2) while those that differ are shown in blue (EryKS) or green (MlsA2). Residue Val173' lies at the KS-AT dimer interface and is contributed by the other subunit. The catalytic triad is shown in red and electron density observed for the ketosynthase inhibitor cerulenin bound to the catalytic Cys is shown in purple.

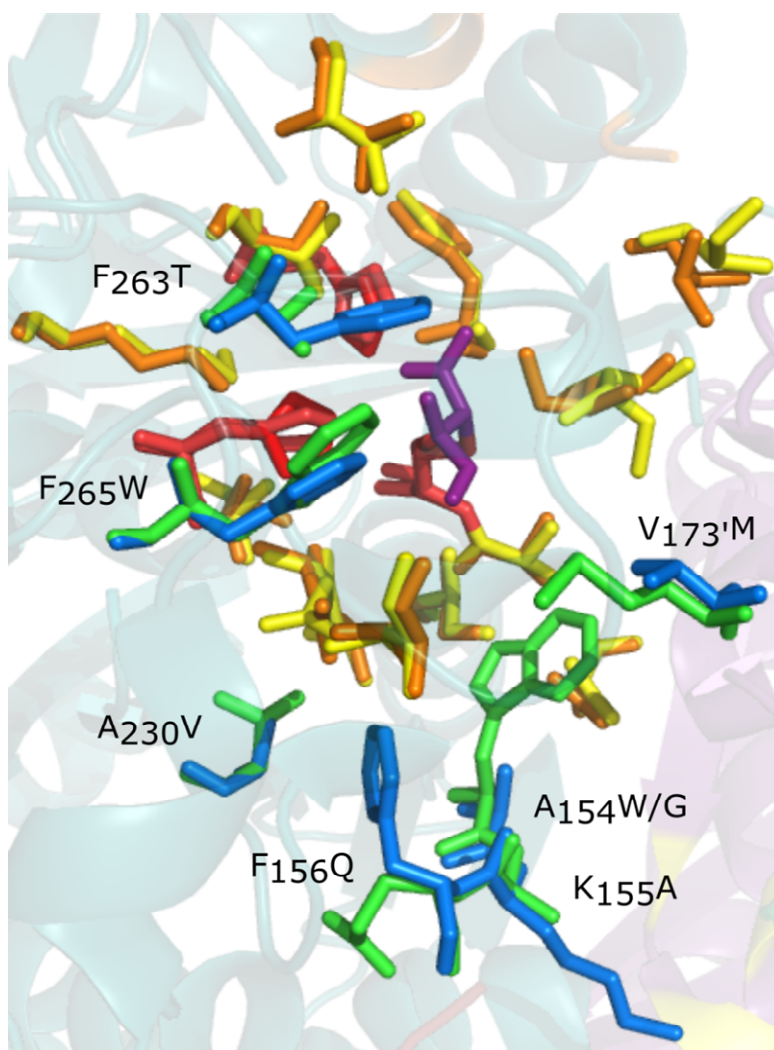

**Figure S3. Sequence variability in *cis*-AT PKS domains.** The percentage of sequences from 199 aligned PKS domains that have the consensus residue at each position is plotted against residue number. The regions shown in colour correspond to "variable surface loops" identified in X-ray crystal structures of both *trans*-AT and *cis*-AT KS domains.<sup>25,28-31</sup> Yellow = outer clasping loop; blue = dimer interface loop; and red = active site cap.

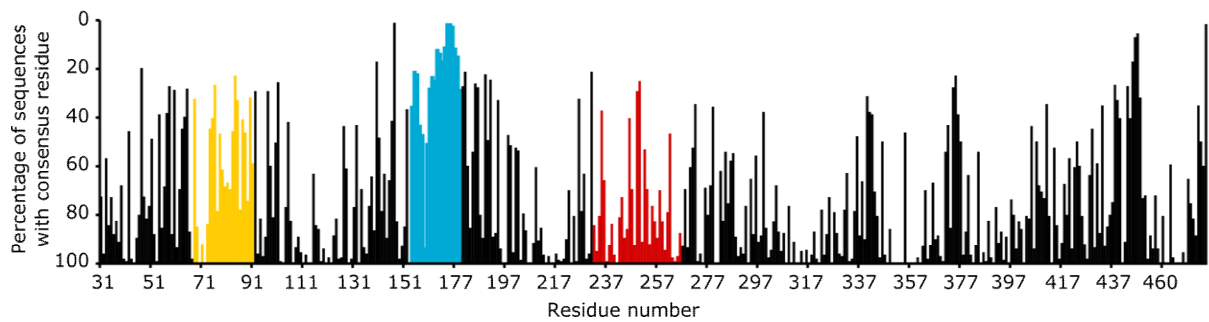

**Figure S4. SDS-PAGE analysis of proteins (4-12% Bis-Tris)**

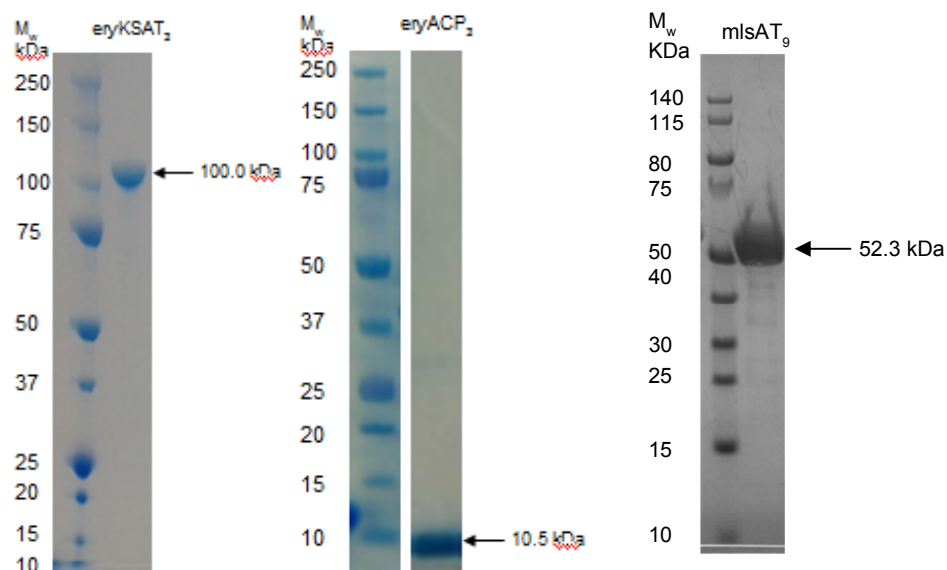

**Table S3 Summary of EryACP3 condensation products**

| <u>Substrate</u> | <u>R<sub>t</sub> (mins)</u> | <u>Methyl malonyl (Da)</u> | <u>Malonyl (Da)</u> |
|------------------|-----------------------------|----------------------------|---------------------|
| <b>3</b>         | 18.5                        | 10604                      | 10590               |
| <b>4</b>         | 19.0                        | 10618                      | 10604               |
| <b>5</b>         | 21.0                        | 10660                      | 10646               |
| <b>6</b>         | 22.8                        | 10688                      | 10674               |
| <b>7</b>         | 18.8                        | 10618                      | 10604               |
| <b>8</b>         | 19.4                        | 10644                      | 10630               |
| <b>9</b>         | 18.0                        | 10602                      | 10588               |
| <b>10</b>        | 18.4                        | 10618                      | 10604               |
| <b>11</b>        | 18.6                        | 10616                      | 10602               |
| <b>12</b>        | 19.1                        | 10630                      | 10616               |
| <b>13</b>        | 19.1                        | 10630                      | 10616               |
| <b>14</b>        | 18.7                        | 10628                      | 10614               |
| <b>18-20</b>     | 17.8                        | 10646                      | 10632               |

**Figure S5.** Selected MS analyses of KS-catalysed production of  $\beta$ -ketoacyl-EryACP3. EryACP3 after incubation with methylmalonyl-CoA (MeMal-CoA), substrate **6** and (A) wild type EryKS3AT3 or (B) Ala154Trp; ACP3 after incubation with MeMal-CoA, substrate **11** and (C) wild type EryKS3AT3 or (D) Ala154Trp; ACP3 after incubation with MeMal-CoA, substrate **13** and (E) wild type EryKS3AT3 or (F) Ala154Trp; ACP3 after incubation with MeMal-CoA, substrate **14** and (G) EryKS3AT3 or (H) Ala154Trp. Claisen condensation products for the respective substrates are shown in green, while side products (non-enzyme catalysed) arising from thioester exchange of ACP with SNAc substrate and conjugate addition of ACP onto  $\alpha,\beta$ -unsaturated thioester substrates are shown in purple and orange respectively. An alkylated ACP used as an internal standard is shown in yellow.

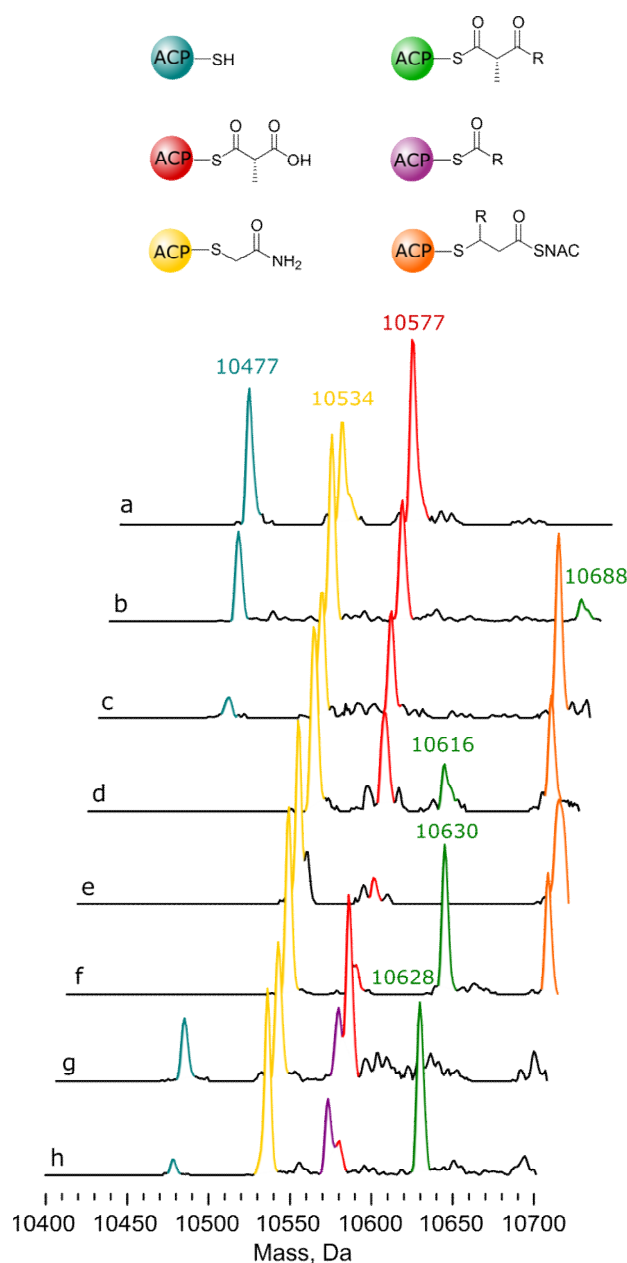

**Figure S6.** Time course of condensation of **4** with methylmalonyl-ACP, catalysed by wild type EryKS3AT3 and mutant Ala154Trp.

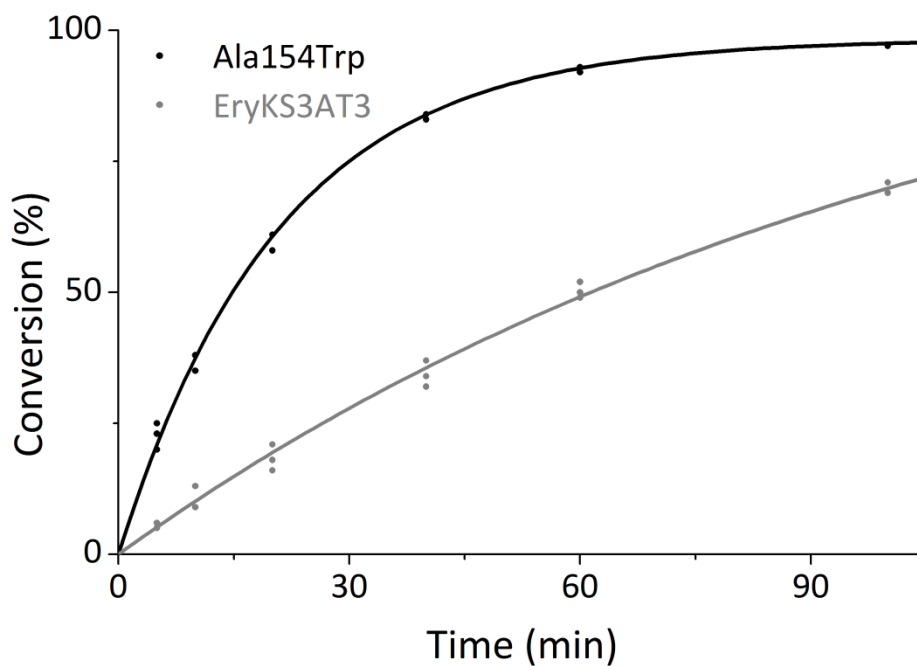

**Figure S7. Malonylation of EryACP3 with MlsAT9.**

Deconvoluted traces of mass spectrometric analysis of the incubation of malonyl coenzyme with EryACP3 in (a) the absence of an acyltransferase; in the presence of (b) MlsAT9; (c) MlsAT9 and EryKS3AT3; and (d) EryKS3AT3.

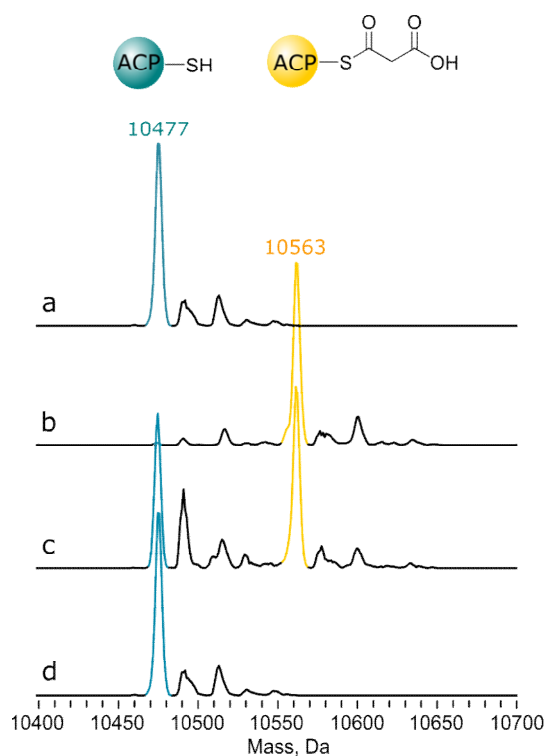



**Table S4. Condensation assays using malonyl-CoA**

Percentage of EryACP3 bearing Claisen condensation product after incubation with EryKS3AT3 or its mutants, malonyl CoA and synthetic SNAc substrate.

| Substrate | EryKS3AT3 | A <sub>154</sub> G | A <sub>154</sub> W | K <sub>155</sub> A | F <sub>156</sub> Q | V <sub>173</sub> M | A <sub>230</sub> T | F <sub>263</sub> T | F <sub>265</sub> W |
|-----------|-----------|--------------------|--------------------|--------------------|--------------------|--------------------|--------------------|--------------------|--------------------|
| 3         | 3         | T                  | 6                  | 5                  | 3                  | 3                  | 2                  | T                  |                    |
| 4         | 5         | 2                  | 11                 | 8                  | 5                  |                    | 2                  | T                  |                    |
| 5         | T         |                    | 6                  | 2                  | 2                  | T                  | T                  |                    |                    |
| 6         |           |                    | T                  |                    |                    |                    |                    |                    |                    |
| 7         |           |                    | 4                  | 2                  | T                  | T                  | T                  |                    |                    |
| 8         | 3         |                    | 9                  | 3                  | T                  | 5                  | T                  |                    |                    |
| 9         |           |                    | T                  |                    |                    |                    |                    |                    |                    |
| 10        | 11        | 2                  | 16                 | 9                  | 3                  | 6                  | 4                  |                    |                    |
| 11        |           |                    | 3                  |                    |                    |                    |                    |                    |                    |
| 12        |           |                    | T                  |                    |                    |                    |                    |                    |                    |
| 13        |           |                    | 5                  |                    |                    |                    |                    |                    |                    |
| 14        |           |                    | 5                  | T                  | 3                  |                    |                    |                    |                    |
| 15        | T         |                    | T                  | 4                  | T                  | T                  | T                  |                    |                    |
| 16        |           |                    | T                  |                    |                    |                    |                    |                    |                    |
| 17        |           |                    | T                  | T                  | T                  |                    |                    |                    |                    |
| 18        |           |                    |                    |                    |                    |                    |                    |                    |                    |
| 19        |           |                    |                    |                    |                    |                    |                    |                    |                    |

### Figure S8. Dimer interface loop location

The location of the EryKS3AT3 dimer interface loop (blue sticks) including the A154 residue mutated during this study (orange) for one KS subunit is shown alongside the catalytic triad (red sticks). The surface of this subunit is shown in blue for the KS and red for the AT and post-AT linker, while the surface of the second subunit is shown in yellow.

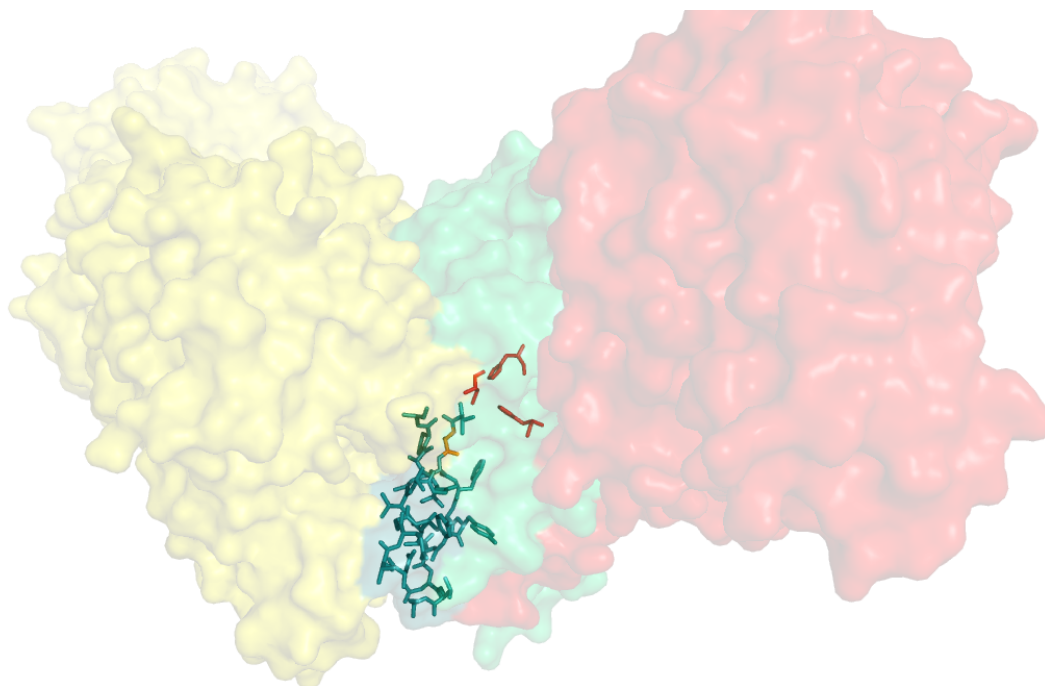

### Figure S9. Sequence alignment of PKS type I *cis*-AT ketosynthases

199 sequences were chosen to represent the various type I KS clades identified by Jenke-Kodama et al., and were aligned using Clustal Omega (EMBL-EBI).<sup>[23]</sup> All non-loading domain ketosynthases from the following clusters were used: mycolactone, erythromycin, amphotericin, avermectin, borrelidin, epothilone, lasalocid, rapamycin, nyastatin, spinosyn, tylactone, niddamycin, monensin, oligomycin, rifamycin, pikromycin and stambomycin.

```
mycol_001_KS_001.seq      EPVAVVGMACRFPGGVASADQLWDLVIAGRDRVGNFPADRGWDVEGLFDFPD-PDAVGKTY
mycol_001_KS_002.seq      EPVAVVGMACRFPGGVASADQLWDLVIAGRDRVGNFPADRGWDVEGLFDFPD-PDAVGKTY
mycol_001_KS_003.seq      EPVAVVGMACRFPGGVASADQLWDLVIAGRDRVGNFPADRGWDVEGLFDFPD-PDAVGKTY
mycol_001_KS_004.seq      EPVAVVGMACRFPGGVASADQLWDLVIAGRDRVGNFPADRGWDVEGLFDFPD-PDAVGKTY
mycol_001_KS_005.seq      EPVAVVGMACRFPGGVASADQLWDLVIAGRDRVGNFPADRGWDVEGLFDFPD-PDAVGKTY
mycol_001_KS_006.seq      EPVAVVGMACRFPGGVASADQLWDLVIAGRDRVGNFPADRGWDVEGLFDFPD-PDAVGKTY
mycol_001_KS_007.seq      EPVAVVGMACRFPGGVASADQLWDLVIAGRDRVGNFPADRGWDVAGLFDFPD-PDAVGKTY
mycol_001_KS_008.seq      EPVAVVGMACRFPGGVASADQLWDLVIAGRDRVGNFPADRGWDVEGLFDFPD-PDAVGKTY
mycol_002_KS_001.seq      ERVAVVGMACRFPGGVASADQLWDLVIAGRDRVGNFPADRGWDVEGLFDFPD-PDAVGKTY
mycol_003_KS_001.seq      EPVAVVGMACRFPGGVASADQLWDLVIAGRDRVGNFPADRGWDVEGLFDFPD-PDAVGKTY
mycol_003_KS_002.seq      EPVAVVGMACRFPGGVASADQLWDLVIAGRDRVGNFPADRGWDVEGLFDFPD-PDAVGKTY
mycol_003_KS_003.seq      EPVAVVGMACRFPGGVASADQLWDLVIAGRDRVGNFPADRGWDVEGLFDFPD-PDAVGKTY
mycol_003_KS_004.seq      EPVAVVGMACRFPGGVASADQLWDLVIAGRDRVGNFPADRGWDVEGLFDFPD-PDAVGKTY
mycol_003_KS_005.seq      EPVAVVGMACRFPGGVASADQLWDLVIAGRDRVGNFPADRGWDVEGLFDFPD-PDAVGKTY
mycol_003_KS_006.seq      EPVAVVGMACRFPGGVASADQLWDLVIAGRDRVGNFPADRGWDVEGLFDFPD-PDAVGKTY
mycol_003_KS_007.seq      EPVAVVGMACRFPGGVASADQLWDLVIAGRDRVGNFPADRGWDVEGLFDFPD-PDAVGKTY
eryth_001_KS_001.seq      EPVAVVAMACRLPGGVSTPEEFWELLSSEGRDAVAGLPTDRGWDLDSLHFPD-PTRSGETAH
eryth_001_KS_002.seq      EPIAIVGMACRLPGEVDSPELWELITSEGRDAAEVPDDRGRWVPELMSD-AA----GT
eryth_002_KS_001.seq      DPIAIVGMACRFPGGVSTPEELWELLSSEGRDAAEVPDDRGRWVPELMSD-AA----GT
eryth_002_KS_002.seq      EPIAIVGIGCRFPGGIGSPQLWRLVLAEGANLTTGFPADRGWDIGRLYHPD-PDNPGETSY
eryth_003_KS_001.seq      EPIAIVGMACRFPGGVSTPEEFWELLSSEGRDAAEVPDDRGRWVPELMSD-AA----GT
eryth_003_KS_002.seq      DPIAIVGMACRFPGGVSTPEELWELLSSEGRDAAEVPDDRGRWVPELMSD-AA----GT
ampho_002_KS_001.seq      EPVAIVGMACRFPGGVSTPEELWELLSSEGRDAAEVPDDRGRWVPELMSD-AA----GT
ampho_002_KS_002.seq      --IVIVGMACRFPGGVSTPEELWELLSSEGRDAAEVPDDRGRWVPELMSD-AA----GT
ampho_003_KS_001.seq      EPIAVVIGICRFPGGVSTPEELWELLSSEGRDAAEVPDDRGRWVPELMSD-AA----GT
ampho_003_KS_002.seq      DPIVIVGMACRFPGGVSTPEELWELLSSEGRDAAEVPDDRGRWVPELMSD-AA----GT
ampho_003_KS_003.seq      DPIVIVGMACRFPGGVSTPEELWELLSSEGRDAAEVPDDRGRWVPELMSD-AA----GT
ampho_003_KS_004.seq      DPIVIVGMACRFPGGVSTPEELWELLSSEGRDAAEVPDDRGRWVPELMSD-AA----GT
ampho_003_KS_005.seq      DPIVIVGMACRFPGGVSTPEELWELLSSEGRDAAEVPDDRGRWVPELMSD-AA----GT
ampho_003_KS_006.seq      DPIVIVGMACRFPGGVSTPEELWELLSSEGRDAAEVPDDRGRWVPELMSD-AA----GT
ampho_004_KS_001.seq      EPIAIVGMACRFPGGVSTPEELWELLSSEGRDAAEVPDDRGRWVPELMSD-AA----GT
ampho_004_KS_002.seq      DPIVIVGMACRFPGGVSTPEELWELLSSEGRDAAEVPDDRGRWVPELMSD-AA----GT
ampho_004_KS_003.seq      EPIAIVGMACRFPGGVSTPEELWELLSSEGRDAAEVPDDRGRWVPELMSD-AA----GT
ampho_004_KS_004.seq      DPIAIVGMACRFPGGVSTPEELWELLSSEGRDAAEVPDDRGRWVPELMSD-AA----GT
ampho_004_KS_005.seq      DPIAIVGMACRFPGGVSTPEELWELLSSEGRDAAEVPDDRGRWVPELMSD-AA----GT
ampho_004_KS_006.seq      DPIVIVGMACRFPGGVSTPEELWELLSSEGRDAAEVPDDRGRWVPELMSD-AA----GT
ampho_005_KS_001.seq      EPIAVVGMACRFPGGVSTPEELWELLSSEGRDAAEVPDDRGRWVPELMSD-AA----GT
ampho_005_KS_002.seq      DPVVIVGMACRFPGGVSTPEELWELLSSEGRDAAEVPDDRGRWVPELMSD-AA----GT
ampho_005_KS_003.seq      DPVVIVGMACRFPGGVSTPEELWELLSSEGRDAAEVPDDRGRWVPELMSD-AA----GT
ampho_006_KS_001.seq      EPVAIVGMACRFPGGVSTPEELWELLSSEGRDAAEVPDDRGRWVPELMSD-AA----GT
averm_001_KS_001.seq      DPIAIVGMACRFPGGVSTPEELWELLSSEGRDAAEVPDDRGRWVPELMSD-AA----GT
averm_001_KS_002.seq      EPIAIVGMACRFPGGVSTPEELWELLSSEGRDAAEVPDDRGRWVPELMSD-AA----GT
averm_002_KS_002.seq      EPIAIVGMACRFPGGVSTPEELWELLSSEGRDAAEVPDDRGRWVPELMSD-AA----GT
averm_002_KS_003.seq      EPIAIVGMACRFPGGVSTPEELWELLSSEGRDAAEVPDDRGRWVPELMSD-AA----GT
averm_002_KS_004.seq      EPIAIVGMACRFPGGVSTPEELWELLSSEGRDAAEVPDDRGRWVPELMSD-AA----GT
averm_003_KS_001.seq      EPIAIVGMACRFPGGVSTPEELWELLSSEGRDAAEVPDDRGRWVPELMSD-AA----GT
averm_003_KS_002.seq      EPVAIVGMACRFPGGVSTPEELWELLSSEGRDAAEVPDDRGRWVPELMSD-AA----GT
averm_003_KS_003.seq      EPIAIVGMACRFPGGVSTPEELWELLSSEGRDAAEVPDDRGRWVPELMSD-AA----GT
averm_004_KS_001.seq      EPIAIVGMACRFPGGVSTPEELWELLSSEGRDAAEVPDDRGRWVPELMSD-AA----GT
averm_004_KS_002.seq      EPIAIVGMACRFPGGVSTPEELWELLSSEGRDAAEVPDDRGRWVPELMSD-AA----GT
averm_004_KS_003.seq      EPIAIVGMACRFPGGVSTPEELWELLSSEGRDAAEVPDDRGRWVPELMSD-AA----GT
borre_002_KS_001.seq      EPIAIVGMACRFPGGVSTPEELWELLSSEGRDAAEVPDDRGRWVPELMSD-AA----GT
borre_003_KS_001.seq      EPIAIVGMACRFPGGVSTPEELWELLSSEGRDAAEVPDDRGRWVPELMSD-AA----GT
borre_003_KS_002.seq      DAIVIVGMACRFPGGVSTPEELWELLSSEGRDAAEVPDDRGRWVPELMSD-AA----GT
borre_004_KS_001.seq      DPIAIVGMACRFPGGVSTPEELWELLSSEGRDAAEVPDDRGRWVPELMSD-AA----GT
borre_005_KS_001.seq      EPIAIVGMACRFPGGVSTPEELWELLSSEGRDAAEVPDDRGRWVPELMSD-AA----GT
borre_006_KS_001.seq      EPVAIVGMACRFPGGVSTPEELWELLSSEGRDAAEVPDDRGRWVPELMSD-AA----GT
epoth_002_KS_001.seq      --IAVIGMGRFPGGVSTPEELWELLSSEGRDAAEVPDDRGRWVPELMSD-AA----GT
epoth_003_KS_001.seq      EPIAIVGIGCRFPGGADAFELWELLSSEGRDAAEVPDDRGRWVPELMSD-AA----GT
```

epoth\_003\_KS\_002.seq DPPIAIVGAACRFPGGVEDLESYWQLLTEGVVVSTVEVPADR-WNGADGRGPGSGEAPRQTY  
epoth\_003\_KS\_003.seq EPIAIVGAACRFPGGVEDLESYWQLLAEQVVAEVPADR-WDAADWYDFD-PEIPGRQTY  
epoth\_003\_KS\_004.seq EPIAVIGICRFPGGVTDPESEFWRLLEEGSDAVVEVPHER-WDIDAFYDFD-PDVRGKMT  
epoth\_004\_KS\_001.seq EPIAIVGICRFPGGAGTPEAFWELLDGRDAIRP-LEER-WALV-GVDFG-DDVPR---  
epoth\_004\_KS\_002.seq DDIAIVGAACRFPGGDEGLETYWRHLAEQMVVSTVEVPADR-WRAADWYDFD-PEVPGRTY  
epoth\_005\_KS\_001.seq EPIAIIIGICRFPGGADTPEAFWELLDGRDAVQP-LDRR-WALV-GVHPS-EEVPR---  
lasal\_001\_KS\_002.seq DPVAIVMACRFPGGVSPEDDLWRLVAEGGDAISGFPTDRGWDMDALYDFD-PTRTGKNY  
lasal\_001\_KS\_003.seq EPIAIVGMACRYPGDVRSPEDLWQMVAEGRDVIAGFPADRGWDLLEGLYDFD-SARPGTSY  
lasal\_002\_KS\_001.seq EPIAIVGMACRFPGGADTPELWELVAEGRDAITGFPTDRGWDLDALDFD-PDRSGTSY  
lasal\_002\_KS\_002.seq EPVAIVGMACRFPGGVRSPEDLWRLVVDGDAVSDFPADRGWDLDALDFD-PDHPGTSY  
lasal\_002\_KS\_003.seq EPLAIVSMACRFPGGVSPEDLWQYVQGRDAVSDFPVDRGWDLERLYDFD-PERSGTSY  
lasal\_003\_KS\_001.seq EPIAIVGMCRYPGDVRSADDLWGLLAEGGDAISKFPDRGWNTTEELYDFD-PDRPGRNY  
lasal\_004\_KS\_001.seq EPIAIIIGMACRPPGGVDSPEGLWELVDSGTDAIAGFPDRGWVDEGMYDFD-AEAPGKTY  
lasal\_005\_KS\_001.seq EPVAIVGMCRYPGDVRSPEELWDLVAEGRDAVSSFPADRGWDLDALRDA-PDRPGTSY  
lasal\_005\_KS\_002.seq EPLAIVSMACRFPGGVSPEDLWRLVADLGVVSGFPDRGWDLRLYDFD-PGQAGTSY  
lasal\_006\_KS\_001.seq EPIAIVGMACRFPGGADSPDTFWELVAEGRDAISGMPDRGWDLDALYDFD-PSHAGTSY  
lasal\_007\_KS\_001.seq EPVAIVGMACRFPGGVSPEDLWRLVTEGRDAVADFPDRGWDLDSLYDFD-PDHPGTSY  
rapam\_001\_KS\_001.seq EPLAIVGMACRPPGGVSPEDLWRLVDSGTDAISGFPTDRGWVDVGLDFD-PDASGKSY  
rapam\_001\_KS\_002.seq EPLAIVGMACRPPGGVSPEDLWRLLESSTDAVSGFPDRGWVDEGLYDFD-VGNSY  
rapam\_001\_KS\_003.seq EPLAIVGMACRPPGGVSPEDLWRLLESSTDAVSGFPDRGWVDEGLYDFD-AGKSH  
rapam\_001\_KS\_004.seq EPLAIVGMACRPPGGVSPEDLWRLVDSGTDAVSGFPDRGWVDEGLYDFD-PEAGKSY  
rapam\_002\_KS\_001.seq EPLAIVGMACRPPGGVSPEDLWRLVDSGTDAISGFADRGWVDEGLYDFD-PEAGKSY  
rapam\_002\_KS\_002.seq EPLAIVGMACRPPGGVSPEDLWRLVDSGTDAISGFADRGWDAESLDFD-PDAAGKSY  
rapam\_002\_KS\_003.seq EPLAIVGMACRPPGGVSPEDLWRLVDSGTDAVSGFPDRGWVDEGLYDFD-PDAAGKSY  
rapam\_002\_KS\_004.seq EPLAIVGMACRPPGGVSPEDLWRLLESSTDAVSGFPDRGWVDEGLYDFD-AGDSY  
rapam\_002\_KS\_005.seq EPLAIVGMACRPPGGVSPEDLWRLVDSGTDAISGFPTDRGWVDEGLYDFD-PDAAGKSY  
rapam\_002\_KS\_006.seq EPLAIVGMACRPPGGVSPEDLWRLVDSGTDAISGFPTDRGWVDEGLYDFD-PDAAGKSY  
rapam\_003\_KS\_001.seq EPLAIVGMACRPPGGVSPEDLWRLVDSGTDAISDFPADRGWVDEGLYDFD-PDASGKSY  
rapam\_003\_KS\_002.seq EPLAIVGMACRPPGGVSPEDLWRLLESSTDAVSGFPDRGWVDEGLYDFD-AGKSH  
rapam\_003\_KS\_003.seq EPLAVVMACRPPGGVSPEDLWRLVDSGTDAISGFADRGWDAESLDFD-PDASGKSY  
rapam\_003\_KS\_004.seq EPIAIVMACRPPGGVSPEDLWRLVDSGTDAISGFPTDRGWVDEGLYDFD-PDAAGKSY  
nysta\_002\_KS\_001.seq EPIAIVGMACRFPGGVSPEDLWRLVDSGTDAISGFVDRGWDLLETLGNG-DG--SSAT  
nysta\_002\_KS\_002.seq DPPIAVIGMSCRYPGGATPEELRLALDGDVISEFPADRGWDAEGLYDFD-PDRPGHTY  
nysta\_003\_KS\_001.seq EPVAVVIGICRFPGGVTSPEDLWELVAEGRDVIQFPDRGWDLLEKLAGGG-E---GGSL  
nysta\_003\_KS\_002.seq DPPIVIVGMACRYPGGIASPEDLWRLVDSGTDAITGFPTNRGWDLNLYDFD-PDRPGRTH  
nysta\_003\_KS\_003.seq DPVIVVGMACRFPGGVTSPEDLWRLVDSGTDAITTFPTNRGWDLNLYDFD-PDRPGHTY  
nysta\_003\_KS\_004.seq DPVIVIGMSCRFPGGIGSPEDLWRLVDSGTDAITTFPTNRGWDLNLYDFD-PAHAGTSY  
nysta\_003\_KS\_005.seq DPVIVVGMACRYPGGVASPEDLWRLVDSGTDAITTFPTNRGWVDEGLYDFD-PDHLGTSY  
nysta\_003\_KS\_006.seq DPVIVVGMACRFPGGVTSPEDLWRLVDSGTDAITTFPTNRGWDLLESLYDFD-PAHLGTSY  
nysta\_004\_KS\_001.seq EPVAIIGMTCRFPGGVTSPEELWRLVDSGTDAISGFPTDRGWDLLEALAAA-----P  
nysta\_004\_KS\_002.seq DPVIVVGMACRYPGGVSPEDLWRLVTEGTDAVSGFPDRGWVDEGLYDFD-PDHPGTSY  
nysta\_004\_KS\_003.seq EPIAIIIGMACRFPGGVSPEDLWDLVDSGTDAISEFPVNRGWQTHLDFD-PDRPGHTY  
nysta\_004\_KS\_004.seq DPPIAIVGMSCRYPGGVSAEDLWRLVDSGTDAISGFADRGWDAEGLYDFD-PDRPGRTY  
nysta\_004\_KS\_005.seq DPPIAVIGICRFPGGVTSPEELWQLLDEGRDGISRFPDRGWDLLEALGAGA-----SD  
nysta\_004\_KS\_006.seq DAIVVGMACRYPGGVTSPEDLWQLVGDVAVGDFPTDRGWDLAALAGDG-PG--RSAT  
nysta\_005\_KS\_001.seq EPIAVVMACRFPGAVDSPEALWEMVATGTDVISEGFPTDRGWDLLEALRNSG-TDARDTDV  
nysta\_005\_KS\_002.seq DPVIVVGMSCRFPGGVSPEDLWDLVDSGTDAITGFADRWRHPQLAGA--P--GART  
nysta\_005\_KS\_003.seq DPVIVVGMACRFPGGVTSPEELWQLLAEGRDGIADFPDRGWDLNLYDFD-PDRP  
nysta\_006\_KS\_001.seq EPVAIVGMACRFPGGVRSPEDLWELLSAGRDGIGFPADRGWDLAALAGDG-PG--RSAT  
spino\_002\_KS\_001.seq DPPIAIVMASCRYPGQVSPEDLWQLAAGGVDAISEVPDRGWDLNLYDFD-SDRPGTSY  
spino\_003\_KS\_001.seq EPIAIVMGCRYPGGVQDPEGLWKLVAAGGDAIGFPADRGWHLDELYDFD-PDQPGTCY  
spino\_003\_KS\_002.seq EPIAIVMASCRYPGGVSPEDLWRLVDSGTDAISEFPDRGWDAEGLYDFD-ASRPGTTY  
spino\_004\_KS\_001.seq EPIAIVSASCRLPGGVDSPEALWQLVRTGTDAISEFPADRGWDLGRLYDFD-PNHQGTSY  
spino\_004\_KS\_002.seq --VAIVGMCRYPGGVSPEDLWRLVAGGVDAVAGFPDRGWDLAALYDFD-PDRLGTSY  
spino\_004\_KS\_003.seq DPVIVVGMACRYPGGVDSPEELWQLVDSGTDAISFPVDRGWDCNTLDFD-PDRAGSTY  
spino\_005\_KS\_001.seq DPPIAIVSMCRYPGGVSPEDLWRLVDSGTDAIANFPDRGWDLNLYDFD-PDRAGTSY  
spino\_005\_KS\_002.seq DPVIVVGMCRYPGGVSPEDLWRLVAGGLDAVAEFPDRGWDAQGLDFD-PDRLGTSY  
spino\_005\_KS\_003.seq DLVAIVGMCRYPGQVSPEDLWRLVAGGVDAVADFPADRGWDLAALYDFD-PERAGKTY  
tylac\_001\_KS\_002.seq EPIAVVMGCRFPGGVSPEDLWRLVDSGTDAISFPDRGWVDEGLYDFE-PGVAGKSY  
tylac\_001\_KS\_003.seq DPVIVVGMACRFPGGVTSPEELWKLVAEGRDVIAGAAPDRGWDLNLYDFE-PGVAGKTY  
tylac\_002\_KS\_001.seq EPIAVVMASCRYPGGVTSPEDLWRLVDSGTDAISGLPRDRGWDLNLYDFD-G-GPGTSY  
tylac\_003\_KS\_001.seq EPIAVVMGCRFPGGVSPEDLWRLVDSGTDAISFPDRGWVDEGLYDFE-PGVAGKSY  
tylac\_003\_KS\_002.seq EPIAIVSMACRMPGGVTSPEELWRLVDSGTDAISFPANRGWDLNLYDFD-PDAGRTY  
tylac\_004\_KS\_001.seq EPIAVVMACRYPGGVTSPEELWELVAGGRDAIGFPVDRGWVDSVYDFD-PESKGTTY  
tylac\_005\_KS\_001.seq EPIAVVMACRYPGGVTSPEELWELVAGGRDAIGFPVDRGWVDSVYDFD-PESKGTTY  
nidda\_001\_KS\_002.seq DPPIAVIGICRFPGGVATPDDLWELVDSGTDAISTFPTDRGWDLNLYDFD-PSTPGKSY  
nidda\_001\_KS\_003.seq EPVAVVGMACRYPGGVATPDDLWELVDSGTDAISTFPTDRGWDLNLYDFD-PSTPGKSY  
nidda\_002\_KS\_001.seq EPVAVVGMACRYPGGVATPDDLWELVDSGTDAISTFPTDRGWDLNLYDFD-PSTPGKSY  
nidda\_003\_KS\_001.seq EPVAVVGMACRYPGGVATPDDLWELVDSGTDAISTFPTDRGWDLNLYDFD-PSTPGKSY  
nidda\_003\_KS\_002.seq EPIAIIIGMACRPPGGVRSPEDLWELLSGADAITAFPTDRGWNDALYDFD-PAASRRTY  
nidda\_004\_KS\_001.seq EPIAIVGMACRPPGGVRSPEDLWELLSGADAITAFPTDRGWNDALYDFD-PDRPGTTY  
nidda\_005\_KS\_001.seq EPIAIVGMACRYPGGVTSPEELWQLAAGGVDAITFRPTDRGWDAEAVSYDFE-H-RPGTTY  
monen\_001\_KS\_002.seq DPVAIVMASCRYPGGAGTPEDLWRLVDSGTDAIGDFPTDRGWDLARLHFPD-PDRSGTSC  
monen\_002\_KS\_001.seq EPVALVGMACRFPGGVSPEDLWDLVAAGKDAIEDFPDRGWDLLEALYDFD-PAAYGTSY  
monen\_003\_KS\_001.seq EPVAVVEAACRYPGGIRTPEDLWDLVAAGGNALGAFPDRGWDLRRLHFPD-PDHPGTTY  
monen\_003\_KS\_002.seq DPPIAIVGMACRYPGGVTSPEELWQLVATGTDAIGFPEDRGWDLNLYDFD-PDQVGHYSY  
monen\_004\_KS\_001.seq EPIAIVSMACRFPGGDTRTPEALWDLVAEGGDAIDDFPTNRGWDLNLYDFD-PDHPGTSY

monen\_004\_KS\_002.seq DPVAIVAMTCRFPGGVASPEDDLWDLDDARKDAMGAFPTDRGWDLERLHFHPD-PDHPGTSY  
monen\_005\_KS\_001.seq EPVAVVMACRFPGGIETPEGLWELVAAGDDAIEFPPTDRGWDLLEGIYHPD-PDHPGTCY  
monen\_005\_KS\_002.seq EPVAIVAMACKYPPGGATSEPEGLWDLVAEGVDVAVGAFPTGRGWDLERLHFHPD-PDHPGTSY  
monen\_006\_KS\_001.seq EPIAIVAMACRYPPGGVASPEQLWDLVSRGDAIEEFPADRGGWDVAGLYHPD-PDHPGTTY  
monen\_007\_KS\_001.seq EPVAVIGMACRLPGGVRSPPEEFWELVSTGGDAVAPLPGNRNWDLDSLYDPD-PESTGTSY  
monen\_008\_KS\_001.seq EPVAIVMACRYPPGGARSADLWELVDRGGDAVAGFPDDRGGWDLLESYHPD-PHPATS  
monen\_008\_KS\_002.seq EPIAIVMACRYPPGGVSAEELWDLVAAGKDAMGAFPPDRGGWDLLEYDPD-PESRGT  
oligo\_001\_KS\_002.seq DPIVIVMGCRPLPGGVRSPEDLWRFVAAGGDAISALPVDRGWEFAA-----DF  
oligo\_001\_KS\_003.seq DPVVIVSAACRFPGGVTTPEELWQLVLDGGDAIGFPPADRGGWDLDRLYDPD-PGNPGTSY  
oligo\_001\_KS\_004.seq DPVVIVAMACRFPGEATSPEKLDWDLIAAGKDGIGDFPADRGWSVAADAAFS-----  
oligo\_002\_KS\_001.seq EPIAVSMGCRFPGGVIASPEDLWECVRTGTDTTISGFPTDRGWRTGHLRG-----DF  
oligo\_002\_KS\_002.seq DPIAIVMACRYPPGGVRSPEDLWDLVHCGRDGVGDFPTDRGWDLPALRRLA-PD-----L  
oligo\_003\_KS\_001.seq EPIAIVMACRYPPGGVSSPEDLWRLVTDDETAIGFPTDRGGWDLGLHHPD-PDHPGTCY  
oligo\_003\_KS\_002.seq EPLVIVMACRYPPGGITSPQLWDLVIGERDAVSGFPPDRGGWSTGAPADG-----SV  
oligo\_004\_KS\_001.seq EPIAIVMACRYPPGGVSPDQLWDLVRRGEDAVTGMPDRGWELGELYDPD-PDHPGTSY  
oligo\_004\_KS\_002.seq EPIAIVMACRYPPGGVASPEELWELVAAGRDAIGDMPEDRGWNVVEELYDPE-LARPGTSY  
oligo\_005\_KS\_001.seq EPIAIVMACRFPGGAQTPEDLWHMVSEGVDAISGFPPDRGGWDLDRLYRTD-AEESGAST  
oligo\_006\_KS\_001.seq EPLAIVGIGCRYPPGGVVRTEDLWRLITEGRDAMSGFPTDRGWDRWDIPT-----  
oligo\_006\_KS\_002.seq EPLAIVMACRYPPGGVRDADLWRLIVEGRDELSDFPTDRGWDRWGAPA-----  
oligo\_006\_KS\_003.seq EPLAIVMACRYPPGGVSPEDLWQVVVENKDGMSDFPSYRGWDRWNLAS-----  
oligo\_007\_KS\_001.seq EPLAVVMACRLPGGVDSPQLWQVMVDGADGVSGFPPDRGGWDLSSLFSDS-PDRPGTTY  
oligo\_007\_KS\_002.seq DPIVIVMACRFPGGVRSPEDLWRLVDRDEMTDFPADRGWGLAMNAFI-EE---SGG  
oligo\_007\_KS\_003.seq EPIAIVMACRPLPGGVASPEDLWRLVAERVDVAVSEFPDRGGWDLDSLIDPD-RERAGTSY  
rifam\_001\_KS\_001.seq EPIAIVMACRYPPGGVSPEDLWRLVADGADAVTEFPADRGGWDLRHYED-PDHEGTTY  
rifam\_001\_KS\_002.seq EPIAIVMSTRPLPGGADSPPELWKLVAEGRDAVSGFPPDRGGWDLGLYHPD-PAHAGTSY  
rifam\_001\_KS\_003.seq EPIAIVMSTRPLPGGADSPPELWKLVAEGRDAVSGFPPDRGGWDLGLYHPD-PAHAGTSY  
rifam\_002\_KS\_001.seq EPVAVSMACRYAGGIRSPEDLWVSEGVADVYTGFPDRGGWDEGLYHPD-PDNPPTTY  
rifam\_002\_KS\_002.seq EPIAIVMACRPLPGGVMSPEDLWRMVAEGRDGMSPFPDRGGWDLGLFSDS-PERPGTAY  
rifam\_002\_KS\_003.seq EPIAIVMACRPLPGGVSPEDLWRLVAEGRDAVSSFPPTDRGGWDTSLYDPD-PARPGTTY  
rifam\_003\_KS\_001.seq EPIAIVMACRPLPGGVTPGDLWRLVAEGGDAVSGFPTDRCWDLDTLDFDP-PDHAGTSY  
rifam\_004\_KS\_001.seq EPIAIVMACRYPPGGVSSPEDLWRLVAEGTDAVSAFPPDRGGWVDGLVDPD-PDRPGTTY  
rifam\_005\_KS\_001.seq EPLAVVMACRFPGGVSSPEDLWQLVAGGVDALSDFPPDRGGWDLGLFSDS-PDHPGTSY  
rifam\_005\_KS\_002.seq EPIAIVMACRPLPGGVSPEDLWRLVDRGLEGLSFPFPDRGGWDLNFDSD-PDRSGTTY  
pikro\_001\_KS\_002.seq EPVAVVMACRPLPGGVASPEDLWRLVAGGDAISEFPQDRGGWDEGLYHPD-PHPGTSY  
pikro\_001\_KS\_003.seq DPIAIVAMSCRYPGDIRSPEDLWRMLSEGGEGITFPPTDRGGWDLGLYDAD-PDALGRAY  
pikro\_002\_KS\_001.seq EPVAVVMACRPLPGGVASPEDLWRLVAGGEDAISEFPQDRGGWDEGLYDPN-PEATKSY  
pikro\_002\_KS\_002.seq EPVAVVMACRPLPGGVASPEDLWRLVAGGEDAISEFPQDRGGWDEGLYDPD-PDASGRTY  
pikro\_003\_KS\_001.seq EPVAVVMACRPLPGGVASPEDLWQLVAGGDAISEFPQDRGGWDEGLYDPD-PDASGRTY  
pikro\_004\_KS\_001.seq EPMAIVMSCRFPAGGIRSPEDLWDAVAGKDLVSEVPEERGWIDSLYDPV-PGRKGTTY  
Stamb\_001\_KS\_002.seq DPVVIVSMACRFPGGIDSPAALWEALSEGREVLTGLPEDRGWQPALAALE-----TPL  
Stamb\_001\_KS\_003.seq EPIAVVAMCRPLPGGVSPEELWRLVREGRDGTGFPPTDRGGWDLARLHDPD-PSRPGTTY  
Stamb\_001\_KS\_004.seq DPVAVVMGCRFPGA-ATPEEFWDLRSRGLDLVGDFFPADRGWDLRDAPD-----F  
Stamb\_002\_KS\_001.seq EPIAIVSMACRFPGGVTRPEQLWHLVTEGRDAVGFPPADRGGWDLDALDPD-PERPGGSY  
Stamb\_002\_KS\_002.seq EPIAIVMSCRPLPGGVRSPADLWRLVHAEDAITAFTPTDRGWDIDTDDL-----PY  
Stamb\_003\_KS\_001.seq EPIAIVMSCRPLPGGVASPEELWRLVADGTDAIVDFPDRGGWDTQTAET-----GY  
Stamb\_003\_KS\_002.seq EPIAIVMSCRYPGGANSPEQLWDLVSRGDDVTFPTDRGGWPEG-GDG-----DY  
Stamb\_003\_KS\_003.seq EPIAIVMACRPLPGGVASPADLWPLVSEGMDATSGFPADRGGWPLDIVG-----AE  
Stamb\_003\_KS\_004.seq EPIAIVMSARYPPGGVRNAEQLWELVAHAGDGTAEFPADREWPSDVVAG-----A  
Stamb\_003\_KS\_005.seq EPLALVGMACRPLPGGVSPEELWDLVLIIGVDAMTTFPTDRGGWDLTALPDS-----  
Stamb\_004\_KS\_001.seq EPIAIVMSCRYPGDVHTPEDLWRLVAGEQDAISGFPPDRGGWDLARLFDGD-PDGEHSS  
Stamb\_004\_KS\_002.seq DPIAIVMACRFPGGADTPEALWRLVAEETDAVGDFFPTDRAWLAHIYGES-EKADD-RR  
Stamb\_004\_KS\_003.seq EPLAVIGMSCRYPGGVDSPEDLWRLVLDGTDAMGFPSPDRGGWVENLYHPD-PDHPGTSY  
Stamb\_005\_KS\_001.seq EPIAIVMACRYPPGGVSPEDLWKLVESGTDALGFLPTDRGGWDPARTSA-----  
Stamb\_006\_KS\_001.seq EPIAIVMACRPLPGGVDSASLWDLVSAAGDGISEFPADRGGWDLGSLYDPH-SRGEGETSY  
Stamb\_006\_KS\_002.seq EPVAIVMACRYPPGVTSPELWQLVAEGRDGVTFDFPDRGGWDTARLYEED-G-TPGTSY  
Stamb\_007\_KS\_001.seq EPVAVVMGCRYPGGVHSPEDLWHLVSEGRDGI SGFPPLDRGGWDT-AVYDDD-PDAAGTTY  
Stamb\_007\_KS\_002.seq EPLAIVMACRYPPGGVSPEDLWKLVESGTDALGFLPTDRGGWDTDDDTG-----PGTSY  
Stamb\_008\_KS\_001.seq EPMAVVSACTLPGGVRSPEDLWRLVSGTDAVTFPPDRGGWDDGLVGAEGV--AAPE  
Stamb\_008\_KS\_002.seq EPIAIVMSCRYPGEVNSPEDLWRLVATGSDAIGFPPDRGGWDTALYDPD-PDAAGKSY  
Stamb\_009\_KS\_001.seq EPIAIVMSCRFPGGADSPPEALWRLVDRGIDAMGFPADRGGWDMTHFETGV-A--ADVEF  
Stamb\_009\_KS\_002.seq DPIVIVMACRFPGGVRSPELWKLVESGTDAMGFPADRGGWDLDAL-----GGDY  
Stamb\_009\_KS\_003.seq EPVAIVMSCRFPGGVDSPEALWRLVDRGVDAMGFPADRGGWDLDTLLGHG----GPSH  
Stamb\_009\_KS\_004.seq DPVVIVSMSCRYPGGADSPENLWEVVAAGTDAMSGFPVDRGGWDLPA-----GDF

... \* .

mycol\_001\_KS\_001.seq TRYGAFLDDAAGFDAGFFGISPREARAMDPQQRLLLEVCWEALETAGI PAHTLAGTS-TG  
mycol\_001\_KS\_002.seq TRYGAFLDDAAGFDAGFFGISPREARAMDPQQRLLLEVCWEALETAGI PAHTLAGTS-TG  
mycol\_001\_KS\_003.seq TRYGAFLDDAAGFDAGFFGISPREARAMDPQQRLLLEVCWEALETAGI PAHTLAGTS-TG  
mycol\_001\_KS\_004.seq TRYGAFLDDAAGFDAGFFGISPREARAMDPQQRLLLEVCWEALETAGI PAHTLAGTS-TG  
mycol\_001\_KS\_005.seq TRYGAFLDDAAGFDAGFFGISPREARAMDPQQRLLLEVCWEALETAGI PAHTLAGTS-TG  
mycol\_001\_KS\_006.seq TRYGAFLDDAAGFDAGFFGISPREARAMDPQQRLLLEVCWEALETAGI PAHTLAGTS-TG  
mycol\_001\_KS\_007.seq TRYGAFLDDAAGFDAGFFGISPREARAMDPQQRLLLEVCWEALETAGI PAHTLAGTS-TG  
mycol\_001\_KS\_008.seq TRYGAFLDDAAGFDAGFFGISPREARAMDPQQRLLLEVCWEALETAGI PAHTLAGTS-TG  
mycol\_002\_KS\_001.seq TRYGAFLDDAAGFDAGFFGISPREARAMDPQQRLLLEVCWEALETAGI PAHTLAGTS-TG  
mycol\_003\_KS\_001.seq TRYGAFLDDAAGFDAGFFGISPREARAMDPQQRLLLEVCWEALETAGI PAHTLAGTS-TG  
mycol\_003\_KS\_002.seq TRYGAFLDDAAGFDAGFFGISPREARAMDPQQRLLLEVCWEALETAGI PAHTLAGTS-TG  
mycol\_003\_KS\_003.seq TRYGAFLDDAAGFDAGFFGISPREARAMDPQQRLLLEVCWEALETAGI PAHTLAGTS-TG  
mycol\_003\_KS\_004.seq TRYGAFLDDAAGFDAGFFGISPREARAMDPQQRLLLEVCWEALETAGI PAHTLAGTS-TG

mycol\_003\_KS\_005.seq TRYGAFLDDAAGFDAGFFGISPREARAMDPQQRLLLEVCWEALETAGI PAHTLAGTS-TG  
mycol\_003\_KS\_006.seq TRYGAFLDDAAGFDAGFFGISPREARAMDPQQRLLLEVCWEALETAGI PAHTLAGTS-TG  
mycol\_003\_KS\_007.seq TRYGAFLDDAAGFDAGFFGISPREARAMDPQQRLLLEVCWEALETAGI PAHTLAGTS-TG  
eryth\_001\_KS\_001.seq QRGGGFLTEATAFDPAFFGMSPREALAVDPQQRLLMELLSWEVLERAGI PPTSLQASP-TG  
eryth\_001\_KS\_002.seq RAHGNFMAGAGFDAAFFGISPREALAMPQQRQALETTWEALESAGI PPETLRGSD-TG  
eryth\_002\_KS\_001.seq VDKGGFLDDAAGFDAAFFGVSPREAAAMPQQRLLLETSWELVENAGIDPHSLRGTA-TG  
eryth\_002\_KS\_002.seq VDKGGFLDDAAGFDAAFFGITPREALAMPQQRLLMLETWEAVERAGIDPDLRGTD-TG  
eryth\_003\_KS\_001.seq ARLGGMLAAAGFDAGFFGISPREALAMPQQRIMLETWEALERAGHDPVSLRGSA-TG  
eryth\_003\_KS\_002.seq SRHGAFLDGAADFDAFFGISPREALAMPQQRQVLETTWELFENAGIDPHSLRGSD-TG  
ampho\_002\_KS\_001.seq H-EGGFLEYEATDFDAGFFGISPREATAMPQQRLLLEVSWEALERAGIAPTSLRSSA-TG  
ampho\_002\_KS\_002.seq SVHGGFLHEAAGFDAAFFGVSPREALAMPQQRLLLETWEVLERAGIDPESLHSTA-TG  
ampho\_003\_KS\_001.seq AQVGGFLDDAAGFDAAFFGVSPREAVAMPQQRILLETWEALERAGIDPSALRGSR-TG  
ampho\_003\_KS\_002.seq VRAGGFLHDAGSFDADFFGMSPREALSTDSQQRLLLETSWEAVERAGIDPHSLRGSR-TG  
ampho\_003\_KS\_003.seq TRSGGFLHDAGDFDPPFFGMSPREALATDSQQRLLLETSWEA IERAGIDPLSLRDSR-TG  
ampho\_003\_KS\_004.seq TRSGGFLHNAADFADFFGMSPREAMATDSQQRLLLETSWEA IERAGIDPVTLRGSA-TG  
ampho\_003\_KS\_005.seq TRSGGFLHEAGEFDPAFFGMSPREALSTDSQQRLLLETSWEA IERAGIDPVGLRGSA-TG  
ampho\_003\_KS\_006.seq TRSGGFLHEAGEFDPAFFGMSPREALATDSQQRLLLETSWEA IERAGIDPVGLRGSA-TG  
ampho\_004\_KS\_001.seq TRSGGFLHDAPEFDADFFGISPREAVAMPQQRVVLESWEA IERAGINPTSVRGSR-TG  
ampho\_004\_KS\_002.seq TRSGGFLHEAGEFDPAFFGMSPREALATDSQQRLLLEASWEA IERAGIDPVGLRGSA-TG  
ampho\_004\_KS\_003.seq STQGGFLHEAAGFDAAFFGVSPREALVMDPQQRLLLETWEA IERAGIDPDLRGSL-TG  
ampho\_004\_KS\_004.seq SVQGGFLRDVADFDPFFGISPREALSMDPQQRLLLETWEVFNAGLDPVAQRGSR-TG  
ampho\_004\_KS\_005.seq TLHGGFLAQVADFDPFFGISPREALAMPQQRLLLETWEA IERAGIDPAALRGST-TG  
ampho\_004\_KS\_006.seq D-QGGFLYDATDFDPPGLFGVSPREAVMDPQQRILLEASWEA IERAGIDPGLRGSGTTG  
ampho\_005\_KS\_001.seq SQRGGFLDSIADFDPFFGISPREAVTMDPQQRLLLETWEA IERAGIDPDLRGSR-TG  
ampho\_005\_KS\_002.seq A-QGGFLSDIAGFDADFFGISPREALAMPQQRILLEVTWEA IERAGVDPTALRGSR-TG  
ampho\_005\_KS\_003.seq G-QGGFLSDIADFADFFGIAPREALAMPQQRILLEVTWEA IERAGLDPALRGSR-TG  
ampho\_006\_KS\_001.seq Q-EGGFLLHDVADFDPFFGISPREALAMPQQRLLLETWEA IERAGIAPGSLRGSR-TG  
averm\_001\_KS\_001.seq PQGGGFLHDAAGFDAAFFGVSPREALAMPQQRLLLETSWEA IERAGIDPLSVRGSR-TG  
averm\_001\_KS\_002.seq TRNGGFLYDAGHFDAAFFGISPREALAMPQQRLLLETAWETIEHAGINPHTLHGTP-TG  
averm\_002\_KS\_001.seq TRSGGFLYDAGDFDAFFELSPREALAMPQQRLLLETWETFEQGGIDPRSMRGSR-TG  
averm\_002\_KS\_002.seq TRSGGFLYDAGNFDPPFFGISPREALAMPQQRLLLETAWESIEHACINPDSLHGTP-TG  
averm\_002\_KS\_003.seq TRNGGFLYDAGHFDAAFFGVSPREALAMPQQRLLLETAWETIEHAGINPHTLHGTP-TG  
averm\_002\_KS\_004.seq TRNGGFLYGAGHFDAAFFGISPREALAMPQQRLLLETAWETIEHAGINPHTLHGTP-TG  
averm\_003\_KS\_001.seq ARYGGFLYEAGEFDADFFGISPREALAMPQQRLLLETSWEA IERAGIDPLSMRGSR-TG  
averm\_003\_KS\_002.seq TRCGSFLYDAGEFDAGFFGISPREALAMPQQRLLLEASWEAMEQAGIDPTTVRGSQ-TG  
averm\_003\_KS\_003.seq ARYGGFLYEAGEFDAAFFGVSPREALAMPQQRLLLETSWEA IERAGIDPLSMRGSR-TG  
averm\_004\_KS\_001.seq TRRGGFLGAAEFDAFFGISPREALAMPQQRLLMELLSWEA IERAGIDPATLRGSR-TG  
averm\_004\_KS\_002.seq TRRGGFLGAAEFDAFFGISPREALAMPQQRLLMELLSWEA IERAGIDPATLRGST-TG  
averm\_004\_KS\_003.seq TRCGGFLQAAEFDAFFGISPREALAMPQQRLLMELLSWEA IERAGIDPATLHGST-TG  
borre\_002\_KS\_001.seq VREGGFLDAGQFDAAFFGVSPREALAMPQQRLLLECSWEA IERSRIDPKTLHGSR-TG  
borre\_003\_KS\_001.seq VREGGFLDAGRFDAFFGISPREAVVMDPQQRLLLECSWEA IERSRIDPKTLHGSR-AG  
borre\_003\_KS\_002.seq VRHGGFLHDVAGFDAGFFGISPREALAMPQQRLLLECSWEA IERAGIDPATLRGSR-SG  
borre\_004\_KS\_001.seq VREGGFLVDVAGFDAGFFGISPREALAMPQQRLLLECSWEA IERAGIDPSSLEGTR-TG  
borre\_005\_KS\_001.seq AREGGFLYDAGEFDAAFFGVSPREALSMDPQQRLLLECSWEA IERAGIDPSSLRGSD-VG  
borre\_006\_KS\_001.seq RREGGFLYDAGRFDAFFGISPREALAMPQQRLLLETSWEA IERAGIDPSSLRGSD-TG  
epoth\_002\_KS\_001.seq VRAGSVLEDVDRFDAAFFGISPREAELMDPQHRI FMECAWEALENAGYDPTAYRGS--IG  
epoth\_003\_KS\_001.seq -WAGLLTEPIDCFDAFFGISPREARSLDPQHRLLLEVAWEGLEDAGIPPRSIDGSR-TG  
epoth\_003\_KS\_002.seq VPRGGFLREVETFDAAFFGVSPREAMSLDPQQRLLLEVSWEA IERAGIDPSSLRGSA-TG  
epoth\_003\_KS\_003.seq VTKGAFLRDLQRLDATFFRISPREAMSLDPQQRLLLEVSWEA IERAGIDPSSLRGSA-TG  
epoth\_003\_KS\_004.seq TRFGGFLSDIDREFPAFFGISPREATTMDPQQRLLLETSWEA IERAGIDPSSLRGSA-TG  
epoth\_004\_KS\_001.seq -WAGLLTEAIDGFDAAFFGIAPREARSLDPQHRLLLEVAWEGLEDAGIPPRSLVGRS-TG  
epoth\_004\_KS\_002.seq VAKGAFLRDVRSLSDAFFGISPREAMSLDPQQRLLLEVSWEA IERAGIDPSSLRGSA-TG  
epoth\_005\_KS\_001.seq -WAGLLTEAVDGFDAFFGTSPREARSLDPQQRLLLEVTWEGLEDAGIAPQSLDGSR-TG  
lasal\_001\_KS\_002.seq VREGGFLDSAADFDAFFGVSPREALAMPQQRLLLETSWEA IERAGVAPGSLRGTR-TG  
lasal\_001\_KS\_003.seq AREGGFLHDAGHFDPAFFGISPREALAMPQQRLLLETSWEVFERAGLDPALKGSR-TG  
lasal\_002\_KS\_001.seq TRSGGFLDAAEFDAFFGVSPREALAMPQQRLLMELLSWEVLERAGIADPARQRTA-TG  
lasal\_002\_KS\_002.seq ARQGGFLDDAADFAGFFGISPREALSMDPQQRLLLETSWEVFERAGIDPATLKGSR-TG  
lasal\_002\_KS\_003.seq TRSGSFLYDAADFDAQFLFGISPREALAMPQQRLLLETSWEVLERAGINPRSLRGSD-TG  
lasal\_003\_KS\_001.seq VREGGFLHDATEFDADFFGISPREALAMPQQRIMLEVAWETFEHAGLDPQSFSGSD-TG  
lasal\_004\_KS\_001.seq VKEAGFLYDAGEFDAGFFGISPREAVSMDPQQRLLMELLSWEA IERAGLDPARQRTA-TG  
lasal\_005\_KS\_001.seq TGSGGFMDVAGFDAAFFGVSPREALAMPQQRLLLETSWEVLERAGLDPATLKGSR-TG  
lasal\_005\_KS\_002.seq TSQGGFLYDAGQFDPLFFGISPREALAMPQQRLLLETSWEVLERAGIDPAALRGTD-TG  
lasal\_006\_KS\_001.seq AREGGFLPDAGHFDAAFFGVSPREALAMPQQRLLVLEASWEA IERAGINPQSLRGSR-TG  
lasal\_007\_KS\_001.seq TSQGGFLYDAGQFDPLFFGISPREALAMPQQRLLLETSWEVFERAGIDPSSLGTR-TG  
rapam\_001\_KS\_001.seq CVQGGFLDTAAGFDASFFGISPREALAMPQQRLLVLEVSWEA IERAGIEPGSVRGSD-TG  
rapam\_001\_KS\_002.seq RLQGGFLDAAAGFDASFFGISPREALAMPQQRLLVLEVSWEA IERAGIEPGSVRGSD-TG  
rapam\_001\_KS\_003.seq RAEGGFLDAAAGFDAGFFGISPREALAMPQQRLLVLEVSWEA IERAGIEPGSVRGSD-TG  
rapam\_001\_KS\_004.seq CVQGGFLDTAAGFDASFFGVSPREALAMPQQRLLLEVSWEA IERAGIEPGSVRGSD-TG  
rapam\_002\_KS\_001.seq CVQGGFLDSAGGFDAFFGISPREALAMPQQRLLVLEASWEA IERAGIEPGSLRGSD-TG  
rapam\_002\_KS\_002.seq CVEGGFLDSAASFDAGFFGISPREALAMPQQRLLIMEVSWEA IERAGIEPGSVRGSD-TG  
rapam\_002\_KS\_003.seq RAEGGFLDTAAGFDAGFFGISPREALAMPQQRLLLEVSWEA IERAGIEPGSVRGSD-TG  
rapam\_002\_KS\_004.seq RLQGGFLDAAAGFDASFFGVSPREALAMPQQRLLVLEVSWEA IERAGIEPGSVRGSD-TG  
rapam\_002\_KS\_005.seq CVEGGFLATAANFDASFFGVSPREALAMPQQRLLVLEVSWEA IERAGIEPGSVRGSD-TG  
rapam\_002\_KS\_006.seq SVQGGFLDAAAGFDASFFGVSPREALAMPQQRLLMELLSWEA IERAGIEPGSVRGSD-TG  
rapam\_003\_KS\_001.seq CVQGGFLDSAGGFDAFFGVSPREALAMPQQRLLVLEVSWEA IERAGIEPGSLRGSD-TG  
rapam\_003\_KS\_002.seq RAEGGFLDAAAGFDAGFFGISPREALAMPQQRLLVLEVSWEA IERAGIEPGSVRGSD-TG  
rapam\_003\_KS\_003.seq CVEGGFLDSAGSFDAGFFGISPREALAMPQQRLLIMEVSWEA IERAGIEPGSVRGTH-RR

rapam\_003\_KS\_004.seq CVQGGFLDTAADFDAPFFGISPREALGMDPQQRLLLETTWEAIERAQIDPKSLRGRD-VG  
nysta\_002\_KS\_001.seq H-EGGFLYDAAEFDAAFFGISPREATAMDPQQRLLLEVAWEALERAGIAPTALRGRS-AG  
nysta\_002\_KS\_002.seq SVQGGFLHEAAGFDPGFFGISPREAVAMDPQQRLLLETSWEAFERAGIDPFLTRDSR-TG  
nysta\_003\_KS\_001.seq AQVGGFVEDAAGFDPGFFGISPREAVAMDPQQRILLETWEALERAGIDPSTLRGTP-TG  
nysta\_003\_KS\_002.seq VRAGGFLHDAGSFDADFFGMSPREAMATDSQQRLLLELSWEAVERAGIDPASLRDSG-TG  
nysta\_003\_KS\_003.seq TRSGGFLHEAGEFDPAFFGMSPREALATDSQQRLLLESSWEAIERAGIDPFLTRLGRSA-TG  
nysta\_003\_KS\_004.seq ARTGGFLHDAADFADFFGMSPREAMATDSQQRLLLESSWEAIERAGIDPFLTRLGRS-TG  
nysta\_003\_KS\_005.seq TRSGGFLHEAGEFDPAFFGMSPREALATDSQQRLLLESSWEAIERAGIDPVSLRGRS-TG  
nysta\_003\_KS\_006.seq TRSGGFLHEAGEFDPAFFGMSPREALATDSQQRLLLESSWEAIERAGIDPFLTRLGRSA-TG  
nysta\_004\_KS\_001.seq TASGGFLHDAPFDADFFGISPREAVAMDPQQRVVLESWEAIFERAGIDPSTVKGRS-TG  
nysta\_004\_KS\_002.seq TRSGGFLHEAGEFDPAFFGMSPREALATDSQQRLLLESSWEAIERAGIDPVSLRGRS-TG  
nysta\_004\_KS\_003.seq STQGGFLHEADEFDPTFFGISPREALVMDPQQRLLLETTWESFERAGIRPETLRLSTL-TG  
nysta\_004\_KS\_004.seq SVQGGFLRDVAEFDPGFFGISPREALSMDPQQRLLLETTWEAFERAGIDPVGQRGRS-TG  
nysta\_004\_KS\_005.seq TLEGGFLTGVAFDADFFGISPREALAMDPQQRLLLETTWEALERAGIDPTTLRGST-TG  
nysta\_004\_KS\_006.seq A-QGGFLYDATDFDPLGFFGISPREALVMDPQQRILLETWEALERAGIDPATLRSRGTG  
nysta\_005\_KS\_001.seq SQRGGFLDCIADFDPGFFGISPREAVTMDPQQRLLLETTWEAVERAGIDATTLRATR-TG  
nysta\_005\_KS\_002.seq G-QGGFLRDIADFDAAFFGISPREALAMDPQQRILLETWEAVERAGIDPQTLRGS-TG  
nysta\_005\_KS\_003.seq PRSAASSYDAAAFDPAFFGISPREALAMDPQQRLLLETTWEAIVERTGTPTRLRGRS-TG  
nysta\_006\_KS\_001.seq Q-EGGFLPDAAAFDPAFFGISPREALAMDPQQRLLLETTWEAVERSGIDPAGLRGRS-TG  
spino\_002\_KS\_001.seq ACAGGFLQGVSEFDPAFFGISPREALAMDPQQRLLLEVAWEVERAGIDPFLSRGRS-VG  
spino\_003\_KS\_001.seq TRHGGFLHDAGEFDAGFFDISPREALAMDPQQRLLLEISWETVESAGMDPRSLRGRS-TG  
spino\_003\_KS\_002.seq ARMAGFLYDAGEFDADLFGISPREALAMDPQQRLVLEIWEAVERAGIDPFLSLRGS-VG  
spino\_004\_KS\_001.seq TRAGGFLLAGAGFDPAFFGISPREALAMDPQQRLLLELSWEALERAGIDPFLSRGRS-TG  
spino\_004\_KS\_002.seq VCEGGFLRDAAEFDPAFFGISPREALAMDPQQRLLLEVAWEVERAGIDPFLSRGRS-TG  
spino\_004\_KS\_003.seq VREGAFLTGADRFDAGFFGISPREARAMDPAFFGISPREALAMDPQQRLLLEVAWEVERAGIAPFLSRGRS-TG  
spino\_005\_KS\_001.seq VREGGFLRGVADFADLFGISPREAQAMDPAFFGISPREALAMDPQQRLLLEISWEVERAGIDPFLSRGTK-TG  
spino\_005\_KS\_002.seq VCEGGFLRDAAEFDAGFFGISPREALAMDPQQRLLLEVAWEVERAGIDPFLSRGRS-TG  
spino\_005\_KS\_003.seq VREGAFLTDADRFDAGFFGISPREALAMDPQQRLLLELSWEAVERAGIDPFLSRGRS-TG  
tylac\_001\_KS\_002.seq VREGGFLHDAAEFDPAFFGISPREAVAMDPQQRLLLETSWEAIERAGIDPHSLHGRS-TG  
tylac\_001\_KS\_003.seq VREGGFLHDAAEFDPAFFGISPREAVAMDPQQRLLLETSWEAIERAGIDPHSLHGRS-TG  
tylac\_002\_KS\_001.seq AREGGFLSHCAGFDPAFFGISPREALAMDPQQRLLLETSWEALERAGVTADRARGSR-TG  
tylac\_003\_KS\_001.seq VREGGFLHDAAEFDPAFFGISPREAVAMDPQQRLLLETSWEAIERAGIDPHSLRGRS-TG  
tylac\_003\_KS\_002.seq VREGGFLHEAPDFDPAFFGISPREALAMDPQQRLLLETSWEALERAGIDPARLRGRS-TG  
tylac\_004\_KS\_001.seq CREGGFLHDAGFDADFFGISPREAVAMDPQQRLLLETSWEAIEAAGIDPRGLRGRS-TG  
tylac\_005\_KS\_001.seq CREGGFLEGAGFDPAFFGISPREALVMDPQQRLLLEVSWEALERAGIDPSSLRGRS-GG  
nidda\_001\_KS\_002.seq VRHGGFLHDAAQFDPAFFGISPREATAMDPQQRLLLETSWEALERAGIDPFLTRGRS-TG  
nidda\_001\_KS\_003.seq VRHGGFLHDAAQFDPAFFGISPREATAMDPQQRLLLETSWEALEHAGIAPHTLRLTR-TG  
nidda\_002\_KS\_001.seq VRHGGFLHDAAQFDPAFFGISPREATAMDPQQRLLLETSWEALEHAGIAPHTLRLTR-TG  
nidda\_003\_KS\_001.seq VRHGGFLHDAAQFDPAFFGISPREATAMDPQQRLLLETSWEALEHAGIAPHTLRLTR-TG  
nidda\_003\_KS\_002.seq ARAGGFLHDAAEFDPAFFGISPREALAMDPQQRLSLETAWESFERAGIDPFLSRGRS-TG  
nidda\_004\_KS\_001.seq CREGGFVRGVDRFDPAFFGISPREALAMDPQQRLLLETVWESLERAGIDPKSLRGRS-TG  
nidda\_005\_KS\_001.seq CREGGFLAGAGFDPAFFGISPREALVMDPQQRLLLETSWEALERAGIDPFLSRGRS-TG  
monen\_001\_KS\_002.seq TRQGGFLYDAAFDPAFFDISPREALVMDPQQRLLLECAWEAIFERAGIDPFLSRGRS-TG  
monen\_002\_KS\_001.seq VRHGGFVDAGSFDPAFFGISPREALAMDPQQRLMLETWEAIFERAGIDPFLSRGRS-TG  
monen\_003\_KS\_001.seq AREGGFLHDADLDFDPAFFGISPREAAVLDPAFFGISPREALAMDPQRSLOQGRS-TG  
monen\_003\_KS\_002.seq TREGGFLYDAAAFDPAFFGISPREAAATDPQQRLLLETTAWQAFERAGIDPAAALRGT-PCG  
monen\_004\_KS\_001.seq VRRGGFLYDAPAFDPAFFGISPREALAMDPQQRVLMETAWQLLERAGIDPASLKLTA-TG  
monen\_004\_KS\_002.seq TDQGGFLPDAGFDPAFFGINPREALAMDPQQRLLLEASWEVERAGIDPFLTRGRS-TG  
monen\_005\_KS\_001.seq VREGGFLAAPDRFDSDFGFFGISPREALASSPQLRLLLETSWEALERAGINPASLKGSP-TG  
monen\_005\_KS\_002.seq ADEGAFLPDAGFDPAFFGINPREALAMDPQQRLLLEASWEVERAGIDPFLTRGRS-TG  
monen\_006\_KS\_001.seq VREAGFLRDAARFDPAFFGINPREALAMDPQQRVLLEVSWEAIFERAGIDPATLKDTL-TG  
monen\_007\_KS\_001.seq VREGGFLYDAGFDPAFFGISPREAIAATDPQQRLLLETSWEALERAGIDPFLSRGRS-TS  
monen\_008\_KS\_001.seq VRDGAFLYDAGHFDPAFFGISPREATAMDPQQRLLLETTWEAIEHAGMNPALKGSD-TG  
monen\_008\_KS\_002.seq VREGGFLYDAGFDPAFFGISPREAVAMDPQQRLLLETTWEAIEHAGMNPALKGSD-AG  
oligo\_001\_KS\_002.seq PGEggFLADVAEFDPAFFGISPREALAMDPQQRLLLETSWEALERAGVDALKLRGRS-TG  
oligo\_001\_KS\_003.seq VREGGFLTDVADFADPAFFGISPREALAMDPQQRLLLETSWEALERAGVDALKLRGRS-TG  
oligo\_001\_KS\_004.seq -QTGGFLPDVAEFDPAFFGISPREALAMDPQQRLLLETSWEALERAGVDALKLRGRS-TG  
oligo\_002\_KS\_001.seq RLAGGFLADAAGFDAGLFGISPREALAMDPQQRLLLETSWEAVERAGIDPFLTRGRS-TG  
oligo\_002\_KS\_002.seq AMKGGFLPDAAFDPAFFGISPREATAMDPQQRLLLETSWEAVERAGIDPFLTRGRS-TG  
oligo\_003\_KS\_001.seq AEAGGFVEDIASFDPAFFGISPREAQSMDDPQQRLLLETSWEALEHAGLDIHALRGRS-TG  
oligo\_003\_KS\_002.seq PQQGGFLDRVAEFDPAFFGISPREALAMDPQQRLLLETSWEALERAGIAPGTLRGRS-TG  
oligo\_004\_KS\_001.seq ATEGGFLRGATEFDPAFFGVSPREALAMDPQQRLLLETTWEAIENTGLDPRSLRGRS-TG  
oligo\_004\_KS\_002.seq VREGGFLYDAAEFDPAFFGISPREALAMDPQQRLLLETSWEALERAGIDPRAVRGRS-TG  
oligo\_005\_KS\_001.seq TLEGGFLHAGFDADFFGISPREAIAATDPQQRLLLETSWEALERAGIDPFLSRGRS-TG  
oligo\_006\_KS\_001.seq ARTGAFLHDAGFDPAFFRISPREAMAMDPQQRLLLETSWEALERAGIDPATLKGSR-TG  
oligo\_006\_KS\_002.seq VQAGFLHEAGEFDPAFFGISPREAASMDPQQRLLLETSWEAVEQAGIDPWSLRGRS-TG  
oligo\_006\_KS\_003.seq LRRAGFLHEAGFDPAFFGISPREAMAMDPQQRLLLETSWEAIVERTGIDPHSLRGRS-TG  
oligo\_007\_KS\_001.seq TREGAFLRGAGFDPAFFGISPREALAMDPQQRLLLETSWEALERAGIDPFLTRGRS-TG  
oligo\_007\_KS\_002.seq ARQGAFLAEAGFDPAFFGISPREALAMDPQQRLLLETSWEALERAGIDPFLTRGRS-TG  
rifam\_001\_KS\_001.seq VQGGGFLHDAGEFDAGFFGISPREAVAMDPQQRLLLETSWEALENAGVDPIALKGTD-TG  
rifam\_001\_KS\_002.seq VRHGAFLDDAAGFDPAFFGISPREALAMDPQQRLLLETSWEAIFERAGIDPFLTRGRS-TG  
rifam\_001\_KS\_003.seq TRSGGFLHDAAQFDAGLFGISPREALAMDPQQRLLLETSWEALERAGIDPFLTRGRS-TG  
rifam\_002\_KS\_001.seq VREGAFLQDAAQFDAGFFGISPREALAMDPQQRLLLETSWEAVERAGIDPHSVRGRS-TG  
rifam\_002\_KS\_002.seq IRQGGFLHEAALFDPAFFGISPREALAMDPQQRLLLETSWEAVERAGIDPFLTRGRS-TG  
rifam\_002\_KS\_003.seq TRHGGFLHEAGLFDAGFFGISPREAVAMDPQQRLLLETSWEAVERAGIDPFLTRGRS-TG  
rifam\_003\_KS\_001.seq TDQGGFLHDAALFDPAFFGISPREALAMDPQQRLLLETSWEAVERAGIDPFLTRGRS-TG  
rifam\_004\_KS\_001.seq TDQGGFLHEAGLFDAGFFGISPREAVAMDPQQRLLLETSWEAIVERTGIDPFLTRGRS-TG

rifam\_005\_KS\_001.seq TSQGGFLRGAGLFDAGLFGISPREALVMDPQQRVLLETSSWEALEDAGVDPKSLKGS-D-VG  
 rifam\_005\_KS\_002.seq TSRRGGFLDGAGLFDAGFFGISPREALAMDPQQRLLEAWEALETGVDGPKSLKGD-VG  
 pikro\_001\_KS\_002.seq VRQGGFIENVDAGFDAAFFGISPREALAMDPQQRLLETSWEALEDAGIDPTSLKGRQ-VG  
 pikro\_001\_KS\_003.seq VREGGFLHDAAEFDAAFFGVSPREALAMDPQQRMLLTSWEAFERAGIEPASLRGSS-TG  
 pikro\_002\_KS\_001.seq AREAGFLYEAGEFDADFFGISPREALAMDPQQRLLEASWEAFEHAGIPAAATARGTS-VG  
 pikro\_002\_KS\_002.seq CRAGGFLDEAGEFDADFFGISPREALAMDPQQRLLETSWEALEDAGIDPTSLQGGQ-VG  
 pikro\_003\_KS\_001.seq CRSGGFLHDAGEFDADFFGISPREALAMDPQQRLSLTAWEAIESAGIDPTSLKGRG-LG  
 pikro\_004\_KS\_001.seq VRNAAFLDDAAGFDAAFFGISPREALAMDPQQRLLEASWEVFERAGIDPASVRGTD-VG  
 Stamb\_001\_KS\_002.seq PTAGGFLDDIAGFDAAFFGISPREAVAMDPQQRLLEVTWEALERLGTDPDTRGRS-TG  
 Stamb\_001\_KS\_003.seq ARHGGFLHDAADFDAELFGISPREALAMDPQQRLLELSWEAFERAGIDPTGLRGS-D-TG  
 Stamb\_001\_KS\_004.seq ARRGGFLPDAAGFDADLFGVSPREAVAMDPQQRLMLEISWETFERAGVDPASLQGSR-VG  
 Stamb\_002\_KS\_001.seq GHEGGFLHEAAEFDAAGLFEISPREAVAMDPQQRLLETSWEVFERAGIDPKSVRGAR-VG  
 Stamb\_002\_KS\_002.seq APLGGFLDDVAGFDAGLFGISPREALAMDPQQRLLETSWEAFAAGLDFLAVAGEP-IG  
 Stamb\_003\_KS\_001.seq TRRGGFVDPAAEFDAALFGINPREALAMDPQQRLLEAWEAERAGIDPHSLAGS-D-TG  
 Stamb\_003\_KS\_002.seq ARRGGFVDGATEFDAAFFGISPREALAMDPQQRLLEASWEAFEHAGIDPLSNHTR-TG  
 Stamb\_003\_KS\_003.seq AARGGFLDEATDFDAALFGISPREALAMDPQQRLLETSWEAFESAGIATSDAHGSS-TG  
 Stamb\_003\_KS\_004.seq AARGGFDGATEFDAGLFGISPREALAMDPQQRLLEASWEAFESAGLNFRSLRGRP-VG  
 Stamb\_003\_KS\_005.seq TLRGGFVDGVAEFDAAGLFGISPREALAMDPQQRLLETSWETFERAGVDPRAVRGRS-VG  
 Stamb\_004\_KS\_001.seq ARQGGFVHDATAFDADFFGVSPREALAMDPQQRLLLRAAWEVFEHAGIDPQSVRGRTR-TG  
 Stamb\_004\_KS\_002.seq TFEGGFLQDAGGFDPAFFGISPREALAMDPQQRLLETSWEAFERAGVDPALRASS-TG  
 Stamb\_004\_KS\_003.seq VKEGGFLADASHFDASLFGISPREAVATDPQQRLLEATWEAMERATIDPSSLRGS-P-TG  
 Stamb\_005\_KS\_001.seq APRGGFVHDVGDADLFGISPREAAATDPQQRLLEASWEAERAGIDMRTLGRGR-TG  
 Stamb\_006\_KS\_001.seq SRQGGFVHDAGRFDADFFSISPREAAAMDPQQRLLEASWEAERAGIDPKEVKGSP-VG  
 Stamb\_006\_KS\_002.seq VREGGFLGDVAEFDPAFFGISPREAVATDPQQRLMLQVAWEALEHAGVDPALRGS-D-TA  
 Stamb\_007\_KS\_001.seq VREGGFLHDAGEFDAGLFGISPREALAMDPQQRLMLETSWEALERAGIDPLSLRGRS-TG  
 Stamb\_007\_KS\_002.seq TRVGGFVHDATSFADLFGISPREAMAMDPQQRLLETSWELFERAGLSPHAVRSTP-TG  
 Stamb\_008\_KS\_001.seq ASQGGFLHDAGMFDPAFFGINPREALAMDPQQRLVLESVWEAMERAGIDPDLRGRS-TG  
 Stamb\_008\_KS\_002.seq VLQGGFVHDADRFDPAFFGISPREALAMDPQQRLMLEASWEAERAGIDPDLRGRSS-TG  
 Stamb\_009\_KS\_001.seq SREGGFLDGVADFPDLFNI SPHEALAMDPQQRLMLETSWEAERAGIDPLSLRGRS-TG  
 Stamb\_009\_KS\_002.seq PRTGGFLPDATDFDAELFGISPREALAMDPQQRLLEASWEALERAGIHPRSLAGS-R-TA  
 Stamb\_009\_KS\_003.seq TRSGGFLDDIAAFDAGLFGISPREALAMDPQQRLLESAWEAERAGIDPTSVRRSD-TG  
 Stamb\_009\_KS\_004.seq TTEGGFLHDATDFDADLFGISPREAVAMDPHQRLLESAWELLERGGIAPTAVRGR-TG

. : : \* \* \* \* : \* : : . \*

mycol\_001\_KS\_001.seq VFVGAWAQS YGATNS-----DDAEGYAMTGGATSVMSGRIAYTLGLEGPAITVDTAC  
 mycol\_001\_KS\_002.seq VFVGAWAQS YGATNS-----DDAEGYAMTGGATSVMSGRIAYTLGLEGPAITVDTAC  
 mycol\_001\_KS\_003.seq VFVGAGAQS YGATNS-----DDAEGYAMTGGATSVMSGRIAYTLGLEGPAITVDTAC  
 mycol\_001\_KS\_004.seq VFAGAWAQS YGATNS-----DDAEGYAMTGGATSVMSGRIAYTLGLEGPAITVDTAC  
 mycol\_001\_KS\_005.seq VFVGAGAQS YGATNS-----DDAEGYAMTGGATSVMSGRIAYTLGLEGPAITVDTAC  
 mycol\_001\_KS\_006.seq VFAGAWAQS YGATNS-----DDAEGYAMTGGATSVMSGRIAYTLGLEGPAITVDTAC  
 mycol\_001\_KS\_007.seq VFVGAGAQS YGATNS-----DDAEGYAMTGGATSVMSGRIAYTLGLEGPAITVDTAC  
 mycol\_001\_KS\_008.seq VFVGAGAQS YGATNS-----DGAEGYAMTGGATSVMSGRIAYTLGLEGPAITVDTAC  
 mycol\_002\_KS\_001.seq VFVGAWAQS YGATNS-----DGAEGYAMTGGATSVMSGRIAYTLGLEGPAITVDTAC  
 mycol\_003\_KS\_001.seq VFVGAWAQS YGATNS-----DDAEGYAMTGGATSVMSGRIAYTLGLEGPAITVDTAC  
 mycol\_003\_KS\_002.seq VFVGAWAQS YGATNS-----DDAEGYAMTGGATSVMSGRIAYTLGLEGPAITVDTAC  
 mycol\_003\_KS\_003.seq VFVGAWAQS YGATNS-----DDAEGYAMTGGATSVMSGRIAYTLGLEGPAITVDTAC  
 mycol\_003\_KS\_004.seq VFAGAWAQS YGATNS-----DDAEGYAMTGGATSVMSGRIAYTLGLEGPAITVDTAC  
 mycol\_003\_KS\_005.seq VFAGAWAQS YGATNS-----DDAEGYAMTGGATSVMSGRIAYTLGLEGPAITVDTAC  
 mycol\_003\_KS\_006.seq VFAGAWAQS YGATNS-----DDAEGYAMTGGATSVMSGRIAYTLGLEGPAITVDTAC  
 mycol\_003\_KS\_007.seq VFAGAWAQS YGATNS-----DDAEGYAMTGGATSVMSGRIAYTLGLEGPAITVDTAC  
 eryth\_001\_KS\_001.seq VFVGLIPQEYGPRLAEGG-----EGVEGYLMTGTTT SVASGRIAYTLGLEGPAISVDTAC  
 eryth\_001\_KS\_002.seq VFVGMSHQGYATGRPRPE-----DGVGYLLTGNTASVASGRIAYTLGLEGPAITVDTAC  
 eryth\_002\_KS\_001.seq VFLGVAKFGYGED-TAAA-----EDVEGYSVTGAVAPAVASGRISYTMGLEGPSISVDTAC  
 eryth\_002\_KS\_002.seq VFVGMNGQSYMQLLAGEA-----ERVGYQGLGNSASVLSGRIAYTFWEGEPALITVDTAC  
 eryth\_003\_KS\_001.seq VFTGVGTVDYGRPRDEAP-----DEVLYGVGTGTASSVASGRVAYCLGLEGPAMITVDTAC  
 eryth\_003\_KS\_002.seq VFLGAAYQGYGQDAVPE-----D-SEGYLLTGNSAVSVASGRVAYCLGLEGPALITVDTAC  
 ampho\_002\_KS\_001.seq VFVGSYH--WGAPSADTA-----TELHGHALTGTAASVLSGRLSYVYGLEGPAPVITVDTAC  
 ampho\_002\_KS\_002.seq AFFGASYQDYSSSVQNGT-----EGAEVHMMTGTAASVLSGRISYLLGLEGPAPVITVDTAC  
 ampho\_003\_KS\_001.seq VFMGTTGQDYGEVIKASD-----EDADEVYSTTGHAA SVISGRLSYFLGAEGPAPVITVDTGC  
 ampho\_003\_KS\_002.seq VFAGVMYNDYGTIL-----TGEEYEAFRNGSAPSASVSGRVS YTLGLEGPAPVITVDTAC  
 ampho\_003\_KS\_003.seq VFAGVMYH DYGSLL-----GGKEFEGFQGGQSAGSVASGRVSYTFGFEGPAPVITVDTAC  
 ampho\_003\_KS\_004.seq VFAGVMYSGYGTAL-----DGDEFEGFQGGQSALSASVSGRVS YTFGFEGPAPITDITAC  
 ampho\_003\_KS\_005.seq VFAGVMYS DY SAML-----ASPEFEGFQGGSSPSVASGRVSYTFGFEGPAPVITVDTAC  
 ampho\_003\_KS\_006.seq VFAGVMYS DYGSIL-----GGKEFEGLQGGQSAGSVASGRVSYTFGFEGPAPVITVDTAC  
 ampho\_004\_KS\_001.seq VFIGAMAQDYRVGP-----ADGAEGLFQLTGNTG SVLSGRISYTFGTVPAPVITVDTAC  
 ampho\_004\_KS\_002.seq VFAGVMYS DY SAML-----GSPEFEGFQGGSSPSL ASGRVSYTLGLEGPAPVITVDTAC  
 ampho\_004\_KS\_003.seq TFIGSSYQYEGMGAG-----DGAEGHLVGTG TSPSVLSGRLAYVFLGLEGPAPVITVDTAC  
 ampho\_004\_KS\_004.seq TFIGASYQDYGA AVP-GS-----EGSEGHMITGSLPSVLSGRVSYLFLGLEGPALITDITAC  
 ampho\_004\_KS\_005.seq VFVGTNGQDYPNLLRRST-----SDVSGYVATGNTASVMSGRLSYALGLEGPAPVITDITAC  
 ampho\_004\_KS\_006.seq VFVGGGSDYRPPAE-----YQGWQTAQSASLLS GRLAYTFGIQGPVTSVDTAC  
 ampho\_005\_KS\_001.seq TFIGTNGQDYAYLLVRS L-----DDATGVDVGTGTAASAVS GRLSYTFGLEGPAPVITVDTAC  
 ampho\_005\_KS\_002.seq VFMGVNQG DYSSLVMSGR-----DDVAGHATAGLAVSVS GRLSYALGLEGPALITVDTAC  
 ampho\_005\_KS\_003.seq VFMGVSGQDY SGLVMRSR-----DDIASHATTGLAVSVS GRLSYTLGLEGPALISVDTAC  
 ampho\_006\_KS\_001.seq VFVGTNSQDYAHLV LASD-----DDMGYAGNGLAASVMSGRLS FALGFEGPAPVITDITAC  
 averm\_001\_KS\_001.seq VFAGALSFDYGRPRM TASS-EGAADVEGHILTGTG SVLSGRISYFLGLEGPAPVITVDTGC  
 averm\_001\_KS\_002.seq VFTGTNGQDYALRVHN-----AGQSTDGFALTGTAGSVISGRISYTFGFEGPAPVITVDTGC  
 averm\_002\_KS\_001.seq VFVGINPEDYTTGYTHQ-----PSNAVEGYLLTGSAASIASGRISYNFLGLEGPAPITDITAC



averm\_002\_KS\_002.seq VFAGLTYHDIYAARFPT-----APAGFEGYLGHSAGS IASGRVAYALGLEGPALTVDTAC  
 averm\_002\_KS\_003.seq VFTGTNGQDHAHIRQ-----APSGTEGFVLTGAATS IASGRISYILGLEGPAVTLDTAC  
 averm\_002\_KS\_004.seq VFAGINAQDHAHIRQSR-----DVETIEGYALTGSSGVSASGRVAYTLFEGGPAVTVDTAC  
 averm\_003\_KS\_001.seq VFAGVMYHDIYGSRLGT-----IPEGFEGYIGNGSGGAVASGRVAYTLGLEGPAVSVDTAC  
 averm\_003\_KS\_002.seq VFAGLIPQAYGPRRLHEN-----AADTEGYVLTGTSGSVASGRISYTFGFEPPAVSVDTAC  
 averm\_003\_KS\_003.seq VFAGVMYHDIYAARLHH-----VPEGFEGLIANGSAGSVATGRVAYSFGLGEPAVTVDTAC  
 averm\_004\_KS\_001.seq VFAGLMSQDYATRLLS-----VPDDLGYLGNNGNAGS ILSGRVAYTFGFEPPAVTVDTAC  
 averm\_004\_KS\_002.seq VFAGMCSQDYADLVR-----ATEDLEGYAMTGLSSSVTSGRVAYTLGLEGPAVTVDTAC  
 averm\_004\_KS\_003.seq VFAGVSQDYAELLRR-----GTQDHEGYALTGVNSVSVGRLSYTFGFEPPAVTVDTAC  
 borre\_002\_KS\_001.seq VFAGSNWQDYNTLLLN-----AEERSQSYLATGASGVSLSGRVSYTLGMEGPAITVNTAC  
 borre\_003\_KS\_001.seq VFVGSNGQDYGLTLLR-----ADDRSHAYLATGASASVLSGRISYTFGLGKGPVTVDTAC  
 borre\_003\_KS\_002.seq VYAGVMYHEYASRLGA-----TPAGFEGTLGTGSSGSIASGRISYTFDLTGPVAVTVDTAC  
 borre\_004\_KS\_001.seq VYTGLMTHEYATRLPS-----IDEELEGVIGIGNAGSVASGRVSYTLGLNGPAVTVDTAC  
 borre\_005\_KS\_001.seq VYVGAWNSNYGRGG-----GAESSEGHLLTGNASSVSVGRVAYVGLGEPVAVTVDTAC  
 borre\_006\_KS\_001.seq VWFGTIGQDYFSLFAASG-----GEHANYLATAACSASVMSGRVSYTLGKGPVTVDTAC  
 eboth\_002\_KS\_001.seq VFAGANMSYLTSLNHEHPAMMRWPGWFQTLIGNDKDYLATHVSYRLNLRGPSISVQVDTAC  
 eboth\_003\_KS\_001.seq VFVGAFTADYAR-TVARLPRREE---RDAYSATGNMLS IAAGRLSYTLGLQGPCLTVDTAC  
 eboth\_003\_KS\_002.seq VFVGAFTADYAR-TVARLPRREE---RDAYSATGNMLS IAAGRLSYTLGLQGPCLTVDTAC  
 eboth\_003\_KS\_003.seq VFVGAFTADYAR-TVARLPRREE---RDAYSATGNMLS IAAGRLSYTLGLQGPCLTVDTAC  
 eboth\_003\_KS\_004.seq VFVGLFYQDYAALAGGI-----EAFDGYLGTGTASVASGRISYVFLGKGPVTVDTAC  
 eboth\_004\_KS\_001.seq VFVGVCAEYELHAAVAHQFREE---RDAYSATGNMLS IAAGRLSYTLGLQGPCLTVDTAC  
 eboth\_004\_KS\_002.seq VFVGMIGSEH-AERVQGLDDDA---ALLYGTGNLLSVAAGRLSFFLGLHGPTMTVDTAC  
 eboth\_005\_KS\_001.seq VFVGLACSSDYSH-TVAQORREE---QDAYDITGNLTVSVAAGRLSFFLGLHGPTMTVDTAC  
 lasal\_001\_KS\_002.seq VFVGTTFQDYGPR-LHQ-----GTETTEGYLLTGGTPSVASGRISYVFLGKGPVTVDTAC  
 lasal\_001\_KS\_003.seq VFAGLMHHDYAGP-GDR-----LPEGVEGYALTGTQGSVSVGRISYVYVGLGEPVAVTVDTAC  
 lasal\_002\_KS\_001.seq VYVGAGNLGGLVGMQ-----ARPGVEGHSLTGNIGS IISGRISYTFGFEPPAVTVDTAC  
 lasal\_002\_KS\_002.seq VFAGAMYQEYAAAN---V-----APETVEGHFLSGTSSSVSVGRVSYTFGFEPPAVTVDTAC  
 lasal\_002\_KS\_003.seq VFVGAFTADYAR-TVARLPRREE---RDAYSATGNMLS IAAGRLSYTLGLQGPCLTVDTAC  
 lasal\_003\_KS\_001.seq VFVGISNVDTYTWG-HAR-----VPEAVEGYFGTGNFASVLSGRLAYTFGFEPPALTVDTAC  
 lasal\_004\_KS\_001.seq VFVGAFTADYAR-TVARLPRREE---RDAYSATGNMLS IAAGRLSYTLGLQGPCLTVDTAC  
 lasal\_005\_KS\_001.seq VFVGVSPSGYGSQ-AQD-----VPEGAEGYMTGVAVAVASGRISYAFGLGEPVAVTVDTAC  
 lasal\_005\_KS\_002.seq VFAGASASGYGSG-AQE-----ATEGAEGYAMTGAATS VLSGRVAYTFGLGEPVAVTVDTAC  
 lasal\_006\_KS\_001.seq VFVGHVASGYGAHVTDAP-----DGVEGYLGTGTSASVASGRVAYTLGLEGPAVTVDTAC  
 lasal\_007\_KS\_001.seq VFAGAIASGYAIG-LPE-----FPEGVQYVGTGTSASVLSGRISYAFGLGEPVAVTVDTAC  
 rapam\_001\_KS\_001.seq VFMGGFPGGYGAG---A-----DLGFGGATAGAASVLSGRVSYFFGLGEPVAVTVDTAC  
 rapam\_001\_KS\_002.seq VFMGAYPGGYGIG---A-----DLGGFGTTAGAVSVLSGRVSYFFGLGEPVAVTVDTAC  
 rapam\_001\_KS\_003.seq VFMGAYPGGYGAG---A-----DLGGFAATASATSVLSGRVSYFFGLGEPVAVTVDTAC  
 rapam\_001\_KS\_004.seq VFIAGFPVGYGAG---F-----DREGYGATSG-PSVLSGRVSYVFLGEPVAVTVDTAC  
 rapam\_002\_KS\_001.seq VFMGAYPGGYGAG---A-----DLGFGGATAGAASVLSGRVSYFFGLGEPVAVTVDTAC  
 rapam\_002\_KS\_002.seq VFMGAYPGGYGAG---A-----DLGGFAATASATSVLSGRVSYFFGLGEPVAVTVDTAC  
 rapam\_002\_KS\_003.seq VFIAGFPVGYGAG---A-----AREGYGATAA-PNVLSGRLSYFFGLGEPVAVTVDTAC  
 rapam\_002\_KS\_004.seq VFMGAYPGGYGIG---A-----DLGFGGATASAVSVLSGRVSYFFGLGEPVAVTVDTAC  
 rapam\_002\_KS\_005.seq VFMGAFPGGYGIG---A-----DLEGYGATAG-LNVLSGRLSYFFGLGEPVAVTVDTAC  
 rapam\_002\_KS\_006.seq VFIAGFPVGYGAG---A-----DLGGFGTTAGAAVSVLSGRVSYFFGLGEPVAVTVDTAC  
 rapam\_003\_KS\_001.seq VFIAGFPVGYGAG---A-----DLEGYGTTSG-PSVLSGRVSYFFGLGEPVAVTVDTAC  
 rapam\_003\_KS\_002.seq VFMGAYPGGYGIG---A-----DLGFGGATASSVSVLSGRVSYFFGLGEPVAVTVDTAC  
 rapam\_003\_KS\_003.seq -LHGRVRRGGYAG---A-----DLGGFAATASATSVLSGRVSYFFGLGEPVAVTVDTAC  
 rapam\_003\_KS\_004.seq VYVGAAQDYGVGVLDQ-----HDNGITGSSVSVLSGRVSYVFLGKGPVAVTVDTAC  
 nysta\_002\_KS\_001.seq VFVGSYH--WGAPSADAA-----TELHGHALTGTAAVSVLSGRLAYTLGLEGPAVTVDTAC  
 nysta\_002\_KS\_002.seq TFFGASQDYSSVQVQ-----GTGESEAHMVTGTAAVSVLSGRVSYLLGLEGPAVTVDTAC  
 nysta\_003\_KS\_001.seq VFVGTGQDYGEVIKASA-----EDVEVYSTTGHAAVSVLSGRLSYTLGAEGPAVTVDTAC  
 nysta\_003\_KS\_002.seq VFAGVMYNDYGTTL-----TGDEYEAERFNGSAPSASVLSGRVSYTLGLEGPAVTVDTAC  
 nysta\_003\_KS\_003.seq VFAGVMYSDYGSIL-----GGKEFEGFQGGQGSAGSVASGRVSYALGFEGPAVTVDTAC  
 nysta\_003\_KS\_004.seq VFAGVMYSGYGTTL-----DGAEFEGFQGGQSALSASVLSGRVSYTFGFEPPAVTVDTAC  
 nysta\_003\_KS\_005.seq VFAGVMYSDYSAML-----ASPEFEGFQGGSSPSLASGRVAYTLGLEGPAVTVDTAC  
 nysta\_003\_KS\_006.seq VFAGVMYSDYGSIL-----GGKEFEGFQGGQGSAGSVASGRVSYTLGFEGPAVTVDTAC  
 nysta\_004\_KS\_001.seq VFIAGAMAQDYRVGP-----ADGAEGFQLTGNTGVSLSGRISYTFGTGVPVAVTVDTAC  
 nysta\_004\_KS\_002.seq VFAGVMYSDYSAML-----ASPEFEGFQGGSSPSLASGRVAYTLGLEGPAVTVDTAC  
 nysta\_004\_KS\_003.seq TFVGSYQDYGLGAG-----DGTEGHMVTGSSPSVLSGRLSYVFLGEPVAVTVDTAC  
 nysta\_004\_KS\_004.seq TFVGSYQDYASGVP-NS-----EGSEGHMITGTLSSVLSGRVSYLFGFEPPAVTVDTAC  
 nysta\_004\_KS\_005.seq VFVGTNGQDYPTLLRRA-----SDVAGYVATGNTASVMSGRLSYALGLEGPAVTVDTAC  
 nysta\_004\_KS\_006.seq VFVGGGSDYRPPPE-----AGQWQTAQSASLLSGLRAYTFGIQGPVTVDTAC  
 nysta\_005\_KS\_001.seq AFVGTNGQDYAYLLVRS-----DDATGDVGTGIAAASAGRLSYTLGLEGPAVTVDTAC  
 nysta\_005\_KS\_002.seq VFMGVSGQDYAGLVMRSR-----DDIAGHATTGLAVSVSVSGLRAYALGLEGPAVTVDTAC  
 nysta\_005\_KS\_003.seq VFVGTNGQDYAGLVLRAQ-----EDVEGHAGTGLAASVLSGRLAYAFGFEGPAVTVDTAC  
 nysta\_006\_KS\_001.seq VFVGTNGQDYAHLVLAQ-----DDMGYAGNGLAASVLSGRLAYALGLEGPAVTVDTAC  
 spino\_002\_KS\_001.seq VFVGTNGQDYASWL-RT-----PPPAVAGHVLTGGAAVSVLSGRVAYSFGLGEPVAVTVDTAC  
 spino\_003\_KS\_001.seq VFAGLMYEGYDTGA-HR-----AGEGVEGYLGTGNAGSVASGRVAYAFGFEGPAVTVDTAC  
 spino\_003\_KS\_002.seq TYIGAGSRGYATDV-RQ-----FPPEAEGYLLTGTASVLSGRVAYSFGLGEPVAVTVDTAC  
 spino\_004\_KS\_001.seq VFGGVTPEQYGPQLQE-----MSRNAGGFGLTGRMVSASGRVAYSFGLGEPVAVTVDTAC  
 spino\_004\_KS\_002.seq VFAGLMYHDIYGARFITR-----APEGFEGHLLTGNAGSVLSGRVAYSFGLGEPVAVTVDTAC  
 spino\_004\_KS\_003.seq VFAGTNGQDYHAKVA-----APEAAGHLLTGNAAVSLAGRLSYTFGLGEPVAVTVDTAC  
 spino\_005\_KS\_001.seq VFAGLIYHDIYASRF-RK-----TPAEFEGYFATGNAGSVASGRVAYTFGLGEPVAVTVDTAC  
 spino\_005\_KS\_002.seq VFAGLMHHDYGARFITR-----APEGFEGYLGNGSAGGVFSGRVAYSFGLGEPVAVTVDTAC  
 spino\_005\_KS\_003.seq VFAGLMYHDIYGARFASR-----APEGFEGYLGNGSAGSVASGRISYTFGLGEPVAVTVDTAC  
 tylac\_001\_KS\_002.seq VYAGVMPQEYGPR-LAE-----GAEGSDGYLLTGTSGSVSVGRVAYTLGLEGPAVTVDTAC  
 tylac\_001\_KS\_003.seq VVGLTHQEYASR-LHE-----APEEYEGYLLTGKASVSVGRISYTLGLEGPAVTVDTAC

tylac\_002\_KS\_001.seq VYAGVMYDDYGARVLYGAGAGPPEDLEGYLVNGSAGSIASGRVSYTFGLRGPVAVTNTAC  
 tylac\_003\_KS\_001.seq VYAGVMYHDYGTG-QTS-----ATDTSYSGTGTSGSVVSGRVAYTLGLEGPVAVTVDTAC  
 tylac\_003\_KS\_002.seq VFVGTNGQHYMPLLQNGG-----DSFDGYLGTGNSASVMSGRLSYVFLGLEGPVAVTVDTAC  
 tylac\_004\_KS\_001.seq VYVGAWDSGYTQ-AHA----PSAELEADLLTGGVVSFTSGRIAYTLGLEGPALTVDTAC  
 tylac\_005\_KS\_001.seq VYVGAAGHSYASDRPLVP-----EGSEGYLLTGSADAVMSGRISYALGLEGPMTVETAC  
 nidda\_001\_KS\_002.seq VFVGTTAPEYGPRLHEGT-----DGYEGFLLTGTASVASGRIAYALGTRGPALTVDTAC  
 nidda\_001\_KS\_003.seq VFTGASQQEYGTQSRREA-----DKYGGHLLTGTLASVMSGRVAYTLGLQGPALTVDTAC  
 nidda\_002\_KS\_001.seq VFTGVMYDDYGSRCFPSL-----PEVEGYVVNGSAGSVASGRVAYTLGLQGPALTVDTAC  
 nidda\_003\_KS\_001.seq VFTGVMHHDYGHSHQVGS-----ADASQQLGLGTAGSVASGRVAYTLGLQGPALTVDTAC  
 nidda\_003\_KS\_002.seq VFVGTNGQHYVPLLQSGG--ADGESFDGYISTGNSASVMSGRLSYVFLGLEGPVAVTVDTAC  
 nidda\_004\_KS\_001.seq VFAGAWESGYQKGLDAAD-----AGLEAQLLAGI-VSFTAGRVSYTFGLGLEGPVAVTVDTAC  
 nidda\_005\_KS\_001.seq VFVGAHTGYASDPARAP-----EGTEGYLLTGDADAVLSGRIAYVFLGLEGPALTVETAC  
 monen\_001\_KS\_002.seq VFVGMTQDYGPR-LHE----PSQATDGYLLTGSTPSVASGRLSFSFGLGLEGPALTVDTAC  
 monen\_002\_KS\_001.seq VYAGVSSSEDYMSQLPRIP-----EGFEHATTGSLTSVISGRVAYNYGLEGPVAVTVDTAC  
 monen\_003\_KS\_001.seq VYAGAALPGFGT--PHID-----PAAEGHLVGTGSAPSVLSGRLAYTFGLGLEPAVTDITAC  
 monen\_003\_KS\_002.seq VITGIMYDDYGSRFLAR----KPDGFEGRIMTGSTPSVASGRVAYTFGLGLEPAVTDITAC  
 monen\_004\_KS\_001.seq VYIGAGVLGFGG--AQPD-----KTVEGHLLTGSALSVLSGRISFTLGLGLEGPSVSDTAC  
 monen\_004\_KS\_002.seq TVVGLMYHDYAKSFPTAD-----AQLEGYSYLASTGSMVSGRVAYTLGLEGPVAVTVDTAC  
 monen\_005\_KS\_001.seq VYVGAATTGNQT--QGD-----GGKATEGYAGTAPSVLSGRLSFTLGLGLEGPVAVTVDTAC  
 monen\_005\_KS\_002.seq TVVGVMYHDYAAAG-LQA----DA-QLEGYSMLAGSGSVVSGRVAYTLGLEGPVAVTVDTAC  
 monen\_006\_KS\_001.seq VYAGVSSQDHMSG-SRVP-----PEVEGYATTGTLSSVISGRIAYTFGLGLEGPVAVLDTAC  
 monen\_007\_KS\_001.seq TFIGCDGLDYALGASEVP-----EGTAGYFTIGNSGSVTSGRVAYTLGLEGPVAVTVDTAC  
 monen\_008\_KS\_001.seq VFTGVSADHYLTLISQTA-----SDVEGYIGTGNLGSVVSGRISYTVGLGLEGPVAVTVDTAC  
 monen\_008\_KS\_002.seq VFTGLTIFDYLLALVGEQP-----TEVEGYIGTGNLGCVASGRVAYTLGLEGPVAVTVDTAC  
 oligo\_001\_KS\_002.seq VFVGAASPEYGPRL-LHE----TS-DADGHVLTGTAPSVLSGRIAYVFLGLEGPALTVDTAC  
 oligo\_001\_KS\_003.seq VFVGSNGQDYATL-LGE-----SEVEGHVLTGTASSVLSGRIAYTLGLEGPALTVDTAC  
 oligo\_001\_KS\_004.seq VFVGAAGSHDYGTLL-TSL----EG-GQDYALTGAVGVSLSGRIAYVFLGLEGPALTVDTAC  
 oligo\_002\_KS\_001.seq VFVGMADQKYGPRDGEELL-----DQVKGLVLTGTTSSVASGRIAYSGLQGPALTVDTAC  
 oligo\_002\_KS\_002.seq VFAGAAGSDYGVVLEGAP----EA--DGYLTTGTAASVISGRIAYTLGLHGPVAVTVDTAC  
 oligo\_003\_KS\_001.seq VFAGLNQDYGTLLAAAP-----DGLDSYGSTGTSNSVLSGRISYVFLGLEGPVAVTVDTAC  
 oligo\_003\_KS\_002.seq VFVGAATSGYTSLFPGRS----QA-LAGYVGTGASTSVVSGRVSYVFLGLEGPVAVTVDTAC  
 oligo\_004\_KS\_001.seq VFTGLMYHDYASG-LQA----LPEVEGYLSTGMAASVASGRIAYSFLGLEGPVAVTVDTAC  
 oligo\_004\_KS\_002.seq VFAGVMYHDYCAD-QAV----LPEVEGEFVGTGSAGSVASGRIAYTLGLEGPVAVLDTAC  
 oligo\_005\_KS\_001.seq VYFGGTGGDFAGLLAASP----QA-LDGYMLTGTSSVLSGRVSYVFLGLEGPVAVTVDTAC  
 oligo\_006\_KS\_001.seq VFIGGAPQEYCALVMNSA----EG-AGGYALTGAPGVSLSGRISYVFLGLEGPVAVTVDTAC  
 oligo\_006\_KS\_002.seq VFVGGGQDYPAVLMGSA----EA-GGYGVTGALGSVMSGRVSYVFLGLEGPVAVTVDTAC  
 oligo\_006\_KS\_003.seq VFVGGTAVEYCALLMNSP-----A-SQGYAVTGSSGVSMSGRISYTLGLEGPVAVTVDTAC  
 oligo\_007\_KS\_001.seq VFVGGTAIEHTVKLMNSP-----T-DQGYAITGGSASVMSGRVSYVFLGLEGPALTVDTAC  
 oligo\_007\_KS\_002.seq VFVGGTPQEYTTVLMNSP-----EA-GGYALTGASGVSMSGRVAYALGLEGPVAVTVDTAC  
 rifam\_001\_KS\_001.seq VFSGLMQQYGG--SGA----VAPELEGFVTTGVASSVASGRVSYVFLGLEGPVAVTVDTAC  
 rifam\_001\_KS\_002.seq VFAGVNSHDYSMR-MHR----A-AGVEGFRLTGGASVLSGRVAYHFGVEGPVAVTVDTAC  
 rifam\_001\_KS\_003.seq VFTGIVHHDYVTR-LRE----VPEDVQYTMGTASSVASGRVAYVFGFEGPAVTVDTAC  
 rifam\_002\_KS\_001.seq VYAGVVHQDYAPDLSGFE-----GFMSLERALGTAGGVASGRVAYTLGLEGPVAVTDMC  
 rifam\_002\_KS\_002.seq VFSGVSIHDYELSLNMP-----AELEGFVTTATAGSVASGRVSYTFGFEGPVAVTVDTAC  
 rifam\_002\_KS\_003.seq VFTGMFGQGYVAPGDSV---VTPELEGFAGTGGSSSVASGRVSYVFGFEGPAVTDIDTAC  
 rifam\_003\_KS\_001.seq VFTGAGGSGYGGG--LTG-----PEMQSFAGTGLASSVASGRVSYVFGFEGPAVTDITAC  
 rifam\_004\_KS\_001.seq VFTGVASMGYAG--GGV---VAPELEGFVGTGAAPCIASGRVSYVFLGFEGPAVTVDTC  
 rifam\_005\_KS\_001.seq VFSGVFTQGYG---SGA----ITPDLFAFAGIGAASSVASGRVSYVFLGLEGPVAVTVDTAC  
 rifam\_005\_KS\_002.seq VFAGVSNQGYGMG--ADP-----AELAGYASTAGASSVVSGRVSYVFGFEGPAVTDITAC  
 pikro\_001\_KS\_002.seq VFTGAMTHEYGPSLRD-----GGEGLDGYLLTNTASVMSGRVSYTLGLEGPALTVDTAC  
 pikro\_001\_KS\_003.seq VFIGLSYQDYAARVPNAP-----RGVEGYLLTGSTPSVASGRIAYTFGLGLEPATTVDTAC  
 pikro\_002\_KS\_001.seq VFTGVMYHDYATRLTD-----VPEGIEGYLGTGNSGVSASGRVAYTLGLEGPVAVTVDTAC  
 pikro\_002\_KS\_002.seq VFAGTNGPHYEPPLRN----TAEDLEGYVGTGNAASIMSGRVSYTLGLEGPVAVTVDTAC  
 pikro\_003\_KS\_001.seq VFVGGWHTGYTSGQTTAV---QSPLEGHVLSGAALGFLSGRIAYVFLGTDPALTVDTAC  
 pikro\_004\_KS\_001.seq VYVGCQYQDYAPDIRVAP-----EGTGGYVVTGNSSAVASGRIAYSFLGLEGPVAVTVDTAC  
 Stamb\_001\_KS\_002.seq VFVGATAQDYGPRMHEPA-----ESSEGYLLTGTASVASGRIAYAFALDGPVAVTVDTAC  
 Stamb\_001\_KS\_003.seq VFAGVMYHDYAHA-AEA----LPE-TEGYRATGGAGSVVSGRIAYTYGLEGPVAVTVDTAC  
 Stamb\_001\_KS\_004.seq VFVGTNGQDYAGLFPATG-----SGLEGHVATGSAASVLSGRISYTYGLEGPVAVTVDTAC  
 Stamb\_002\_KS\_001.seq VFAATNGQDYATA-LAA----DPEAADGYLATGAVASVLSGRISYVFLGLEGPALTVDTAC  
 Stamb\_002\_KS\_002.seq VFAGAASSYGLDKALP-----EDVAGYQLTGGATSVLSGRVAYSFLGLEGPVAVTVDTAC  
 Stamb\_003\_KS\_001.seq VFVGAASPSGYDTPVRLP-----ESTVGYQLTGSAGSVLSGRLSYVFLGLEGPVAVTVDTAC  
 Stamb\_003\_KS\_002.seq VLI GAASSGYGLGTDLF-----TTAEGHVLGAGSNSVISGRVAYSFLGLEGPVAVTVDTAC  
 Stamb\_003\_KS\_003.seq VFIGAAHAQYGYMRLP-----DNALGHLMTGTTSVASGRLAYTFGLGLEGPVAVTVDTAC  
 Stamb\_003\_KS\_004.seq VFAGASSSGYGGAGDDL-----EGAGGYLLAGTANSVISGRVAYTFGLGLEGPVAVTVDTAC  
 Stamb\_003\_KS\_005.seq MFVGTNGQDYPPVLAGSA----DEGLDAHAATGNAAAVLSGRVSYAFGLEGPVAVTVDTAC  
 Stamb\_004\_KS\_001.seq VFAGGNDQGYLRLLANE-----PGSVGHQLTGGATAVISGRVAYTLGLEGPVAVLDTAC  
 Stamb\_004\_KS\_002.seq VYVGTATSGYGLGRFVAP-----DGSRPHVLTGTATSVVSGRLAYTFGLGLEGPVAVTVDTAC  
 Stamb\_004\_KS\_003.seq VFVGTSTFVGYGIGAQPQ-----NEAEGFFLAGTGTAASGRIAYSFTFGLGLEGPVAVTVDTAC  
 Stamb\_005\_KS\_001.seq VFAGVMYHDYPSVVDPEA-----LDGYLGTANAGSVLSGRIAYTFGLQGPVAVTVDTAC  
 Stamb\_006\_KS\_001.seq VYVGAAGTSGYIG-VPV----A-EAAAGYALTGTATSVLCGRVAYSFLGFEGPAVTVDTAC  
 Stamb\_006\_KS\_002.seq VFAGTNGQDYPIIL-LAG-----DPDISSEGHQAGNAAAVLSGRIAYTFGFEPTLTVDTAC  
 Stamb\_007\_KS\_001.seq VFIGSSSSYAGTGLRTP-----QGVEGHLLTGSAPSVSASGRVAYALGLEGPVAVTVDTAC  
 Stamb\_007\_KS\_002.seq VFIGASPSGYGVG-VAV-----PGSEGHSLTGMGVSLSGRVAYVFLGLEGPVAVTVDTAC  
 Stamb\_008\_KS\_001.seq VFIGTGTQGYGINMQAGM-----AGTEGYQLTGSATAVLSGRIAYTLGLRGPVAVSDTAC  
 Stamb\_008\_KS\_002.seq VFAGLMYHDYGAT-VTV----LPEGEVGYLGTGTAGSVLAGRVSYTFGLGLEGPVAVTVDTAC  
 Stamb\_009\_KS\_001.seq VFTGVMYNEYSRIMSVP-----DE-VAGHLGTGNSGVSASGRVAYTLGLEGPALTVDTAC  
 Stamb\_009\_KS\_002.seq VYAGTGGQDYLAIV-LAG----DPVAGEYLVTTGSSVLSGRVAYAFGLEGPVAVTVDTAC



lasal\_005\_KS\_001.seq SSSLVALHLACRALRQECSLALAGGVAVLALPTLFQEFSTRQRGLAADGRCKSFAAAADG  
 lasal\_005\_KS\_002.seq SSSLVALHLACQALNRGDCSLALACGVTVMATPQVFTEFSRQRGLAADGRCKAFAAAADG  
 lasal\_006\_KS\_001.seq SSSLVALHWAEQALRRECSLALVAGVTVLPSPLAFIEFSRQRGLAADGRCKPFSAADG  
 lasal\_007\_KS\_001.seq SSSLVALHLACQALNRGECSLALAGGVTVMAVPLGFTEFSRQRGLAPDGRCKAFAAAADG  
 rapam\_001\_KS\_001.seq SSSLVALHQAGYALRQGECSLALVGGVTVMPTPQSFVEFSRQRGLSADGRCKAFADAADG  
 rapam\_001\_KS\_002.seq SSSLVALHQAGYALRQGECSLALVGGVTVMPTPQTFVEFARQGGLAGDGRSKAFADSADG  
 rapam\_001\_KS\_003.seq SSSLVALHLAAQALNRGECSLALVGGVTVMATPELFTFEFSRQRGLASDGRCKAFADSADG  
 rapam\_001\_KS\_004.seq SSSLVALHLAAQALNRGECSMALAGGVTVMATPEVFTEFSRQRGLASDGRCKAFADSADG  
 rapam\_002\_KS\_001.seq SSSLVALHQAAAYALRQGECSLALVGGVTVMATPQSFVEFSRQRGLASDGRCKAFADSADG  
 rapam\_002\_KS\_002.seq SSSLVALYQAGYALRQGECSLALVGGVTVMATPQSFVEFSRKSGLSDSADGRCKAFADSADG  
 rapam\_002\_KS\_003.seq SSSLVALHLAAQALNRGECSMALAGGVTVMATPEVFTEFSRQRGLASDGRCKAFADSADG  
 rapam\_002\_KS\_004.seq SSSLVALHQAGYALRQGECSLALVGGVTVMATPQTFVEFARQGGLAGDGRSKAFADSADG  
 rapam\_002\_KS\_005.seq SSSLVALHQAGYALRQGECSLALVGGVTVMATPHTFVEFSRQRGLASDGRCKAFADSADG  
 rapam\_002\_KS\_006.seq SSSLVALHQAGYALRQGECSLALVGGVTVMPTPQTFVEFSRQRGLSADGRCKAFADAADG  
 rapam\_003\_KS\_001.seq SSSLVALHQAGYALRQGECSLALVGGVTVMATPDVFTEFSRQRGLADGRSKAFADSADG  
 rapam\_003\_KS\_002.seq SSSLVALHQAGYALRQGECSLALVGGVTVMATPQTFVEFSRQGGLASDGRCKAFADAADG  
 rapam\_003\_KS\_003.seq SSSLVALHQAGYALRQGECSLALVGGVTVMATPQSFVEFSRQRGLASDGRCKAFADSADG  
 rapam\_003\_KS\_004.seq SSSLVALHLASQALRQRECSLALVSGVSMSSPAMFVEFSRQRGLSSDGRCKSFSAASADG  
 nysta\_002\_KS\_001.seq SSSLVALHLAAQSLRVGESSLAVIGGVTILTEPSVFEFSAQGGGLAPDGRCKAFSDAADG  
 nysta\_002\_KS\_002.seq SSSLVALHLACQSLRDGECSSALAGGAVMATPHAFVGFSTRQRALAKDGRCKPFSDTADG  
 nysta\_003\_KS\_001.seq SSSLVALHWAVQALRGECSMALAGGASIMATPGPFVAFTAQSGLAADGRCKPFSADRAG  
 nysta\_003\_KS\_002.seq SSSLVALHWAAQALRAGECSLALAGGVTVMSTPSTFVEFSRQRGLAPDGRSKAFAEAADG  
 nysta\_003\_KS\_003.seq SSSLVALHWAAQALRAGECSLALAGGVTVMSTPSTFVEFSRQRGLAPDGRSKAFAEAADG  
 nysta\_003\_KS\_004.seq SSSLVALHLAAQALRGECSSALAGGVTVMSIPDTFIEFSRQRGLAPDGRCKPFSSESADG  
 nysta\_003\_KS\_005.seq SSSLVAMHWAMQALRSGECSLALAGGVTVMSTPAVFVDFARQRGLSPDGRCKAFADAADG  
 nysta\_003\_KS\_006.seq SSSLVALHLAAQALRAGECTLALAGGVTVMSTPGTFVEFSRQRGLAPDGRSKAFAEAADG  
 nysta\_004\_KS\_001.seq SSSLVAVHLATQALRAGECTLALAGGVTVMSTPGTFVEFSRQRGLSADGRCKPFGDTADG  
 nysta\_004\_KS\_002.seq SSSLVAMHWAMQALRSGECSLALAGGVTVMSTPAVFVDFARQRGLSPDGRCKAFADAADG  
 nysta\_004\_KS\_003.seq SSSLVALHLACQSLRNGESNLAVAGGATIMTTPNPFIAFSRQRALAKDGRCKAFSDDADG  
 nysta\_004\_KS\_004.seq SSSLVAMHLACQSLRNGESSLALAGGVTVMSTPMSFVGFSTRQRALAEADGRCKAFADGADG  
 nysta\_004\_KS\_005.seq SSSLVALHWAGRALRAGECDLVVAGGVSMASPDSFVEFSTQGGGLAPDGRCKAFSDAADG  
 nysta\_004\_KS\_006.seq SSSLVALHLAAQALRGECSSALAGGVTVMATPVGFVEFSAQGGALSADGRCKAFSDDANG  
 nysta\_005\_KS\_001.seq SSSLVALHLAVQALRNGECGMALAGGVTVMSTPGSLVEFSRQGGGLARDGRCKAFADAADG  
 nysta\_005\_KS\_002.seq SSSLVSLHLAAQALRAGECTMALAGGVTVMTTANFTGFSRMGGLAQDGRCKAFSDSADG  
 nysta\_005\_KS\_003.seq SSSLVALHWAVQALRAGECSLALAGGVTVMTTSTSFAGFTRQGGGLAPDGHCKAFSDSADG  
 nysta\_006\_KS\_001.seq SSSLVTLHLAAQAVRAGECSLALAGGVTVMTTSSSFAGFLQGGGLAPDGRCKAFADAADG  
 spino\_002\_KS\_001.seq SSSLVALHLAQALRAGECDLALAGGVTVMSTPKVFLEFSRQRGLAPDGRCKSFAGAGADG  
 spino\_003\_KS\_001.seq SSSLVALHLACQSLRQGECDLALAGGVTVMSTPERFVEFSRQRGLAPDGRCKSFAAAADG  
 spino\_003\_KS\_002.seq SSSLVALHLACQSLRSGECDLALAGGVTVMSTPEMFVEFSRQRGLAPDGRCKSFSAESADG  
 spino\_004\_KS\_001.seq SSSLVALHLACQSLRSGECDLALAGGVTVMATPATFVEFSRQRGLAPDGRCKSFAAAADG  
 spino\_004\_KS\_002.seq SSSLVALHLAQALRAGECEFALAGGVTVMSTPTTFVEFSRQRGLAPDGRCKSFAAAADG  
 spino\_004\_KS\_003.seq SSSLVALHLACQSLRSGECDMALAGGVTVMSTPLAFLEFSRQRGLAPDGRCKSFAAAADG  
 spino\_005\_KS\_001.seq SSSLVALHLACQSLRLGECDLALAGGIVSMATPGAFFVEFSRQRALASDGRCKPFADAADG  
 spino\_005\_KS\_002.seq SSSLVALHLAQALRSGECDLALAGGVTVMATPGMFVEFSRQRGLAADGRCKPFAAAADG  
 spino\_005\_KS\_003.seq SSSLVALHLAQSLRSGECDLALAGGVTVMSTPGTFVEFSRQRGLAPDGRCKSFSAESADG  
 tylac\_001\_KS\_002.seq SSSLVALHLAVQALRGECMDALAGGVTVMAGPGMFVEFSRQRGLAADGRCKAFADGADG  
 tylac\_001\_KS\_003.seq SSSLVALHNAQALRGECMDALAGGVTVMAAPGLFVEFSRQRGLAADGRCKAFADGADG  
 tylac\_002\_KS\_001.seq SSSLVSLHLAVRALRRGECMDALAGGATVLTSTPTVLFVDFSRQRGLAPDGRCKAFADAADG  
 tylac\_003\_KS\_001.seq SSSLVALHLAVQALRGECMDALAGGVTVMAGPGMFVEFSRQRGLAADGRCKAFADGADG  
 tylac\_003\_KS\_002.seq SASLVALHLAVQAMRRGECMDALVGGATVMSTPEMLVDFSRQRVI SANGRSRAFAAGADG  
 tylac\_004\_KS\_001.seq SSSLVALHNAQALRRGECDLALAGGVTVMATPAVFVQFARQRGLAPDGRCKAFADAADG  
 tylac\_005\_KS\_001.seq SSSLVALHLAVRALRRGECGLALAGGVAVMADPAAFVEFSRQRGLAADGRCKAFADAADG  
 nidda\_001\_KS\_002.seq SSSLVALHLAVQSLRRGECDLALAGGTVMSGPGMFVEFSRQRGLAPDGRCKAFSADADG  
 nidda\_001\_KS\_003.seq SSSLVALHLAVQSLRRGECDLALAGGTVMSTPTVFVEFSRQRGLAPDGRCKPFADTADG  
 nidda\_002\_KS\_001.seq SSSLVALHLAVQSLRRGECDLALAGGTVMSTPTVFVEFSRQRGLAPDGRCKSFADTADG  
 nidda\_003\_KS\_001.seq SSSLVALHLAVQSLRRGECDLALAGGTVMATPTVFVEFSRQRGLAPDGRCKPFADTADG  
 nidda\_003\_KS\_002.seq SASLTALHLSVQSLRRGECDLALVSGATVMATPEMLVDFARQRASIPDGRCKAFAEAADG  
 nidda\_004\_KS\_001.seq SSSLVALHLAVQSLRRRECDLALAGGATVIADPALLVQFSRQRALAPDGRCKAFAEAADG  
 nidda\_005\_KS\_001.seq SSSLVALHLAVQSLRRGECDLALAGGVAVMPDPTVFVEFSRQRGLAPDGRCKAFADSADG  
 monen\_001\_KS\_002.seq SSSLVTLHLAAQALRRGECDLALAGGATVLTATPGMFTEFSRQRGLAPDGRCKPFAGAADG  
 monen\_002\_KS\_001.seq SASLVAIHLASQALRQRECDLALAGGVTVLSSPLMFTEFCRQRGLAPDGRCKPFAAAADG  
 monen\_003\_KS\_001.seq SSSLVAVHLAAHALRQRECDLALAGGVTVMTTPYVFTEFSRQRGLAADGRCKPFAAAADG  
 monen\_003\_KS\_002.seq SSSLVAMHLAAQALRQGECELALAGGVTVMATPNTFVEFSRQRGLAPDGRCKPFAAAADG  
 monen\_004\_KS\_001.seq SSSLVSMHLAAQALRQGECDLALAGGVTVMSTPGAFTFEFSRQRGLASPDGRSKAFASAADG  
 monen\_004\_KS\_002.seq SSSLVSIHLATQALRHGECDLALAGGVTVMADPDMFAGFSRQRGLSPDGRCKAYAAAADG  
 monen\_005\_KS\_001.seq SSSLVAMHLAANALRQGECDLALAGGVTVMSTPEVFTGFSRQRGLAPDGRCKPFAAAADG  
 monen\_005\_KS\_002.seq SSSLVSIHLAAQALRQGECDLALAGGVTVMATPEVFTGFSRQRGLAPDGRCKPFAAAADG  
 monen\_006\_KS\_001.seq SASLVAIHLACQALRQGECDLALAGGVTVLSTPTAFVFEFSRQRGLAPDGRCKPFAGAADG  
 monen\_007\_KS\_001.seq SSSLVSLHLATQALRTQECSSALAGGVTVMSSPAPLIGFSELRLGLAPDGRCKPFSASSDG  
 monen\_008\_KS\_001.seq SSSLVAIHLASQALRQGECSLALAGGTVMATPGSFTEFSRQRGLAPDGRCKPFAAAADG  
 monen\_008\_KS\_002.seq SSSLVAIHQAAHALRQGECSLALAGGATVMATPGSFVEFSRQRGLAKDGRCKPFAAAADG  
 oligo\_001\_KS\_002.seq SSSLVALHLAAQALRGECDLALAGGVTVMATSGMFAEFARQGGGLAPDGRCKPFAGAADG  
 oligo\_001\_KS\_003.seq SSSLVALHLAVQALNAGECDLALAAGGVTVMSSPEIFVEFSRQRGLSADGRCKAFGPDADG  
 oligo\_001\_KS\_004.seq SSSLVALHLAAQALRGECDDALAGGVAVMATPDAFDFARQGGGLAPDGRCKAFADGADG  
 oligo\_002\_KS\_001.seq SSSLVALHLAVRALRSGECSFALVGGAAVMAEPQLFAEMAEQGMAGDGRCKAFAAAADG  
 oligo\_002\_KS\_002.seq SSSLVALHMVAGLHQGECDLALATGVSIVSTPGAFFVDFARQGLAADGRCKAFASAADG  
 oligo\_003\_KS\_001.seq SSSLVTLHLAAQALRSGECDLALAGGATVLTSTSAHVHVALSGQRALAPDGRSKAFSAADG



ampho\_003\_KS\_003.seq VGWSEGVGMLLLERQSDAIRNGHEILAVVRGSAVNQDGA-SNGLTAPNGFPSQQRVIRQAL  
 ampho\_003\_KS\_004.seq VGWSEGVGMLLLERQSDAIRNGHRVLA VVRGSAVNQDGA-SNGLTAPNGFPSQQRVIRQAL  
 ampho\_003\_KS\_005.seq VGWSEGVGMLVLERQSDAIRNGHEILAVVRGSAVNQDGA-SNGLTAPNGFPSQQRVIRQAL  
 ampho\_003\_KS\_006.seq VGWSEGVGMLVLERQSDAIRNGHEILAVLRGSAVNQDGA-SNGLTAPNGFPSQQRVIRQAL  
 ampho\_004\_KS\_001.seq TGWAEVGIVLVERLSDAIRNGREILAVVRGTAVNQDGA-SNGLTAPNGFPSQQA VIEQAL  
 ampho\_004\_KS\_002.seq VGWSEGVGMLVLERQSDAIRNGHQILAVVRGSAVNQDGA-SNGLTAPNGFPSQQRVIRQAL  
 ampho\_004\_KS\_003.seq MTLAEGVGLVVERLSDARRNGHPVLA VVRGSAVNQDGA-SNGLSAPNGFPSQQRVIRQAL  
 ampho\_004\_KS\_004.seq MTLAEGVGLILLERLSDARRNGHEVLA VVRGSAVNQDGA-SNGLTAPNGFPSQQRVIRQAL  
 ampho\_004\_KS\_005.seq TAWSEGVGILLVVERLSDAIRNGHEVIRGTAVNQDGA-SNGLTAPNGFPSQQRVIRQAL  
 ampho\_004\_KS\_006.seq TGWSEGVGMLVVERLSDARRNGHRVLA VVRGSAVNQDGA-SNGLTAPNGSPAQQRVIRQAL  
 ampho\_005\_KS\_001.seq TGWSEGAAVLALERLSDAQRRNGHPVLA VVRGSAVNQDGA-SNGLTAPNGFPSQQRVIRQAL  
 ampho\_005\_KS\_002.seq TGWSEGAAVLVVERLSDARRAGHRVLA VVRGSAVNQDGA-SNGLTAPNGFPSQQRVIRQAL  
 ampho\_005\_KS\_003.seq TGWSEGAAVLVVERLSDARRAGHRVLA VVRGSAVNQDGA-SNGLTAPNGFPSQQRVIRQAL  
 ampho\_006\_KS\_001.seq TGWSEGVGMILLVERLSEARRKGHVLA VVRGSAVNQDGA-SNGLSAPNGSPAQQRVIRQAL  
 averm\_001\_KS\_001.seq TGWSEGVGMLLVERLSDAVRLGHRVLA VVRGSAVNQDGA-SNGLTAPNGSPAQRVIRQAL  
 averm\_001\_KS\_002.seq TGWSEGVGMLLVERLSDAHRNGHRVLA VVRGSAVNQDGA-SNGLTAPNGFPSQQRVIRQAL  
 averm\_002\_KS\_001.seq TGWSEGVGMLLVERLSDARRNGHRVLA VVRGSAVNQDGA-SNGLTAPNGRSQVKVIRQAL  
 averm\_002\_KS\_002.seq TGWSEGVGMLLVERLSDARRLGHRI LA VVRGSAVNQDGA-SNGLTAPNGFPSQERVIRLAL  
 averm\_002\_KS\_003.seq TGWSEGVGMLLVERLSDARRNGHRVLA VVRGSAVNQDGA-SNGLTAPNGFPSQQRVIRQAL  
 averm\_002\_KS\_004.seq TGWAEGVGMLLVERLSDARRNGHRVLA VVRGSAVNQDGA-SNGLTAPNGFPSQQRVIRQAL  
 averm\_003\_KS\_001.seq TGMGEGVGMILLVERLSDAVRLGHRVLA VVRGSAVNQDGA-SNGLTAPNGSPAQRVIRQAL  
 averm\_003\_KS\_002.seq TGWSEGVGMLLVERLSDARRNGHRVLA VVRGSAVNQDGA-SNGLTAPNGFPSQQRVIRQAL  
 averm\_003\_KS\_003.seq TGWAEGVGMLLVERLSDARRNGHRVLA VVRGSAVNQDGA-SNGLTAPNGFPSQQRVIRQAL  
 averm\_004\_KS\_001.seq TGMSEGVGILLERLSDAERRNGHRVLA VVRGSAVNQDGA-SNGLTAPNGFPSQQRVIRQAL  
 averm\_004\_KS\_002.seq VGWAEGVGVLVVERLSEARRNGHRVLA VVRGSAVNQDGA-SNGLTAPNGFPSQQRVIRQAL  
 averm\_004\_KS\_003.seq VGWAEGVGVLVVERLSEARRNGHRVLA VVRGSAVNQDGA-SNGLTAPNGFPSQQRVIRQAL  
 borre\_002\_KS\_001.seq MGFGEVGVVLERLSVARRNGHRVLA VVRGSAVNQDGA-SNGLTAPNGFPSQQRVIRQAL  
 borre\_003\_KS\_001.seq TGWSEGVGLVVERLSVARRNGHRVLA VVRGSAVNQDGA-SNGLTAPNGFPSQQRVIRQAL  
 borre\_003\_KS\_002.seq VAWAEGAGILLVVERLSAARRNGHRVLA VVRGSAVNQDGA-SNGLTAPNGFPSQQRVIRQAL  
 borre\_004\_KS\_001.seq TGFGEVGVVLERLSDARRNGHEVLA VVRGSAVNQDGA-SSGFTAPNGFPSQQDVIREAL  
 borre\_005\_KS\_001.seq MGMAEGVGVVLERLSEARRNGHEVLA VVRGSAVNQDGA-SNGLSAPNGSPAQQRVIQSAL  
 borre\_006\_KS\_001.seq AGFAEGVGVVLERLSVARRNGHRVLA VVRGSAVNQDGA-SNGLTAPNGFPSQQRVIRQAL  
 epoth\_002\_KS\_001.seq TIMGNGCGVLLKPLDRALSDGDPVRAVILGSA TNNDGARKIGFTAPSEVQQAIMEAL  
 epoth\_003\_KS\_001.seq FVRGEGCGLVVLKRLSDAQRDGDRIWALIRGSA INHDGR-STGLTAPNVLAQETVLRREAL  
 epoth\_003\_KS\_002.seq YARAEGCAVVVLLKRLSDAQRDRDPI LA VVRGTAINHDGP-SSGLTVPSPGAQEALLRQAL  
 epoth\_003\_KS\_003.seq YARGEGCAVVVLLKRLSDAQRDAGDSI LALIRGSAVNHDGP-SSGLTVPSPGAQEALLRQAL  
 epoth\_003\_KS\_004.seq VGWSEGCAMLLKPLRDAQRDGDPI LA VVRGTAVNQDGR-SNGLTAPNGSSQQEVIRRAL  
 epoth\_004\_KS\_001.seq FVRGEGCGLVVLKRLSDARRDGDRIWALIRGSA INQDGR-STGLTAPNVLAQGALLREAL  
 epoth\_004\_KS\_002.seq FARAEGCAVVVLLKRLSDAQRDRDPI LA VVRSTAINHDGP-SSGLTVPSPGAQALLGQAL  
 epoth\_005\_KS\_001.seq FVRGEGCGMVLLKRLSDAQRNGDRIWALIRGSA MNQDGR-STGLMAPNVLAQEALLRQAL  
 lasal\_001\_KS\_002.seq TGWAEAGVLLVERLSDARRNGHRVLA VVRGSAVNQDGA-SNGLTAPNGLSQQRVIRQAL  
 lasal\_001\_KS\_003.seq TGWSEGVGLLLVERLSDARRNGHRVLA VVRGSAVNQDGA-SNGLTAPNGFPSQQRVIRQAL  
 lasal\_002\_KS\_001.seq TGFSEGVGVLVVERLSDARRNGHRVLA VVRGSAVNQDGA-SNGLTAPNGFPSQQRVIRQAL  
 lasal\_002\_KS\_002.seq TAWSEGVGVLVVERLSDARRNGHRVLA VVRGSAVNQDGA-SNGLTAPNGFPSQQRVIRQAL  
 lasal\_002\_KS\_003.seq TGFSEGVGVLVVERLSDARRNGHQVLA VVRGSAVNQDGA-SNGLTAPNGFPSQQRVIRQAL  
 lasal\_003\_KS\_001.seq FGPSEGAGVLLVERLSDARRNGHRVLA VVRGSAVNQDGA-SNGLSAPNGFPSQQRVIRQAL  
 lasal\_004\_KS\_001.seq TNWAEVAVLVVERLSDARRNGHRVLA VVRGTAINQDGA-SNGLSAPNDLAQERVIRQAL  
 lasal\_005\_KS\_001.seq TGFSEGVGMLLVERLSDAQAKGHQVLA VVRGSAVNQDGA-SNGLTAPNGFPSQQRVIRQAL  
 lasal\_005\_KS\_002.seq TGFSEGVGVLVVERLSDARRNGHQVLA VVRGSAVNQDGA-SNGLTAPNGFPSQQRVIRQAL  
 lasal\_006\_KS\_001.seq FGFAEGVALLVQRLTDARREGREVLAVIRGSA VNQDGA-SNGLTAPNGFPSQQRVIRQAL  
 lasal\_007\_KS\_001.seq TGFSEGVGVLVVERLSDARRNGHQVLA VVRGSAVNQDGA-SNGLTAPNGFPSQQRVIRQAL  
 rapam\_001\_KS\_001.seq TEWAEVGVLLVERLSDAQAKGHQVLA VVRGSAVNQDGA-SNGLSAPNGFPSQQRVIRQAL  
 rapam\_001\_KS\_002.seq AGFSEGVGVLVVERLSDARRNGHQVLA VVRGSAVNQDGA-SNGLTAPNGFPSQQRVIRQAL  
 rapam\_001\_KS\_003.seq TGWAEVGVLLVERLSDAQAKGHQVLA VVRSSAVNQDGA-SNGLTAPNGFPSQQRVIRQAL  
 rapam\_001\_KS\_004.seq AGFSEGAGLLLVERLSDARRNGHQVLA VVRGSAVNQDGA-SNGLTAPNGFPSQQRVIRQAL  
 rapam\_002\_KS\_001.seq TGWAEVGVLLVERLSDAQAKGHQVLA VVRGSAVNQDGA-SNGLSAPNGFPSQQRVIRQAL  
 rapam\_002\_KS\_002.seq TGWAEVGVLLVERLSDAQAKGHQVLA VVRSSAVNQDGA-SNGLSAPNGFPSQQGVIRQAL  
 rapam\_002\_KS\_003.seq AGFSEGAGLLLVERLSDARRNGHQVLA VVRGSAVNQDGA-SNGLTAPNGSPAQQRVIRQAL  
 rapam\_002\_KS\_004.seq AGFSEGVGVLVVERLSDAQAKGHQVLA VVRSSAVNQDGA-SNGLTAPNGFPSQQRVIRQAL  
 rapam\_002\_KS\_005.seq TGWSEGVGVLVVERLSDAQAKGHQVLA VVRSSAVNQDGA-SNGLSAPNGFPSQQRVIRQAL  
 rapam\_002\_KS\_006.seq TGWAEVGVLLVERLSDAQANGHQI LA VVRSSAVNQDGA-SNGLSAPNGFPSQQRVIRQAL  
 rapam\_003\_KS\_001.seq AGFSEGIVLLVERLSDAEAKGHQVLA VVRSSAVNQDGA-SNGLTAPNGFPSQQRVIRQAL  
 rapam\_003\_KS\_002.seq TGWAEVGVLLVERLSDARRNGHQVLA VVRGSAVNQDGA-SNGLTAPNGFPSQQRVIRQAL  
 rapam\_003\_KS\_003.seq TGWAEVGVLLVERLSDAQAKGHQVLA VVRSSAVNQDGA-SNGLTAPNGFPSQQRVIRQAL  
 rapam\_003\_KS\_004.seq TIWSEGVGVLLVERLSDARRLGHVLA TVRGS AVNSDGA-SNGLTAPNGTSPQQRVIRQAL  
 nysta\_002\_KS\_001.seq TGWAEVGVLLVVERLSDAQRNGHPVLA VVRGSAVNQDGA-SNGLTAPNGFPSQERVIRQAL  
 nysta\_002\_KS\_002.seq MTLAEGVGVLLERLSHARANGHRVLA VVRGSAVNQDGA-SNGLTAPNGFPSQQRVIRQAL  
 nysta\_003\_KS\_001.seq TGWSEGAGMLMRLSDAQRNGHPVLA VVRGSAVNQDGA-SNGLTAPNGFPSQQRVIRQAL  
 nysta\_003\_KS\_002.seq VAWSEGVGMLVLERQSDAVRNGHEI LA VVRGSAVNQDGA-SNGLTAPNGFPSQQRVIRQAL  
 nysta\_003\_KS\_003.seq VGWSEGVGILLVVERQSDAVRNGHEI LA VVRGSAVNQDGA-SNGLTAPNGFPSQQRVIRQAL  
 nysta\_003\_KS\_004.seq VGWSEGVGMLLLERQSDAVRNGHQI LA VVRGSAVNQDGA-SNGLTAPNGFPSQQRVIRQAL  
 nysta\_003\_KS\_005.seq VGWSEGVGVLVVERQSDAVRNGHEI LA VVRGSAVNQDGA-SNGLTAPNGFPSQQRVIRQAL  
 nysta\_003\_KS\_006.seq VGWSEGVGILLVVERQSDAVRNGHEI LA VVRGSAVNQDGA-SNGLTAPNGFPSQQRVIRQAL  
 nysta\_004\_KS\_001.seq TGWAEVGVILLVVERLSDAVVRNGHEI LA VVRGTAVNQDGA-SNGLTAPNGFPSQQVIRQAL  
 nysta\_004\_KS\_002.seq VGWSEGVGVLLVVERQSDAVRNGHEI LA VVRGSAVNQDGA-SNGLTAPNGFPSQQRVIRQAL  
 nysta\_004\_KS\_003.seq MTLAEGVGVLLVVERLSDAQRNGHPVLA VVRGSAVNQDGA-SNGLTAPNGFPSQQRVIRQAL  
 nysta\_004\_KS\_004.seq MTLAEGVGLVLLERLSDARRANGHQVLA VVRGSAVNQDGA-SNGLTAPNGFPSQQRVIRQAL

nysta\_004\_KS\_005.seq TAWSEGIVLVLERLSAARRNGHVQLGLIRGTAVNQDGA-SNGLTAPNGLSQQRVIAQAL  
nysta\_004\_KS\_006.seq TGWSEGVMVVERLSDARRNGHRVLA VLRGSAINQDGA-SNGLTAPSGPAQQRVIRQAL  
nysta\_005\_KS\_001.seq TGWSEGAVLLLERLSDAQRNGHPVLA VVRGSAVNQDGA-SNGFTAPNGPSQQRVIRQAL  
nysta\_005\_KS\_002.seq TGWSEGA AVLVLERLSDARRAGHRVLA VVRGSAVNQDGA-SNGLTAPNGPAQQRVIRQAL  
nysta\_005\_KS\_003.seq TGWSEGAVLVVERRS DALRNGHEILA VVRGSAVNQDGA-SNGLTAPNGPAQQRVIRQAL  
nysta\_006\_KS\_001.seq TGWSEGI GLLVLERLSDAQRNGHPVLA VLRGSAVNQDGA-SNGLSAPNGPSQQRVIRQAL  
spino\_002\_KS\_001.seq TGWEGAGL LLLERLSDARRNGHEVLA VVRGSAVNQDGA-SNGLTAPNGSSQQRVITQAL  
spino\_003\_KS\_001.seq TGWEGAGLV LLERLSDARRNGHRVLA VVRGSAVNQDGA-SNGLTAPNGLAQERVIQQAL  
spino\_003\_KS\_002.seq TGWEGAGL LLLERLSDAHRNGHRVLA VVRGSAVNQDGA-SNGLAAPNGPSQQRVINQAL  
spino\_004\_KS\_001.seq TGWEGAGLV LLERLSDARRNGHEVLA VVRGSAVNQDGA-SNGLTAPNGPSQQRVITQAL  
spino\_004\_KS\_002.seq TGWEGAGLV LLERLSDARRNGHEVLA VVRGSAVNQDGA-SNGLTAPNGPSQQRVITQAL  
spino\_004\_KS\_003.seq TGWEGAGLV LLERLSDARRNGHRVLA VVRGSAVNQDGA-SNGLTAPNGPSQQRVIRQAL  
spino\_005\_KS\_001.seq TGWEGAGM LLLERLSDARRNGHPVLA AVVGSAINQDGT-SNGLTAPSGPAQQRVIRQAL  
spino\_005\_KS\_002.seq TGWEGAGLV LLERLSDARRNGHAVLA VVRGSAVNQDGA-SNGLTAPNGPSQQRVITQAL  
spino\_005\_KS\_003.seq TGWEGAGLV LLERLSDARRNGHRVLA VVRGSAVNQDGA-SNGLTAPNGPSQQRVITQAL  
tylac\_001\_KS\_002.seq TAWAEGAVV LVERLSDARRLGHPVLA VVCGSAVNQDGA-SNGLTAPSGPSQQRVIRQAL  
tylac\_001\_KS\_003.seq TAWAEGAVV LVERLSDARRLGHPVLA VVCGSAVNQDGA-SNGLTAPSGPSQERVIRQAL  
tylac\_002\_KS\_001.seq TSWAEGAGM LLLQRLSDARREGRPVLA VVRGSAVNQDGA-SNGLTAPNGRAQRVIEDAL  
tylac\_003\_KS\_001.seq TAWAEGAVV LVERLSDARRLGHPVLA VVCGSAVNQDGA-SNGLTAPSGPSQERVIRQAL  
tylac\_003\_KS\_002.seq VALGEGVGL LVERLSDARRNGHPVLA VVRGSAVNQDGA-SNGLTAPNGPSQQRVIRQAL  
tylac\_004\_KS\_001.seq FGPAEGVMV LVERLSDARRLGHPVLA VVCGSAVNQDGA-SNGLTAPSGPSQERVIRQAL  
tylac\_005\_KS\_001.seq TGWAEAGV LVLVERLSDARRAGHTV LGLVGTAVNQDGA-SNGLTAPNGPAQQRVIAEAL  
nidda\_001\_KS\_002.seq TAWAEGVM LLLVERLSDAERLGHRVLA VVRGTAVNQDGA-SNGLTAPSGPAQQQVIRDAL  
nidda\_001\_KS\_003.seq TAWAEGV LLLVERLSDAERLGHRVLA VVRGTAVNQDGA-SNGLTAPNGPSQQRVIRDAL  
nidda\_002\_KS\_001.seq TAWAEGV LLLVERLSDAERLGHRVLA VVRGTAVNQDGA-SNGLTAPSGPAQQQVIRDAL  
nidda\_003\_KS\_001.seq TAWAEGV MLLVERLSDAERLGHRVLA VVRGTAVNQDGA-SNGLTAPSGPAQQQVIRDAL  
nidda\_003\_KS\_002.seq VGLAEGAV LLLVERLSDAERLGHRVLA VVRGTAVNQDGA-SNGLTAPSGPAQQQVIRDAL  
nidda\_004\_KS\_001.seq FGPAEGAGM LLLVERLSDAERLGHRVLA VVRGTAVNQDGA-SNGLTAPSGPAQQQVIRDAL  
nidda\_005\_KS\_001.seq TAWAEGVM LLLVERLSDAERLGHRVLA VVRGTAVNQDGA-SNGLTAPSGPAQQKVIRDAL  
monen\_001\_KS\_002.seq TGWAEAGV LVLVERLSAARRKGHAVLA VIRGSAINQDGA-SNGLTAPNGPSQQRVIRAAAL  
monen\_002\_KS\_001.seq TGFSEGI GLLLERLSDARRNGHKVLA VIRGSAVNQDGA-SNGLTAPNDAAEQVIRAAAL  
monen\_003\_KS\_001.seq TAFSEAGL LVLVERLSDARRNGHRVLA VIRGSAVNQDGA-SNGLTAPNGPSQQRVIRAAAL  
monen\_003\_KS\_002.seq TGWEGAGL VVLERLSDARRKGRVLA LLRGSAVNQDGA-SNGMTAPNGPSQERVIRTAAL  
monen\_004\_KS\_001.seq TGFSEAGL LLLERLSDARRNGHKVLA VIRGSAVNQDGA-SNGLTAPNGPSQERVIRAAAL  
monen\_004\_KS\_002.seq VGFSEGV LLLERLSDARRHGRRV LGVVRGSAVNQDGA-SNGLTAPNGPSQERVIRQAL  
monen\_005\_KS\_001.seq TGWEGAGL LLLERLSDARRKGHKVLAVIRGSAINQDGA-SNGFTAPNGPSQQRVIRQAL  
monen\_005\_KS\_002.seq TGWEGGV LLLERLSDARRHGRRV LGVVRGSAVNQDGA-SNGLTAPNGPSQERVIRQAL  
monen\_006\_KS\_001.seq TGFSEGV LILLERLSDARRNGHVQLV VVRGSAVNQDGA-SNGLTAPNDVAQERVIRQAL  
monen\_007\_KS\_001.seq MGMAEGTGV LLLERLSDARRKGHKVLAVIRGSAINQDGA-SNGLTAPNGPAQERVIRAAAL  
monen\_008\_KS\_001.seq TGWEGAGV LLELLERLSDARRRGHKVLA VIRGSATNQDGT-SNGLAAPNGPSQQRVIRAAAL  
monen\_008\_KS\_002.seq TGWAEAGV LVLVERLSAARRNGHNVLA VIRGSAINQDGT-SNGLTAPNGQAQQRVIRQAL  
oligo\_001\_KS\_002.seq TGWEGEGV M LAVQRLSDAVRDGRPVLA VVRGSAVNSDGA-SNGLTAPNGPSQQRVIRQAL  
oligo\_001\_KS\_003.seq TGWEGGV T VLLERLSDARRLGH DVLGVVRGTAVNQDGA-SNGLSAPNGPAQQRVIRQAL  
oligo\_001\_KS\_004.seq TGWEGGV LVLTRLSEARRRGHDVLA VVRGSAVNSDGA-SNGLTAPNGPSQQRVIRQAL  
oligo\_002\_KS\_001.seq TGWEGGV LLLQPLSTAREQGLPVLA TVRGTAVNQDGA-SNGLTAPNGPAQRRVIRKAL  
oligo\_002\_KS\_002.seq TNWAEAGV LVLVERLSDARRNGHRVLA TVRGSAVNSDGA-SNGLSAPNGGAQQRVIRQAL  
oligo\_003\_KS\_001.seq AGWSEGV LLAVERLSDARRLGH RVLAVLRGSAVNQDGA-SNGLTAPNGPSQQRVIRQAL  
oligo\_003\_KS\_002.seq TGWAEAGV LLAVERLSDARRLGH RVLAVLRGSAVNQDGA-SNGLTAPNGPSQQRVIRQAL  
oligo\_004\_KS\_001.seq VGWEGSALLV LVERLSDARRRGHVLA IVRGSAVNQDGA-SNGLTSPNGPSQQRVITQAL  
oligo\_004\_KS\_002.seq TGWEGAGL LLLERLSDARRNGHPVLA VVRGTAVNQDGA-SNGLTAPNGPAQQRVIEQAL  
oligo\_005\_KS\_001.seq TGWEGGV LVLVERLSDARRAGHPVLA VVRETGINQDGA-SNGLTAPSGPAQRRLILRTL  
oligo\_006\_KS\_001.seq TGWEGAGV LAVQRLTDARRDGHVLA VIRGSAVNQDGA-SNGLSAPNGPSQQRVIRQAL  
oligo\_006\_KS\_002.seq TGWEGGV M VVVERLSDARRNGHEVLA VIRGSAINQDGA-SNGLSAPNGPSQQRVIRQAL  
oligo\_006\_KS\_003.seq IGWEGGV M VVVERLSDARRNGHEVLA VIRGSAINQDGA-SNGLSAPNGPSQQRVIRQAV  
oligo\_007\_KS\_001.seq IGWEGAAV VLLERLADARRNGHPVLA VIRGSAVNQDGA-SNGLSAPNGPSQQRVIRQAV  
oligo\_007\_KS\_002.seq TGWEGGV M LAVQRLSDAVRDGRPVLA VVRGSAVNSDGA-SNGLTAPNGPSQQRVIRQAL  
rifam\_001\_KS\_001.seq TGWSEGV VV LVERLSVARERGHRI LA VLRGSAVNQDGA-SNGLTAPNGLSQQRVIRRAL  
rifam\_001\_KS\_002.seq TGWSEGVL L LVERLSAQRRGHQVLA VVRGSAVNSDGA-SNGLTAPNGPSQQRVIRKAL  
rifam\_001\_KS\_003.seq TGWAEAGV VV LVERLSVARERGH RVLAVLRGSAVNQDGA-SNGLTAPNGPSQQRVIRGAL  
rifam\_002\_KS\_001.seq SGWAEAGV V L LVERLSVARERGHQVLA VIRGSAVNQDGA-SNGLTAPNGPAQQRVIRKAL  
rifam\_002\_KS\_002.seq TVLSEGV I VV LVERLSVARERGH RVLAVLRGSAVNQDGA-SNGLTAPNGPSQQRVIRSAAL  
rifam\_002\_KS\_003.seq TGWAEAGV V I LVERLSVARERGH RILAVLRGSAVNQDGA-SNGLTAPNGPSQQRVIRRAL  
rifam\_003\_KS\_001.seq MVLAEGISV VV LVERLSVARERGH RVLAVLRGSAVNQDGA-SNGLTAPNGPSQQRVIRAAAL  
rifam\_004\_KS\_001.seq MGLAEGV G VIALERLSVARERGH RVLAVLRGIAVNQDGA-SNGLTAPNGPSQQRVIRAAAL  
rifam\_005\_KS\_001.seq TGWAEAGV LVLVERLSVAQERGHRI LA VLRGSAVNQDGA-SNGLTAPNGPSQQRVIRKAL  
rifam\_005\_KS\_002.seq TGWAEAGV VV LVERLSVARERGH RVLAVLRGSAVNSDGA-SNGLTAPNGPSQQRVIRRAL  
pikro\_001\_KS\_002.seq TSWSEGV V L LVERLSDARRNGHVQLAVVRGSALNQDGA-SNGLTAPNGPSQQRVIRRAL  
pikro\_001\_KS\_003.seq FGAAEGV L L LVERLSDARRNGHPVLA VVRGTAVNQDGA-SNGLTAPNGPSQQRVIRQAL  
pikro\_002\_KS\_001.seq TSWSEGV V L LVERLSDARRKGHRI LA VVRGTAVNQDGA-SSGLTAPNGPSQQRVIRRAL  
pikro\_002\_KS\_002.seq FGPAEGV M L LVERLSDARRNGHRVLA VVRGSAVNQDGA-SNGLTAPNGPSQQRVIRRAL  
pikro\_003\_KS\_001.seq FGPAEGAV L L LVERLSDARRNGHRILAVVRGSAVNQDGA-SNGLTAPHGPSQQRVIRRAL  
pikro\_004\_KS\_001.seq LAWGEGV AV L L LVERLSDARRKGH RVLAVVRGSAINQDGA-SNGLTAPNGPSQQHLIRQAL  
Stamb\_001\_KS\_002.seq TGWSEGAGM L VLRRLSDALADGQHVLA VLRGSAVNSDGA-SNGLTAPNGLAQRRVIRAAAL  
Stamb\_001\_KS\_003.seq TGWSEGAGV L L LVERLSDARRNGHDVLA VVRGSAVNQDGA-SNGLTAPNGPSQQRVIRAAAL  
Stamb\_001\_KS\_004.seq TGWEGAGV L L LVERLSDARAQGH RVLGLLRGSAVNQDGA-SNGLTAPNGPAQQRVIRAAAL  
Stamb\_002\_KS\_001.seq TGWEGGV L L LVERLSDAVRNGHEVLA VVRGSAVNQDGA-SNGLTAPNGPSQQRVIRDAL  
Stamb\_002\_KS\_002.seq TGWSEGV L L LVERLSDAVRRGHEVLA VVRGSAVNQDGA-SNGLTAPNGPSQERVIRQAL

Stamb\_003\_KS\_001.seq TGWSEGVGVLLVERLS DARRNGHDVLA VIRGS AVNQDGA-SNGLTAPNGFPSQQRVIRQAL  
 Stamb\_003\_KS\_002.seq TGWAEGVGVLLVERLS DAVRRGHEVLAVVIRGS AVNQDGA-SNGLTAPNGFPSQERVIRQAL  
 Stamb\_003\_KS\_003.seq TGWSEGVGMLLVERLS DARRNGHEVLA VVIRGS AVNQDGA-SNGLTAPNGFPSQERVIRQAL  
 Stamb\_003\_KS\_004.seq TGWSEGVGVLLVERLS DARRNGHEI LA VVIRGS AVNQDGA-SNGLTAPNGFPSQQRVIRQAL  
 Stamb\_003\_KS\_005.seq TGWSEGVGVLLVERLADARRNGHRVLA VVIRGS AVNQDGA-SNGLTAPNGFPSQQRVIRQAL  
 Stamb\_004\_KS\_001.seq TGWSEGVGVLLVERLS DAVRNGHEVLAVVIRGS AVNQDGA-SNGLTAPNGFPSQQRVILQAL  
 Stamb\_004\_KS\_002.seq TGWSEGVGMLLVERLS DARRNGHPVLA VVIRGS AVNQDGA-SNGLTAPNGFPSQERVIRAAL  
 Stamb\_004\_KS\_003.seq TGWSEGVGMILLVERLS DALRAGHPVLA LIRGTAVNQDGA-SNGLTAPSGRAQQQVIRQAL  
 Stamb\_005\_KS\_001.seq TGWSEGVGVLLVERLS DARRNGHRVLA VVIRGS AVNQDGA-SSGLTAPNGPAQQRVIRQAL  
 Stamb\_006\_KS\_001.seq TGWSEGVGVLLVERLS DARRNGHRVLA VVIRGS AVNSDGA-SNGLTAPNGPAQRRVILDAL  
 Stamb\_006\_KS\_002.seq TGWSEGVGVLLVERLS DARRNGHRVLA VVIRGS AINS DGA-SNGLTAPNGPAQRRVIRRAL  
 Stamb\_007\_KS\_001.seq TGWSEGAGVLLVERLS DARRRGDRVLA VIKGS AVNQDGA-SNGLSAPNGFPSQERVIRAAL  
 Stamb\_007\_KS\_002.seq TGWSEGVGMLLVERLS EARRNGHEVLAVVIRGS AVNSDGA-SNGLTAPNGFPSQQRVIRAAL  
 Stamb\_008\_KS\_001.seq TGWSEGVGVLLVERLS DARRNGHPVLA LIRGS AVNQDGA-SNGLTAPSGPAQERVIRAAL  
 Stamb\_008\_KS\_002.seq TGWAEGVGVLLVERLS DAVRNGHEVLAVVIRGS AVNQDGA-SNGLTAPNGFPSQERVIRAAL  
 Stamb\_009\_KS\_001.seq TGWAEGVGVLLVERLS DAVRNGHEVLAVVIRGS AVNQDGA-SSGLTAPNGFPSQERVIRAAL  
 Stamb\_009\_KS\_002.seq AGWSEGVGVLLVERLS DARRNGHEVLAVVIRGS AVNSDGA-SNGLTAPNGPAQQRVIRAAL  
 Stamb\_009\_KS\_003.seq TGWSEGVGMLLVERLS DARRNGHRVLA VVIRGS AVNQDGA-SNGLTAPNGFPSQERVIRAAL  
 Stamb\_009\_KS\_004.seq TGWSEGVGLVLLVERLS DARRNGHRVLA VVIRGS AINS DGA-SNGLTAPNGPAQRRVIRAAL

.:\* . \* : . : . \* \*\* . \* : \* . \*

mycol\_001\_KS\_001.seq ANAGLTHDQVDVAE AHGTGTTLGDPIEAGALHATYGHHTPDQPLWLGSIKSNIGHTQA-  
 mycol\_001\_KS\_002.seq ANAGLTHDQVDVAE AHGTGTTLGDPIEAGALHATYGHHTPDQPLWLGSIKSNIGHTQA-  
 mycol\_001\_KS\_003.seq ANAGLTHDQVDVAE AHGTGTTLGDPIEAGALHATYGHHTPDQPLWLGSIKSNIGHTQA-  
 mycol\_001\_KS\_004.seq ANAGLTHDQVDVAE AHGTGTTLGDPIEASALHATYGHHTPDQPLWLGSIKSNIGHTQA-  
 mycol\_001\_KS\_005.seq ANAGLTHDQVDVAE AHGTGTTLGDPIEAGALHATYGHHTPDQPLWLGSIKSNIGHTQA-  
 mycol\_001\_KS\_006.seq ANAGLTHDQVDVAE AHGTGTTLGDPIEASALHATYGHHTPDQPLWLGSIKSNIGHTQA-  
 mycol\_001\_KS\_007.seq ANAGLTHDQVDVAE AHGTGTTLGDPIEAGALHATYGHHTPDQPLWLGSIKSNIGHTQA-  
 mycol\_001\_KS\_008.seq ANAGLTHDQVDVAE AHGTGTTLGDPIEASALHATYGHHTPDQPLWLGSIKSNIGHTQA-  
 mycol\_002\_KS\_001.seq ANAGLTHDQVDVAE AHGTGTTLGDPIEASALHATYGHHTPDQPLWLGSIKSNIGHTQA-  
 mycol\_003\_KS\_001.seq ANAGLTHDQVDVAE AHGTGTTLGDPIEASALHATYGHHTPDQPLWLGSIKSNIGHTQA-  
 mycol\_003\_KS\_002.seq ANAGLTHDQVDVAE AHGTGTTLGDPIEASALHATYGHHTPDQPLWLGSIKSNIGHTQA-  
 mycol\_003\_KS\_003.seq ANAGLTHDQVDVAE AHGTGTTLGDPIEASALHATYGHHTPDQPLWLGSIKSNIGHTQA-  
 mycol\_003\_KS\_004.seq ANAGLTHDQVDVAE AHGTGTTLGDPIEASALHATYGHHTPDQPLWLGSIKSNIGHTQA-  
 mycol\_003\_KS\_005.seq ANAGLTHDQVDVAE AHGTGTTLGDPIEASALHATYGHHTPDQPLWLGSIKSNIGHTQA-  
 mycol\_003\_KS\_006.seq ANAGLTHDQVDVAE AHGTGTTLGDPIEASALHATYGHHTPDQPLWLGSIKSNIGHTQA-  
 mycol\_003\_KS\_007.seq ANAGLTHDQVDVAE AHGTGTTLGDPIEASALHATYGHHTPDQPLWLGSIKSNIGHTQA-  
 eryth\_001\_KS\_001.seq AESGLGPADIDVAE AHGTGTRLGDP IEARALFEAYGRDR--EQPLHLGSVKSNIIGHTQA-  
 eryth\_001\_KS\_002.seq ARAGITGADVAVE AHGTGTRLGDPVEASALLATYGKSRGSSGPVLLGSVKSNIIGHAQA-  
 eryth\_002\_KS\_001.seq ESCGLEPGDQVDVAE AHGTGTTLGDPIEANALLDITYGRDRDADRLPLWLGSIKSNIGHTQA-  
 eryth\_002\_KS\_002.seq AASGVPAADV DVAE AHGTGTELGDPIEAGALIATY GQDR--DRPLRLGSVKTNIIGHTQA-  
 eryth\_003\_KS\_001.seq ENAGVVRAGDQVDVAE AHGTGTRLGDP IEVHALLSTYGAERD PDDPLWIGSVKSNIIGHTQA-  
 eryth\_003\_KS\_002.seq ARAGITGADVAVE AHGTGTRLGDPVEASALLATYGKSRGSSGPVLLGSVKSNIIGHAQA-  
 amphi\_002\_KS\_001.seq ANAGLRPGDQVDVAE AHGTGTP LGDPIEAQALIATYGS DRDPQQPLLLGSVKSNIIGHTQS-  
 amphi\_002\_KS\_002.seq ANAGLGTADIDVVE AHGTGTKLGDPIEAGALLATY GQGRDGGQPLLLGSVKSNIIGHTQA-  
 amphi\_003\_KS\_001.seq AHAGLQASDQVDVAE AHGTGTP LGDPIEAQALLATY GQNR--ERPLLLGSVKSNIIGHAQA-  
 amphi\_003\_KS\_002.seq ASGGLSPEDQVDVVE AHGTGTTLGDPIEAQALIATYGRDRDPERPLWLGSVKSNIIGHTQA-  
 amphi\_003\_KS\_003.seq ASGGLSTGDQVDVAE AHGTGTTLGDPIEAQALIATY GQNRDDEQPLWLGSVKSNIIGHTQA-  
 amphi\_003\_KS\_004.seq ASGGLSTGDQVDVAE AHGTGTTLGDPIEAQALLATY GQNRDPEDRPLLLGSVKSNIIGHTQA-  
 amphi\_003\_KS\_005.seq ASGGLSAQEI DVAE AHGTGTTLGDPIEAQALLATYGRDRDPEQPLWLGSVKSNIIGHTQA-  
 amphi\_003\_KS\_006.seq ASGGLSTGDQVDVVE AHGTGTTLGDPIEAQALLATYGRDRDPEQPLLLGSVKSNIIGHTQA-  
 amphi\_004\_KS\_001.seq VNRALSAGDIDVVE AHGTGTTLGDPIEAQALLATY GQQRDEDKPLLLGSVKSNIIGHTQA-  
 amphi\_004\_KS\_002.seq ASGGLSAGDQVDVVE AHGTGTTLGDPIEAQALLATYGRDRDPEQPLLLGSVKSNIIGHTQA-  
 amphi\_004\_KS\_003.seq ANARVAPGEID LLEAHGTGTP LGDPIEAQALFATYGRTRTPETALLLGSVKSNIIGHTQS-  
 amphi\_004\_KS\_004.seq ANAGVEANDIDVLEHGHTGTALGDPIEAQALFATYGKDRDPERPVLVLSVKSNIIGHTQM-  
 amphi\_004\_KS\_005.seq ADARLAPSEIDVAE AHGTGTTLGDPIEAQALLNTY GQGRDQDQPLLLGSVKSNIIGHTQA-  
 amphi\_004\_KS\_006.seq ANARLEADQVDVAE AHGTGTKLGDPIEAQALLATY GQDR--ERPVLVLSKANIGHTQA-  
 amphi\_005\_KS\_001.seq SNAGLNPADQVDVVE AHGTGTP LGDPIEAQSILATY GQDR--EQPLLLGSVKSNIIGHTQSA-  
 amphi\_005\_KS\_002.seq ANAGLRPGDQVDVAE AHGTGTP PGPDPIEAQALLATYGS DRDPQQPLLLGSVKSNIIGHTQA-  
 amphi\_005\_KS\_003.seq ANAGLRPGDQVDVAE AHGTGTP LGDPIEAQALIATYGS DRDPQQPLLLGSVKSNIIGHTQS-  
 amphi\_006\_KS\_001.seq ASAGLSPADQVDVAE AHGTGTTLGDPIEAQALLATY GQDRDASRPLRLGTVKSNIIGHTQA-  
 averm\_001\_KS\_001.seq ANAGLSVADQVDVVEGHGTGTTLGDPIEAQALLATY GQR--AGDRPLWLGSVKSNIIGHTMA-  
 averm\_001\_KS\_002.seq ANAGLSAGDQVDVAE AHGTGTTLGDPIEAQALLATY GQDRAGEPLWLGSVKSNIIGHTQA-  
 averm\_002\_KS\_001.seq ANAHLSPADQVDVAE AHGTGTTLGDPIEAQALVEAYGQDRPNGRPLWLGLTKSNIGHTSMA-  
 averm\_002\_KS\_002.seq ANADLTPADQVDVAE AHGTGTTLGDPIEAQALLATY GQDRPGNEPLWLGSVKSNIIGHTQA-  
 averm\_002\_KS\_003.seq ANADLTPADQVDVAE AHGTGTTLGDPIEAQALFATY GQDRPGNGPLWLGSVKSNIIGHTQA-  
 averm\_002\_KS\_004.seq ANAGLTPADQVDVAE GHGTGTTLGDPIEAQALLAAYGQHRPHRPLWLGSVKSNIIGHTQA-  
 averm\_003\_KS\_001.seq ANAGLSVADQVDVVEGHGTGTTLGDPIEAQALLATY GQR--AGNRPLWLGSVKSNIIGHTQA-  
 averm\_003\_KS\_002.seq ANAGLSAGDQVDVAE AHGTGTTLGDPIEAQALLATY GQDRAGEPLWLGSVKSNIIGHTQA-  
 averm\_003\_KS\_003.seq ANAGLTPADQVDVAE GHGTGTTLGDPIEAQALLAAYGQHRPHRPLWLGSVKSNIIGHTQA-  
 averm\_004\_KS\_001.seq ACAGLSVADQVDVVEGHGTGTTLGDPIEAQALLATY GQ--RAGDTPVWLGSVKSNIIGHTQA-  
 averm\_004\_KS\_002.seq ACAGLSVADQVDVVEGHGTGTTLGDPIEAQALLATY GQGRSGERPVWLGSVKSNIIGHTQA-  
 averm\_004\_KS\_003.seq ACAGLSVADQVDVVEGHGTGTTLGDPIEAQALLATY GQGRSGERPVWLGSVKSNIIGHTQA-  
 borre\_002\_KS\_001.seq ASAGLGPADQVDVVE AHGTGTRLGDP IEAQALLATYGRGRDAERPLWLGSVKSNIIGHTQA-  
 borre\_003\_KS\_001.seq ASARLAPEDQVDVAE AHGTGTP LGDPIEAQALLATYGRGRDAERPLWLGSVKSNIIGHTQA-  
 borre\_003\_KS\_002.seq ASAGLGPADQVDVVE AHGTGTRLGDP IEAQALLATYGRGRDADRLPLWLGSVKSNIIGHTQA-  
 borre\_004\_KS\_001.seq ADGRLTPADQVDVVEGHGTGTRLGDP IEAQALLATYGRGRDADRLPLWLGSVKSNIIGHTQA-



borre\_005\_KS\_001.seq TVGRLAPSDIDVVEAHGTGTALGDP IEAQALLATYGRGRDADRPLWLGSVKSNIIGHTQA-  
borre\_006\_KS\_001.seq ANARLAPEDVDVEHGHGTGTSLGDP IEAQALLATYGRGRDAERPLWLGSVKSNIIGHAQA-  
epoth\_002\_KS\_001.seq ALAGVEARSIQY IETHGTTLLGDAIETAALRRVFDRASTRRSCAIGSVKTIIGHLES-  
epoth\_003\_KS\_001.seq RSAHVEAGAVDYVETHGTGTSLGDP IEVEALRATVGPARS DGTRCVLGAVKTNIGHLEA-  
epoth\_003\_KS\_002.seq AHAGVVPADVDFVECHGTGTALGDP IEVRALS DVYGGQARPADRPLILGAAKANLGHMEP-  
epoth\_003\_KS\_003.seq SQAGVSPVDVDFVECHGTGTALGDP IEVQALSEVYGPGRSEDRPLVLGAVKANVAHLEA-  
epoth\_003\_KS\_004.seq EQAGLAPADVSVYVECHGTGTLLGDP IEVQALGAVLAQGRPSDRPLVLGSVKSNIIGHTQA-  
epoth\_004\_KS\_001.seq RNAGVEAEAI GYIETHGAATSLGDP IEIEALRTVVGPARADGARCVLGAVKTNLGHLEG-  
epoth\_004\_KS\_002.seq AQAGVPAEVDVFECHGTGTALGDP IEVQALGAVYGRGRPAERPLWLGAVKANLGHLEA-  
epoth\_005\_KS\_001.seq QSARVDGAIIDYVETHGTGTSLGDP IEVDALRAVMGPARADGSRVCLGAVKTNLGHLEG-  
lasal\_001\_KS\_002.seq ADARLSGADVVDVVEAHGTGTLLGDP IEADALLATYQDRPADRPLWLGSVKSNIIGHTQC-  
lasal\_001\_KS\_003.seq ANARLTPEVDVAE AHGTGTRLGDP IEAQALLATYQGERAEDRPLWLGSVKSNIIGHAQA-  
lasal\_002\_KS\_001.seq ANARLAPADVDVAE AHGTGTALGDP IEAQALLATYQDRPTEQPLWLGSIKSNIIGHTQA-  
lasal\_002\_KS\_002.seq ANARLTPADVDVAE AHGTGTLLGDP IEADALLATYQDRPEDRPLWLGSVKSNIIGHTQA-  
lasal\_002\_KS\_003.seq ANARLTPADVDVAE AHGTGTALGDP IEAQALLATYQDRPTEQPLWLGSIKSNIIGHTQA-  
lasal\_003\_KS\_001.seq RNARLSPQVDVAE AHGTGTLLGDP IEAQALLATYQDRPEDRPLWLGSVKSNIIGHTSA-  
lasal\_004\_KS\_001.seq DNAGLTASDVDAE AHGTGTLLGDP IEAQALLAAYGHERPAHRPLRVGLSLSKNIGHAGP-  
lasal\_005\_KS\_001.seq ANARLSGADVVDVAE AHGTGTLLGDP IEAQALLATYQGERADGRPLWLGSVKSNIIGHTQA-  
lasal\_005\_KS\_002.seq ANARLTPADVDVAE AHGTGTLLGDP IEAQALLATYQNRTEQPLWLGSVKSNIIGHTQC-  
lasal\_006\_KS\_001.seq TNARLTPGDI DMVEAHGTGTLLGDP IEAQALLATYQDRPADRPLWLGSVKSNIIGHTQA-  
lasal\_007\_KS\_001.seq ANARLTPADVDVAE AHGTGTLLGDP IEAQALLATYQNRTEQPLWLGSVKSNIIGHTQA-  
rapam\_001\_KS\_001.seq SNAGLAPHEVDVVEAHGTGTLLGDP IEAQAVIATYGGDRE--QPVLGSLKSNIIGHAQA-  
rapam\_001\_KS\_002.seq SNAGLSTAEVDVVEAHGTGTLLGDP IEAQALMATYGGDRE--QPLLLGSVKSNIIGHTQA-  
rapam\_001\_KS\_003.seq SNAGLAAHEVDVVEAHGTGTLLGDP IEAQAVIATYGGDRE--RPLLLGSLSKNIGHAQA-  
rapam\_001\_KS\_004.seq SNAGLSTADVDVVEAHGTGTLLGDP IEAQALLATYGGDRE--QPLLLGSLSKNIGHTQA-  
rapam\_002\_KS\_001.seq SNAGLSTAEVDVVEAHGTGTLLGDP IEAQALLATYGGDRE--QPLLLGSVKSNIIGHTQA-  
rapam\_002\_KS\_002.seq ANAGLTTAEVDVVEAHGTGTLLGDP IEAQAVIATYGGDRE--RPLLLGSLSKNIGHAQA-  
rapam\_002\_KS\_003.seq ANAGLTTAEVDVVEAHGTGTLLGDP IEAQAVIATYGGDRE--QPLLLGTLKSNVGHGTQA-  
rapam\_002\_KS\_004.seq SNAGLAAHEVDVVEAHGTGTLLGDP IEAQALLATYGGDRE--QPLLLGSVKSNIIGHTQA-  
rapam\_002\_KS\_005.seq ANAGLTTAEVDVVEAHGTGTLLGDP IEAQAVIATYGGDRD--QPVLGSLKSNVGHGTQA-  
rapam\_002\_KS\_006.seq SNAGLAPHEVDVVEAHGTGTLLGDP IEAQAVIATYGGGRG--EPLLLGSLSKNVGHGTQA-  
rapam\_003\_KS\_001.seq SNAGLTTAEVDVVEHGHGTGTLLGDP IEAQAVIATYGGDRE--QPLLLGSLSKNIGHTQA-  
rapam\_003\_KS\_002.seq SNAGLSTAEVDVVEAHGTGTLLGDP IEAQALIATYGGDRD--QPVLGSLKSNIGHTQA-  
rapam\_003\_KS\_003.seq SNAGLAAHEVDVVEAHGTGTLLGDP IEAQALIATYGGDRE--RPLLLGSLSKNIGHAQA-  
rapam\_003\_KS\_004.seq ANAGLTASDVVDVVEAHGTGTLLGDP IEAEAILATYGGQER--SAPAWLSLSKNIGHAMA-  
nysta\_002\_KS\_001.seq ARTGLTPADIDVAE AHGTGTLLGDP IEAQALLATYGGHTPDQPLWLGSLSKNIGHTQA-  
nysta\_002\_KS\_002.seq ANAGLTGADVDAE AHGTGTLLGDP IEAQALLATYGGDRDAERPLLLGSVKSNIIGHTQA-  
nysta\_003\_KS\_001.seq DSAHLTAADIDVAE AHGTGTLLGDP IEAQALLATYGGDR--PREPLWLGSVKSNIIGHTQA-  
nysta\_003\_KS\_002.seq ASGGLSTADVDVAE AHGTGTLLGDP IEAQALLATYGRDRDPENPLLLGSIKSNIIGHTQA-  
nysta\_003\_KS\_003.seq ASGGLSTADVDVAE AHGTGTLLGDP IEAQALLATYGRDRDPENPLWLGSLSKNIGHTQA-  
nysta\_003\_KS\_004.seq ASGGLSTADVDVAE AHGTGTLLGDP IEAQALLATYGRDRDPENPLLLGSIKSNIIGHTQA-  
nysta\_003\_KS\_005.seq ASGGLTAGDVVDVVEAHGTGTLLGDP IEAQALLATYGRDREPERPLLLGSVKSNIIGHTQA-  
nysta\_003\_KS\_006.seq ASGGLSTADVDVAE AHGTGTLLGDP IEAQALLATYGRDRDPENPLLLGSIKSNIIGHTQA-  
nysta\_004\_KS\_001.seq VVARLAAGDIDVVEAHGTGTLLGDP IEAQALLATYGGNRPRPLWLGSVKSNIIGHTQA-  
nysta\_004\_KS\_002.seq ASGGLTAGDVVDVVEAHGTGTLLGDP IEAQALLATYGRDREPERPLLLGSVKSNIIGHTQA-  
nysta\_004\_KS\_003.seq ANARLAPGDI DALEAHGTGTPLGDP IEAQALFATYGRDRDPESALLGSVKSNIIGHTQS-  
nysta\_004\_KS\_004.seq ANSAVAPGDI DVLEHGHGTGTALGDP IEAQALLATYGGDRAPERPLLLGSVKSNIIGHTQM-  
nysta\_004\_KS\_005.seq ADARLRPADIDVAE AHGTGTLLGDP IEARALITAYGRDRDAERPLLLGSVKSNIIGHTQA-  
nysta\_004\_KS\_006.seq ANARLRPADIDVAE AHGTGTRLGDP IEAQALLATYGGDR--ERPVLGSLKSNIGHTQA-  
nysta\_005\_KS\_001.seq ANAGLATGDI DAVEAHGTGTPLGDP IEAQSIATYGGDR--AHPVLGSLKSNIGHTQA-  
nysta\_005\_KS\_002.seq ANAGLTPVDVDAE AHGTGTPLGDP IEAQALIAAYGTRDPEHPPLLLGSVKSNIIGHTQS-  
nysta\_005\_KS\_003.seq ANAGLAPGDVDAE AHGTGTLLGDP IEAQALLATYGGDRPADRPLWLGSVKSNIIGHTQA-  
nysta\_006\_KS\_001.seq AGAGLVPGDVDAE AHGTGTRLGDP IEAGALLATYGGDRPADRPLWLGSVKSNIIGHTQA-  
spino\_002\_KS\_001.seq ASAGLSVSDVDVAE AHGTGTRLGDP IEAQALIATYGRDRDPGRPLWLGSVKSNIIGHTQA-  
spino\_003\_KS\_001.seq TSAGLSASDVDAE AHGTGTRLGDP IEAQALIAAYGGDRDRDRPLWLGSVKSNIIGHTQA-  
spino\_003\_KS\_002.seq ANAALSASDVDAE AHGTGTRLGDP IEAQALIATYGGARERDRPLWLGSVKSNIIGHTQA-  
spino\_004\_KS\_001.seq ASAGLSVSDVDVAE AHGTGTLLGDP IEAQALIATYGGGREKDRPLWLGSVKSNIIGHTQA-  
spino\_004\_KS\_002.seq TSAGLSVSDVDVAE AHGTGTRLGDP IEAQALIATYGRDRDPGRPLWLGSVKSNIIGHTQA-  
spino\_004\_KS\_003.seq ANAGLSASDVVDVVEAHGTGTLLGDP IEAQALIATYGGQERPERALWLGSIKSNIIGHTQA-  
spino\_005\_KS\_001.seq ANAGLSPAEDVVDVVEAHGTGTALGDP IEAQALIATYGANRSADHPPLLLGSLSKNIGHTQA-  
spino\_005\_KS\_002.seq ASAGLSVSDVDVAE AHGTGTRLGDP IEAQALIATYGGGRSDRPLWLGSVKSNIIGHTQA-  
spino\_005\_KS\_003.seq ASAGLSVSDVDVAE AHGTGTRLGDP IEAQALIATYGRDRDPGRPLWLGSVKSNIIGHTQA-  
tylac\_001\_KS\_002.seq GNARLTVADVVDVVEAHGTGTRLGDP IEAQALLGTYGRDRDGGRPVWLGSLSKNIGHAQA-  
tylac\_001\_KS\_003.seq ANARLTVADVVDVVEAHGTGTRLGDP IEAQALLGTYGRDRDAECPVWLGSLSKNIGHAQA-  
tylac\_002\_KS\_001.seq RDAGVGPQVDVAE AHGTGTTELGDP IEAGALLATYGTARTAERPLWLGSLSKNIGHTQA-  
tylac\_003\_KS\_001.seq ANARLTVADVVDVVEAHGTGTRLGDP IEAQALLGTYGRDRDGGRPVWLGSLSKNIGHAQA-  
tylac\_003\_KS\_002.seq ADAGLRPEDI DAVEAHGTGTTELGDP IEAEALLATYGRTRTADRPLWLGSLSKNIGHTQA-  
tylac\_004\_KS\_001.seq GNARLTVADVVDVVEAHGTGTRLGDP IEAQALLGTYGRDRDGGRPVWLGSLSKNIGHAQA-  
tylac\_005\_KS\_001.seq ADAGLSPEDVDAE AHGTGTRLGDP IEAGALLAASGRNRSGDHPWLWLGSLSKNIGHAQA-  
nidda\_001\_KS\_002.seq SDAGLSADDIDVAE AHGTGTALGDP IEAGALLATYGHPK--RQTPVWLGSLSKNIGHTQA-  
nidda\_001\_KS\_003.seq SDAGLSADDIDVAE AHGTGTPLGDP IEAEALLATYGHPE--RQTPVWLGSLSKNIGHAQA-  
nidda\_002\_KS\_001.seq SDAGLSADDIDVAE AHGTGTPLGDP IEAGALLATYGHPE--RQTPVWLGSLSKNIGHTQA-  
nidda\_003\_KS\_001.seq ADAHLTPDDIDVAE AHGTGTPLGDP IEAGALLATYGHPK--RQTPVWLGSLSKNIGHTQA-  
nidda\_003\_KS\_002.seq ADAGLTAADIDVAE AHGTGTHLGDPIEAGALLATYGGQAE--DRGPLWLGSLSKNIGHTQA-  
nidda\_004\_KS\_001.seq ADAGLRADDIDVAE AHGTGTPLGDP IEAGALLATYGHPE--RRKPLWLGSLSKNIGHTQA-  
nidda\_005\_KS\_001.seq ADAHLTPDDIDVAE AHGTGTPLGDP IEAGALLATYGHPE--RQTPVWLGSLSKNIGHTQA-  
monen\_001\_KS\_002.seq AAARLTAEDVDVVEAHGTGTLLGDP IEAQALLATYGGQSAERPLWLGSVKSNIIGHTQA-

monen\_002\_KS\_001.seq  
monen\_003\_KS\_001.seq  
monen\_003\_KS\_002.seq  
monen\_004\_KS\_001.seq  
monen\_004\_KS\_002.seq  
monen\_005\_KS\_001.seq  
monen\_005\_KS\_002.seq  
monen\_006\_KS\_001.seq  
monen\_007\_KS\_001.seq  
monen\_008\_KS\_001.seq  
monen\_008\_KS\_002.seq  
oligo\_001\_KS\_002.seq  
oligo\_001\_KS\_003.seq  
oligo\_001\_KS\_004.seq  
oligo\_002\_KS\_001.seq  
oligo\_002\_KS\_002.seq  
oligo\_003\_KS\_001.seq  
oligo\_003\_KS\_002.seq  
oligo\_004\_KS\_001.seq  
oligo\_004\_KS\_002.seq  
oligo\_005\_KS\_001.seq  
oligo\_006\_KS\_001.seq  
oligo\_006\_KS\_002.seq  
oligo\_006\_KS\_003.seq  
oligo\_007\_KS\_001.seq  
oligo\_007\_KS\_002.seq  
rifam\_001\_KS\_001.seq  
rifam\_001\_KS\_002.seq  
rifam\_001\_KS\_003.seq  
rifam\_002\_KS\_001.seq  
rifam\_002\_KS\_002.seq  
rifam\_002\_KS\_003.seq  
rifam\_003\_KS\_001.seq  
rifam\_004\_KS\_001.seq  
rifam\_005\_KS\_001.seq  
rifam\_005\_KS\_002.seq  
pikro\_001\_KS\_002.seq  
pikro\_001\_KS\_003.seq  
pikro\_002\_KS\_001.seq  
pikro\_002\_KS\_002.seq  
pikro\_003\_KS\_001.seq  
pikro\_004\_KS\_001.seq  
Stamb\_001\_KS\_002.seq  
Stamb\_001\_KS\_003.seq  
Stamb\_001\_KS\_004.seq  
Stamb\_002\_KS\_001.seq  
Stamb\_002\_KS\_002.seq  
Stamb\_003\_KS\_001.seq  
Stamb\_003\_KS\_002.seq  
Stamb\_003\_KS\_003.seq  
Stamb\_003\_KS\_004.seq  
Stamb\_003\_KS\_005.seq  
Stamb\_004\_KS\_001.seq  
Stamb\_004\_KS\_002.seq  
Stamb\_004\_KS\_003.seq  
Stamb\_005\_KS\_001.seq  
Stamb\_006\_KS\_001.seq  
Stamb\_006\_KS\_002.seq  
Stamb\_007\_KS\_001.seq  
Stamb\_007\_KS\_002.seq  
Stamb\_008\_KS\_001.seq  
Stamb\_008\_KS\_002.seq  
Stamb\_009\_KS\_001.seq  
Stamb\_009\_KS\_002.seq  
Stamb\_009\_KS\_003.seq  
Stamb\_009\_KS\_004.seq

DNARLTPSEVDVAEAGHTGTRKLGDP IEAGALLATYQGHR--ARPLLLGSLKSNIGHTHA-  
AGARLSPAEDVDAEAGHTGTRKLGDP IEADALLATYGQERHGGRLPLWLSVKSNIIGHTQA-  
AGAGRPEDIDVVEAGHTGTRKLGDP IEAQALLATYGGQRPEDRPLWLSVKSNIIGHTQA-  
ANAGLGAAEVDVAEAGHTGTRKLGDP IEAGALLATYGRDRDEDRPLWLSVKSNIIGHTQA-  
ASGGLSSVDVVDVEAGHTGTRKLGDP IEAQALLATYGGQRPEDRPLWLSVKSNIIGHTQA-  
SSAHLSTSEIDVVEAGHTGTRKLGDP IEAEAL IATYGKEREDDRPLWLSVKSNIIGHTQA-  
ASGGLSSVDVVDVEAGHTGTRKLGDP IEAQALLATYGGQRPVDRPLWLSVKSNIIGHTQA-  
TNARVTPDAVDVAEAGHTGTRKLGDP IEGNALLATYGKDRPADRPLWLSVKSNIIGHTQA-  
ANARLAPEDIDVAEAGHTGTRKLGDP IEAGALI SAYGRERPEDRPLWVGAVKSNIIGHTQI-  
ANARLSAEDIDVAEAGHTGTRKLGDP IEAQALI IATYGGQRPEDRPLWLSVKSNIIGHTQA-  
ANARLSAEDVDAEAGHTGTRKLGDP IEASALVATYGKERPADRPLWLSVKSNIIGHTQA-  
ASAGLSAADVDMVEAGHTGTRKLGDP IEAQALLATYGGQRPDDRPLWLSVKSNIIGHTQA-  
ADAGCVPSDVAEAGHTGTRKLGDP IEAQALLATYGRDRPADRPLWLSVKSNIIGHTQA-  
ASAGLSAADVDMVEAGHTGTRKLGDP IEAQALLATYGGQRPADRPLWLSVKSNIIGHTQA-  
ADAQLSVGQVDAEAGHTGTRKLGDP IEAGALLATYGGQDRAGDEPLWLSVKSNIIGHTQA-  
AAAGLSADDVDAEAGHTGTRKLGDP IEAQAVL IATYGRDRPAGQPLWLSVKSNIIGHTQA-  
ANAGVSPAEDVDAEAGHTGTRKLGDP IEADALLATYGQAKTAGRPLWLSVKSNIIGHTQA-  
ERSGLTAPDVAEAGHTGTRKLGDP IEAQAI IATYGRDRTEDRPLWLSVKSNIIGHTQA-  
ASARLGVADVDMVEAGHTGTRKLGDP IEAQALLATYGRERSAEQPLWLSVKSNIIGHTQA-  
ANARLGGADVDMVEAGHTGTRKLGDP IEAQALLATYGRERSAEQPLWLSVKSNIIGHTQA-  
DDAGLATADIDVVEAGHTGTRKLGDP IEARALLATYGGQDRPADRPLWLSVKSNIIGHTQY-  
ANAGLSAADVDMVEAGHTGTRKLGDP IEAEALLATYGGQRPADRPLWLSVKSNIIGHTQA-  
ANAGLSAADVDMVEAGHTGTRKLGDP IEAQALLATYGGQRPADRPLWLSVKSNIIGHTQA-  
ANAGLALADVDMVEAGHTGTRKLGDP IEAQALLATYGGQRPADRPLWLSVKSNIIGHTQA-  
ANAGLALADVDMVEAGHTGTRKLGDP IEAQALLATYGGQDRHDGRPLWLSVKSNIIGHTQA-  
ASAGLSAADVDMVEAGHTGTRKLGDP IEAQALLATYGGQRPADRPLWLSVKSNIIGHTQY-  
AAAGLAPSDVDVVEAGHTGTRKLGDP IEAQALLATYGGQER--KQPLWLSVKSNIIGHTQA-  
AAAGLSTSDVDAEAGHTGTRKLGDP IEAEALLATYGGQNR--TPLWLSVKSNIIGHTQA-  
ASAGLAPSDVDVVEAGHTGTRKLGDP IEVQALLATYGGQER--EQPLWLSVKSNIIGHTQA-  
ASAGLTPSDVDVVEAGHTGTRKLGDP IEVQALLATYGGQDRPQQLWLSVKSNIIGHTQA-  
AGAGLQPSVDVVEAGHTGTRKLGDP IEAQALLATYGGQER--ETPLWLSVKSNIIGHTQA-  
VSAGLAPSDVDVVEAGHTGTRKLGDP IEAQALLATYGGQDR--ESPLWLSVKSNIIGHTQA-  
ANAGIGPSDVDVVEAGHTGTRKLGDP IEAQALLATYGGQDR--ETPLWLSVKSNIIGHTQA-  
AEAGLSPSDVDVVEAGHTGTRKLGDP IEAQALLATYGGQDRPEKPLWLSVKSNIIGHTQA-  
AGAGLVASDVDVVEAGHTGTRKLGDP IEAQALLATYGGQER--ERPLWLSVKSNIIGHTQA-  
AGAGLEPSDVDVVEAGHTGTRKLGDP IEAQALLATYGGQDRPETPLWLSVKSNIIGHTQA-  
ADARLTTSDVDVVEAGHTGTRKLGDP IEAQALI IATYGGQDRDEQPLRGLSLSKNIIGHTQA-  
ADARLAPGDIDVVEAGHTGTRKLGDP IEAQGLQ IATYGGQDRPAERPLAIGSVKSNIIGHTQA-  
ADARLTTSDVDVVEAGHTGTRKLGDP IEAQAVI IATYGGQDRDGEQPLRGLSLSKNIIGHTQA-  
ADARLTTADVDVVEAGHTGTRKLGDP IEAQALI IATYGGQDRDEQPLRGLSLSKNIIGHTQA-  
ADARLAPGDVDVVEAGHTGTRKLGDP IEAQALI IATYGGQESSEQPLRGLSLSKNIIGHTQA-  
ADARLTTSDVDVVEAGHTGTRKLGDP IEAQALLATYGGQDRAPGQPLRGLSLSKNIIGHTQA-  
DAAGLRPSDVDVVEAGHTGTRKLGDP IEAQALLATYGGQERDAERPLWLSVKSNIIGHTQA-  
ADAGLAPGDVDVVEAGHTGTRKLGDP IEAEALLATYGGQVRAERPLWLSVKSNIIGHTQA-  
NSAGLWPSEVDVAEAGHTGTRKLGDP IEAEALLATYGGQDRS--EPLYLGSVKSNIIGHTQA-  
ASAGLAPSDVDVVEAGHTGTRKLGDP IEAQALLATYGGQDRRAAGHPLWLSVKSNIIGHTQA-  
ANARLEASDVDVVEAGHTGTRKLGDP IEAQALLATYGGQDRHEDRPLWLSVKSNIIGHTQA-  
ANAQLTTVDVDAEAGHTGTRKLGDP IEALQ IATYGGQDRDDEDRPLWLSVKSNIIGHTQA-  
ANARLEASDVDVVEAGHTGTRKLGDP IEAQALLATYGGQDRDEDRPLWLSVKSNIIGHTQA-  
ANARLAASEVDVAEAGHTGTRKLGDP IEAQALLATYGGQDRDEDRPLWLSVKSNIIGHTQA-  
ATAGLAPGEVDVVEAGHTGTRKLGDP IEAQALLATYGGQDRDEDRPLWLSVKSNIIGHTQA-  
ADARLSPSEVDVAEAGHTGTRKLGDP IEAQALLATYGGQDRDADRPLWLSVKSNIIGHTQA-  
ADARLSASDVDVVEAGHTGTRKLGDP IEAQALLATYGGQDRPEGRPLWLSVKSNIIGHTQA-  
ADAGLDTADVDVVEAGHTGTRKLGDP IEVQALM IATYGGQDRDEEQPLWLSVKSNIIGHTQA-  
ANSGLDAADIDVVEAGHTGTRKLGDP IEAQSI IATYGGQDRRAEGRPLWLSVKSNIIGHTQA-  
ASALVPAEVDVAEAGHTGTRKLGDP IEAQALLATYGGQER--EPLYLGSVKSNIIGHTQA-  
AAARLSAAEIDVAEAGHTGTRKLGDP IEAHALLATYGGQER--QPLYLGSVKSNIIGHTQA-  
ADADLRHSDVDVVEAGHTGTRKLGDP IEAQALLATYGGQER--EPLYLGSVKSNIIGHTQA-  
ENARLAAADIDVVEAGHTGTRKLGDP IEAQALLATYGGQDRPADRPLWLSVKSNIIGHTQA-  
ATAGLAPHEVDVVEAGHTGTRKLGDP IEAQALLATYGGQERDPERPLWLSVKSNIIGHTQA-  
DDARLTPDQVDVVEAGHTGTRKLGDP IEAQALLATYGGQDR--DRPLWLSVKSNIIGHTQA-  
AAARLTAADIDVVEAGHTGTRKLGDP IEAQALLATYGGQDRPADRPLWLSVKSNIIGHTQA-  
AAARLTAADIDVVEAGHTGTRKLGDP IEAQALLATYGGQDRPADRPLWLSVKSNIIGHTQA-  
ASAGLEATDVDVVEAGHTGTRKLGDP IEAEALLATYGGQDRS--EPLYLGSVKSNIIGHTQA-  
ADARLTAAEVDVAEAGHTGTRKLGDP IEAQALLATYGGQER--EPLYLGSVKSNIIGHTQA-  
AAAGLEAAEVDVAEAGHTGTRKLGDP IEAQALLATYGGQDR--EPLYLGSVKSNIIGHTQA-

: :\* \*\*:\* \*\* :\* .: . :\*: \*: ..\*

mycol\_001\_KS\_001.seq  
mycol\_001\_KS\_002.seq  
mycol\_001\_KS\_003.seq  
mycol\_001\_KS\_004.seq  
mycol\_001\_KS\_005.seq  
mycol\_001\_KS\_006.seq  
mycol\_001\_KS\_007.seq  
mycol\_001\_KS\_008.seq  
mycol\_002\_KS\_001.seq

AAGAAGVVKMIQAI THATLPAT-LHVDQPSPHIDWSSGTVRLLTEPIQW-PNTD---HPR  
AAGAAGVVKMIQAI THATLPAT-LHVDQPSPHIDWSSGTVRLLTEPIQW-PNTD---HPR

mycol\_003\_KS\_001.seq AAGAAGVVKMIQAI THATLPAT-LHVDQPSPHIDWSSGTVRLLTEPIQW-PNTD---HPR  
mycol\_003\_KS\_002.seq AAGAAGVVKMIQAI THATLPAT-LHVDQPSPHIDWSSGTVRLLTEPIQW-PNTD---HPR  
mycol\_003\_KS\_003.seq AAGAAGVVKMIQAI THATLPAT-LHVDQPSPHIDWSSGTVRLLTEPIQW-PNTD---HPR  
mycol\_003\_KS\_004.seq AAGAAGVVKMIQAI THATLPAT-LHVDQPSPHIDWSSGTVRLLTEPIQW-PNTD---HPR  
mycol\_003\_KS\_005.seq AAGAAGVVKMIQAI THATLPAT-LHVDQPSPHIDWSSGTVRLLTEPIQW-PNTD---HPR  
mycol\_003\_KS\_006.seq AAGAAGVVKMIQAI THATLPAT-LHVDQPSPHIDWSSGTVRLLTEPIQW-PNTD---HPR  
mycol\_003\_KS\_007.seq AAGAAGVVKMIQAI THATLPAT-LHVDQPSPHIDWSSGTVRLLTEPIQW-PNTD---HPR  
eryth\_001\_KS\_001.seq AAGVAGVIK MVLAMRAGTLPRT-LHASERSKEIDWSSGAI SLLLEDEPEPW-PAG---ARPR  
eryth\_001\_KS\_002.seq AAGVAGVIK VLLGLERGVVPPM-LCRGERSGLIDWSSGIEIADGVREWSPAAD---GVR  
eryth\_002\_KS\_001.seq AAGVTGLLKVV LALRNGELPAT-LHVEEPTPHVDWSSGGVALLAGNQPW-RRG---ERTR  
eryth\_002\_KS\_002.seq AAGAAGVIK VVLMRHRGVLPRS-LHADELSPHIDWESGAVEVLRREVPW-PAGE---RPR  
eryth\_003\_KS\_001.seq AAGVAGVMKAVLALRHGEMPRT-LHFDEPSPQIEWDLGAVSVVQARSW-PAG---ERPR  
eryth\_003\_KS\_002.seq AAGVAGVIK VVGLNRLGLVPPM-LCRGERSPLIEWSSGGVELAEAVSPWPPAAD---GVR  
ampho\_002\_KS\_001.seq AAGVAGLVKMMVMAMHNGTLPRT-LHLETPSTHVDWVSLGAVRLLTEETAW-PETG---RVR  
ampho\_002\_KS\_002.seq AAGVAGVIK MVMAMHAGELPQT-LHIDEPSHVDWTSAGAVTLRRETEW-PAVG-D-RPR  
ampho\_003\_KS\_001.seq ASGAAGVIK MIMAIQHGVLP RS-LHAERPTSNVDWTAGAVELLDRADW-PET---GRAR  
ampho\_003\_KS\_002.seq AAGVAGVIK MIMSMRHRGVL PQT-LHVDAPSSHVDWDAGAVELLTEQTEW-PEN---DRVR  
ampho\_003\_KS\_003.seq AAGVAGVIK MVMMSMRHRGVL PCT-LHVDAPSSHVDWTEGAVELLTEQTEW-PET---DRVR  
ampho\_003\_KS\_004.seq AAGAAGVIK MVMAMQHGVLP RS-LNISEPSSHVDWSAGAVELLTEQTEW-PET---DRVR  
ampho\_003\_KS\_005.seq AAGVAGVIK MVMMSMRHRGVL PRT-LHVDAPSSHVDWTEGAVELLTEQTEW-PET---EHVR  
ampho\_003\_KS\_006.seq AAGVAGVIK MVMMSMRHRGVL PRT-LHVDAPSSHVDWTEGAVELLTEQTEW-PET---EHVR  
ampho\_004\_KS\_001.seq AAGVAGVIK MVMAMRHRGVL PRT-LLADEPTRHVDWVSGAVRVLTEWTEW-PATG---APR  
ampho\_004\_KS\_002.seq AAGVAGVIK MVMMSMRHRGVL PRT-LHVDAPSSHVDWTEGAVELLTEQTEW-PET---GRPR  
ampho\_004\_KS\_003.seq AAGVASI I KVMALRHGVL PQT-LHADELSPHVDWSPGTVRLLGENTEW-PQTG---RPR  
ampho\_004\_KS\_004.seq ASGVASI I KLVHALREGVAPKS-LHIDQPSHVDWSSGTIQLLTERTEW-PETG---RPR  
ampho\_004\_KS\_005.seq AAGVAGVIK MLLAMQHGTLP RT-LHVTSPSTHVDWSSGAVSLLTEERDW-PETG---RPR  
ampho\_004\_KS\_006.seq ASGVGGVIK MVLAMQHGLLPRS-LYTENPSSHVDWTAGNARLLTELTPW-PESE---RVR  
ampho\_005\_KS\_001.seq ASGVAGIMK MIMAMRNEVLPKT-LHVDREPSHVDWDTAGVVELLENRPW-PTAP---DRPR  
ampho\_005\_KS\_002.seq AAGVAGLVK MVMAMRNGVLP RT-LHITEPSTHVDWVSLGAVQLLTEETAW-PETG---RVR  
ampho\_005\_KS\_003.seq AAGAAGVIK MVMAMHQGTLP RT-LHVTEPSTHVDWVSLGAVRLLTEETAW-PETG---RVR  
ampho\_006\_KS\_001.seq AAGAAGVIK MVLALRHGGLP RT-LHIDAPSTHVDWDAGHVSLLEATPW-PEGE--Q-TR  
averm\_001\_KS\_001.seq AAGVGGVIK MVMALRHGVL PRT-LHVDKPSQVDWSAGAVRLLTEAVPW-PGDA--GRLR  
averm\_001\_KS\_002.seq AAGVAGVIK MVMALRHGGLP RT-LHVDEPSPHVDWSAGAVQLLLETVPW-PGG-E-GRLR  
averm\_002\_KS\_001.seq AAGVGGVIK MVMALRNGLLP RT-LHVDEPSPHVDWSAGAVQLLLETVPW-PGG-E-GRLR  
averm\_002\_KS\_002.seq AAGVGGVIK MVMALRNGLLP RT-LHVDEPSPHVDWSAGAVQLLLETVPW-PGG-E-GRLR  
averm\_002\_KS\_003.seq AAGVAGVIK MVMALRHGVL PPT-LHADELSPHVDWSAGAVQLLLETVPW-PGG-E-GRPR  
averm\_002\_KS\_004.seq AAGVGGVIK MVMALRNGLLPQT-LHVDEPTPQVDWSTGAVQLLTPVPW-PADPA-GRPR  
averm\_003\_KS\_001.seq AAGVGGVIK MVMALREGVLP RT-LHVDEPSPQVDWSAGAVRLLTEAVPW-PGDA--GRLR  
averm\_003\_KS\_002.seq AAGVAGVIK MVMALRNGLLP RT-LHVDEPSPHVDWSAGAVQLLLETVPW-PGG-E-GRLR  
averm\_003\_KS\_003.seq AAGVGGVIK MVMALRNGLLP RT-LHVDEPTPQVDWSTGAVQLLTPVPW-PADPA-GRPR  
averm\_004\_KS\_001.seq AAGVAGVIK MVMALRAGVLP RT-LHVDEPSSQVDWSSGVRVLADEVW-PGV-E-GRLR  
averm\_004\_KS\_002.seq AAGVAGVIK MVMALRAGVLP RT-LHVDEPSSQVDWSSGVRVLADEVW-PGV-E-GRLR  
averm\_004\_KS\_003.seq AAGVAGVIK MVMALNHELLPTS-LHIDEPSPHIDWSSGGVRLLETVPW-QQ--N-GRPR  
borre\_002\_KS\_001.seq AAGVAGVIK MVLAMEKGRVLP RT-LHVDEPSEVDWDSGAVRLLTEARDW-PSE-E-GRLR  
borre\_003\_KS\_001.seq AAGVAGVIK MVKAMQAGTLP RT-LHVDEPSEVDWDSGAVRLLTEARDW-PSE-E-GRLR  
borre\_003\_KS\_002.seq AAGVASVIK MVQAMQAGVLP RT-LHVDEPSEVDWDSGAVRLLTEAREW-PSG-E-GRVR  
borre\_004\_KS\_001.seq AAGVASVIK MVQAMQAGVLP RT-LHVDEPSEVDWDSGAVRLLTEAREW-PSG-E-GRVR  
borre\_005\_KS\_001.seq AAGVAGVIK MVLALRKRGLP RT-LHVDEPTGEVDWDSGAVRLLTEAREW-PSE-E-GRVR  
borre\_006\_KS\_001.seq AAGVAGVIK MVLAMEKGRVLP RT-LHVDEPSEVDWDSGAVRLLTEARDW-PSGE-G-RVR  
epoth\_002\_KS\_001.seq AAGIAGLIK TVLALERHQLP PS-LNFESFNPS IDFASSPFYVNTSLKDW-NTGS---TPR  
epoth\_003\_KS\_001.seq AAGVAGLIK AALS LTHE R I PRN-LNFRTL NPRIRIEGTALALATEPVPW-PRTD---RPR  
epoth\_003\_KS\_002.seq AAGLAGLKV LALALGQE I PAQ-PELGE L N P L P W E A L P V A V R A A V P W - P R T D --- R P R  
epoth\_003\_KS\_003.seq ASGLASLLKAVLALRHEQ I PAQ-PELGE L N P H L P W N T L P V A V P R K A V P W - G R G A --- R P R  
epoth\_003\_KS\_004.seq AAGVAGVIK VALALERGLP RS-LHFDA P N P H I P W S E L A V Q V A A K P V E W - T R N G --- A P R  
epoth\_004\_KS\_001.seq AAGVAGLIK ATLSLHHER I PRN-LNFRTL NPRIRIEGTALALATEPVPW-PRTG---RTR  
epoth\_004\_KS\_002.seq AAGLAGLVK VLLALEHEQ I PAQ-PELDE L N P H I P W A E L P V A V V R A A V P W - P R G A --- R P R  
epoth\_005\_KS\_001.seq AAGVAGLIK AALALHHE S I PRN-LHFHTL N P R I R I E G T A L A L A T E P V P W - P R A G --- R P R  
lasal\_001\_KS\_002.seq AAGVAGVIK TVMAMRHGGLP RT-LHVDEPSPHIDWTSAGAVSLLTEPVDW-HVG---DRPR  
lasal\_001\_KS\_003.seq AAGVAGVIK MVMAMRHGGLP RT-LHVDEPTPHVDWSTGAVSLLTEDTTW-PET---GRPR  
lasal\_002\_KS\_001.seq AAGMAGI I K M V M A M R H G I L P R T - L H V D E P S P H I D W T A G A V S L L T E P V D W - Q A G --- D R P R  
lasal\_002\_KS\_002.seq AAGMAGI I K T V M A M R H G L L P R T - L H L D E P T P H V D W T S G R V A L L T E P V A W - P V S --- D R P R  
lasal\_002\_KS\_003.seq AAGMAGI I K M V M A M R H G I L P R T - L H V D E P S P H I D W T A G A V S L L T E P V D W - Q A G --- D R P R  
lasal\_003\_KS\_001.seq AAGVAGVIK MVMAMRHGVL P RS-LHIDEPTPQVDWSSGAVTLLTEPVDW-PDS---DRPR  
lasal\_004\_KS\_001.seq AAGVAGVIK MVMAMRHGVL P RS-LHIDEPTPQVDWSSGAVTLLTEPVDW-PDS---DRPR  
lasal\_005\_KS\_001.seq AAGMAGI I K T V M A L R H G V L P R T - L H V D A P T P H V D W A S G L V S L L T E Q M P W - P E T --- G R P R  
lasal\_005\_KS\_002.seq AAGVAGVIK MVMAMRHGVL P ST-LHVDEPSPHVDWDTAGQME L L T D A R Q W - P E G --- R R P R  
lasal\_006\_KS\_001.seq AAGMAGLIK TVLAMRHGVM P RT-LHLEEPTPHVDWTSGRVSLLEQTAW-PAS---DRPR  
lasal\_007\_KS\_001.seq AAGVAGVIK MVMALRHGVL PQT-LHVDAPSPHIDWASGHVSLTEELKW-PGT---DRPR  
rapam\_001\_KS\_001.seq AAGVSGVIK MVMALRHGFV P RT-LHVDEPSRHVDWSAGAVELVAENRSW-PAT---GRPR  
rapam\_001\_KS\_002.seq AAGVSGVIK MVMALQRGFV P RT-LHVDEPSRHVDWSAGAVQLVTENQPW-PGT---DRPR  
rapam\_001\_KS\_003.seq ASGVSVVIK MVMALQHNTV P RT-LHVDEPSRHVDWAAGAVELVRENQPW-PGT---DRPR  
rapam\_001\_KS\_004.seq ASGVSGVIK MVMALRHGFV P RT-LHVDEPSRHVDWAAGAVELVRENQPW-PGT---DRPR  
rapam\_002\_KS\_001.seq AAGVSGVIK MVMALQHVLV P RT-LHVDEPSRHVDWTDGAVALVTENQPW-PDM---GRPR  
rapam\_002\_KS\_002.seq ASGVSGVIK MVMALQHNTV P RT-LHVDEPSRHVDWAAGAVELVRENQPW-PGT---DRPR  
rapam\_002\_KS\_003.seq AAGVSGVIK MVMALQHS TV P RT-LHVNEPSRHVDWSAGAVELVTENQSW-PVT---GRPR  
rapam\_002\_KS\_004.seq AAGVSGVIK MVMALQRGFV P RT-LHVDEPSRHVDWSAGAVALVTENQSW-PDM---GRAR  
rapam\_002\_KS\_005.seq AAGVSGVIK MVMALQHGLV P RT-LHVDEPSRHVDWTDGAVELVTENQSW-PDM---GRPR

rapam\_002\_KS\_006.seq AAGVSGVIKMMVALQHSMPVRT-LHVDEPSRHVDWSAGAVELVAENQPW-PET---GRPR  
rapam\_003\_KS\_001.seq AAGVSGVIKMMVALRHALVPRP-LHVDEPSRHVDWTAGAVELVTENQPW-PEI---GRPR  
rapam\_003\_KS\_002.seq AAGVSGVIKMMVALQHGVLPRP-LHVDEPSRHVDWSAGAVQLVTENQPW-PDM---GRAR  
rapam\_003\_KS\_003.seq ASGVSGVIKMMVALQHNTPVRT-LHVDEPSRHVDWAAGAVELVRENQPW-PGT---DRPR  
rapam\_003\_KS\_004.seq ASGVL SVIKMVEAMAHGSLPRT-LHVDAPSPHVDWTSQSVALLTEHQPW-PDD---TKLR  
nysta\_002\_KS\_001.seq AAGVAGVIKMMVALRHGHLPPPT-LHADAPSSHVDWSAGSVRLLTEGQQW-PETG---RPR  
nysta\_002\_KS\_002.seq AAGVAGVIKMMVALAMDAGELPPT-LHLDAPSSHVDWTAGAVELLRGRTPW-PES---GRPR  
nysta\_003\_KS\_001.seq ASGAAGVIKMMIALQRGVLPRT-LHATEPTTDVDWTAGSVDLLDETVAW-PET---GRAR  
nysta\_003\_KS\_002.seq AAGVAGVIKMMVAMRHGVLPPQT-LHVDAPSSHVDWSVGAVELLLETQTAW-PET---GRAR  
nysta\_003\_KS\_003.seq AAGVAGVIKMMVAMRHGVLPPQT-LHVDAPSSHVDWSVGAVELLLETQTAW-PET---GRVR  
nysta\_003\_KS\_004.seq AAGVAGVIKMMVAMRHGVLPRP-LNITEPSSHVDWSAGAVELLLETQTAW-PET---GRAR  
nysta\_003\_KS\_005.seq AAGVAGVIKMMVALMRHGVPVRT-LHVDAPSSHVDWSEGAVELLLETQAAW-PET---GRVR  
nysta\_003\_KS\_006.seq AAGVAGVIKMMVAMRHGVLPPQT-LHVDAPSSHVDWSVGAVELLLETQTVW-PET---GRVR  
nysta\_004\_KS\_001.seq AAGVAGVIKMMVAMRHGTLPPRT-LHAEEPTTHVDWSQGAVRLLTDTTDPW-PATG---APR  
nysta\_004\_KS\_002.seq AAGVAGVIKMMVALMRHGVPVRT-LHVDAPSSHVDWSEGAVELLLETQAAW-PET---GRVR  
nysta\_004\_KS\_003.seq AAGIASVIKMMVALRHGSLPPT-LHADAPSSHVDWSAGTVRLLTQARAW-PETG---RPR  
nysta\_004\_KS\_004.seq ASGVASVIKLVRLAQEGVVPKS-LHIDRPSHVDWSSGAI GLLTERTPW-PETG---RPR  
nysta\_004\_KS\_005.seq AAGAAGVIKMLMAMRHGTLPPRT-LHVGT PSSHVDWSGGTVALLDDARPW-PRTG---QPR  
nysta\_004\_KS\_006.seq ASGVGGVIKMMVALMQHGLPRT-LYAENPSSHVDWTAGRAHLLTARTPW-PDSG---RPR  
nysta\_005\_KS\_001.seq ASGVAGVIKMMVAMRHGVLPRP-LHVDRPSTHVDWTTGSGVLLTDAPW-PET---GRPR  
nysta\_005\_KS\_002.seq AAGAAGLVKMMVAMRHGILPQT-LHLEPSSHVDWSAGTVRLLTERTAW-PRTD---RPR  
nysta\_005\_KS\_003.seq AAGAAGLMKMMVALQHGTLPPRT-LHVTEPSTRVDWSAGAVRLLTERTVW-PRTD---RPR  
nysta\_006\_KS\_001.seq AAGVAGVIKMMVALRHGVLPPQT-LHVDAPSSHVDWESGAVRLLTAPVAW-SEG D---DRVR  
spino\_002\_KS\_001.seq AAGVAGVIKMMVAMRHGVLPPRT-LHVESPSPEVDWSAGTVQLLLENTPW-PRS---GRVR  
spino\_003\_KS\_001.seq AAGVAGVIKMMVAMRHGELPRT-LHVDEPNSHVDWSAGAVRLLTENIRW-PGT---GT-R  
spino\_003\_KS\_002.seq AAGVAGVIKMMVAMRHGQLPAS-LHADEPTSEVDWSSGAVRLLAEQVW-PES---DRVR  
spino\_004\_KS\_001.seq AAGVAGVIKMMVALMRHQGLPAT-LHVDEPTSAVDWSAGSVRLLTENTPW-PDS---GRPC  
spino\_004\_KS\_002.seq AAGVAGVIKMMVAMRHGQLPRT-LHVDEPSAQVDWSAGTVQLLLENTPW-PDS---GLR  
spino\_004\_KS\_003.seq AAGVAGVIKMMVQMRHGELPAT-LHVDKPTPQVDWSAGAVRLLTGNTPW-PES---GRPR  
spino\_005\_KS\_001.seq AAGVAGVIKSVLAI RHREMPRS-LHIDQPSQHVVDWSAGAVRLLTDSVDW-PDL---GRPR  
spino\_005\_KS\_002.seq AAGVAGVIKMMVAMRHGQLPAT-LHVDEPTSEVDWSAGDVQLLLENTPW-PGN---SHPR  
spino\_005\_KS\_003.seq AAGVAGVIKMMVAMRHGQLPRT-LHVDAPSSQVDWSAGRVQLLLENTPW-PDS---GRPC  
tylac\_001\_KS\_002.seq AAGVAGVIKMMVALMRYGWLPRT-LHVDEPSRHVDWSAGGVWLLTEAREW-PGV---DRPR  
tylac\_001\_KS\_003.seq AAGVAGVIKMMVALMRYGWLPRT-LHVDEPSRHVDWSAGGVWLLTEAREW-PGV---DRPR  
tylac\_002\_KS\_001.seq AAGVAGVIKMMVALMRHGRLPRT-LHVDRPTTRVDWEKGGVRLLETPVPW-PGEA-G-EPR  
tylac\_003\_KS\_001.seq AAGVAGVIKMMVALMRHGRLPRT-LHVDEPSRHVDWSAGGVWLLTEAREW-PGV---DRPR  
tylac\_003\_KS\_002.seq AAGVAGVIKMMVALGNETLPRT-LHVDEPTPRVDWSSGAVSLLTEPVDW-PAGP-S-APR  
tylac\_004\_KS\_001.seq AAGVAGVIKMMVALMRYGWLPRT-LHVDEPSRHVDWSAGGVWLLTEAREW-PGV---DRPR  
tylac\_005\_KS\_001.seq AAGVGGVIKMLQALRHGGLPRT-LHADEPTPHADWSSGRVRLLETPVPW-QR-T-G-RPR  
nidda\_001\_KS\_002.seq AAGIAGVIKMMVALRHGTLPPRT-LHADHPSSKVDWDAGPLQLLTDARPW-PADP-D-RPR  
nidda\_001\_KS\_003.seq AAGIAGVIKMIQAMHHGTLPPRT-LHVDAPTSQVDWEAGSLQLLAEARPW-PADP-D-RPR  
nidda\_002\_KS\_001.seq AAGIAGVIKMIQAMHHGTLPPRT-LHVDHPSSKVDWKAGSLQLLQARAW-PADP-D-RPR  
nidda\_003\_KS\_001.seq AAGIAGVIKMMVALRHGTLPPRT-LHADHPSSKVDWEAGPLQLLQARAW-PADP-D-RPR  
nidda\_003\_KS\_002.seq AAGVAGVIKMMVALRHGTLPPRT-LHVDRPTSKVDWETGRVRLLDARPW-PAGP---DRPR  
nidda\_004\_KS\_001.seq AAGVAGVIKMMVALRHGTLPPRT-LHADHPSSKVDWDAGPLRLLTDARPW-PADP-D-RPR  
nidda\_005\_KS\_001.seq AAGIAGVIKMIQAMHHGTLPPRT-LHVDHPSSKVDWKAGSLQLLQARAW-PADP-D-RPR  
monen\_001\_KS\_002.seq AAGVAGVIKMMVAMRHDLPPAT-LHVDEPSGHVDWSTGAVRLLTEPVPW-PRG---ERPR  
monen\_002\_KS\_001.seq TAGVAGVIKTVMAIRNGLLPAT-LHVEELSPHVDWDAGAVEVTEPTW-PED---GHRP  
monen\_003\_KS\_001.seq AAGAAGVIKMMVALRHETLPAT-LYADEPTPHADWESGAVRLLSAPVAW-PRGEHGEHTR  
monen\_003\_KS\_002.seq AAGVAGVIKMMVALRHGQLPPT-LHADEPTPHVQWDGGGVRLLTEPVPW-SRG---ERTR  
monen\_004\_KS\_001.seq AAGVAGVIKMMVALQRELLPAT-LYVDEPTPHVDWSSGVRLLTEPVPW-TRGE---RPR  
monen\_004\_KS\_002.seq AAGVAGVIKMMVAMRHGVVPAS-LHVDVPSPHVEWDSGAVRLAVESVPW-PQVE---GRPR  
monen\_005\_KS\_001.seq AAGVAGVIKMMVALQRELLPAT-LNVDEPTPHVQWEGGGVRLLTEPVPW-SRGE---RPR  
monen\_005\_KS\_002.seq AAGVAGVIKMMVAMRHGVVPAS-LHVDVPSPHVEWDSGAVRLAVESVPW-PEV-E-GRPR  
monen\_006\_KS\_001.seq AAGVAGVIKMMVAMRHGELPAS-LHIDRPTPHVDWEGGGVRLLTDPVPW-PRP---DRPR  
monen\_007\_KS\_001.seq AAGVAGVIKMMVALRHGDLPPAI-LHVDAPSPHVEWDSGLRLLTDPVKW-PRG---ERPR  
monen\_008\_KS\_001.seq AAGVAGVIKMMVAMRNGLLPTS-LHIDAPSPHVQWEGGVRLLSEPVVDW-PA---ERTR  
monen\_008\_KS\_002.seq SAGVAGVIKMMVALRNEQLPAS-LHIDAPTPHVDWDGSGVRLLSEPVSW-PRG---ERPR  
oligo\_001\_KS\_002.seq AAGVAGVIKSVLALRNGLLPKT-LHVDEPTPEVDWSAGAVELLTEGREW-PET---DGPR  
oligo\_001\_KS\_003.seq AAGMAGVLKTVLALRNHGLPRT-LHAARPTPKVDWTEGAVELLTETRPW-PAT-G-ARPR  
oligo\_001\_KS\_004.seq AAGVAGVIKSVLALRNGLLPAT-LHVDEPSREVDWSAGAVELLTEGREW-PETD---GPR  
oligo\_002\_KS\_001.seq AAGMAGVIKMMVALMRHGLPRT-LHVDEPTPQVDWSAGAVRLLTEEQTW-PSTG---RPR  
oligo\_002\_KS\_002.seq AAGVGGVIKMMVALRHGVLPPRT-LHVDEPTPEVDWSAGTVGLLLENTREW-PHTG---KPR  
oligo\_003\_KS\_001.seq AAGVGGVIKMMVALRHGVLPPRT-LHAEEPTPNVDWSSGAVELLTEARPW-PA-S-D-TPR  
oligo\_003\_KS\_002.seq AAGVGGVIKMMVALHHGVLPPRT-LHIDEPTPHVDWTAGAVDLLTETRPW-PETG---RPR  
oligo\_004\_KS\_001.seq AAGAAGVIKMMVAMRHGQLPRT-LHVDRPTPEVDWSEGAVELLLETNRPW-PRG---DRPR  
oligo\_004\_KS\_002.seq AAGAAGVIKMMVAMRHGVLPPRT-LHVDRPSPPEVDWSPGTVELLLETREW-PDA---GRPR  
oligo\_005\_KS\_001.seq AAGVSGVIKMMVALRHGVPKPT-LHVDEPTPHVDWSSGAVRLLTENRPW-PGHG---RPR  
oligo\_006\_KS\_001.seq AAGVSGVIKAVLSLQHGGLLPKT-LHVDEPTPQVDWSAGAVELLTQAREW-PETD---GPR  
oligo\_006\_KS\_002.seq AAGVAGVIKAVLALRNGLLPKT-LHVDEPTPQVDWSAGAVELLTQAREW-PDAE---RPR  
oligo\_006\_KS\_003.seq AAGVAGVIKSVLALRNGLLPKT-LNVDEPTPKVDWSAGAVELLTQAREW-PQGE---RPR  
oligo\_007\_KS\_001.seq VSGVAGVIKTVLALRNHGLPRT-LHVGPSTQVDWSAGAVELLTEGREW-PETG---GPR  
oligo\_007\_KS\_002.seq AAGVAGVIKSVLALRNGLLPKT-LHVDEPTPEVDWSAGAVELLTEGREW-PETD---GPR  
rifam\_001\_KS\_001.seq AAGVAGVIKMMVAMRHGTLPPRT-LHVDRPSSYVDWSAGAVELLTEARDW-VSN---GHRP  
rifam\_001\_KS\_002.seq AAGVAGVIKMMVAMRHGTLPPRT-LHVDRPSSYVDWSAGAVELLTEARDW-VSN---GHRP  
rifam\_001\_KS\_003.seq AAGVGGVIKMMVAMRHGVLPPAT-LHVDERTSQVDWSAGAVELLTEAREW-PRN---GRPR  
rifam\_002\_KS\_001.seq ASGVAGVIKMMVQSLRHGQLPAT-QHVDAPTPQVDWSAGAVELLTEAREW-PR-N-G-HPR

rifam\_002\_KS\_002.seq AAGVAAVIKMQALRHDTPPT-LHVQEPTKQVDWSAGAVELLTEGREW-AR-N-G-HPR  
 rifam\_002\_KS\_003.seq AAGVAGVIKMQALRHEVLPPT-LHVDRPTPEVDWSAGAVELLTEAREW-PRN---GRPR  
 rifam\_003\_KS\_001.seq AAGVASVIKVVQALRHGVMPPPT-LHVDEPSSQVDWSEAGAVELLTGSRDW-PR-G-D-RPR  
 rifam\_004\_KS\_001.seq AAGVASVIKMQALRHGVLPPPT-LHVDRPSTEVDWSAGAVSLLTEAREW-PRE---GRPR  
 rifam\_005\_KS\_001.seq AAGVAGVIKMQALRHGAMPPT-LHVAEPTPEVDWSAGAVELLTEPREW-PAG---DRPR  
 rifam\_005\_KS\_002.seq AAGVAGVIKMQALRHGVMPPPT-LHVDRPTSQVDWSAGAVEVLTAREW-PR-N-G-RPR  
 pikro\_001\_KS\_002.seq AAGVSGVIKMQALRHGVLPPPT-LHVDEPSSQVDWSAGAVELLTEAVDW-PEKQD-GGLR  
 pikro\_001\_KS\_003.seq AAGAAGI IKMVLAMRHGTLPKT-LHADEPSPHVDWANSGLALVTEPIDW-PAGT---GPR  
 pikro\_002\_KS\_001.seq AAGVSGVIKMQAMRHGVLPPPT-LHVEKPTDQVDWSAGAVELLTEAMDW-PDKGD-GGLR  
 pikro\_002\_KS\_002.seq AAGVSGI IKMVMALRHGVLPPPT-LHVDRPSDQIDWSAGTVELLTEAMDW-PRKQE-GGLR  
 pikro\_003\_KS\_001.seq AAGVAGVIKMQALRHGVLPPPT-LHVDEPSSQVDWSAGTVELLTEAVDW-PERQ-DGGLR  
 pikro\_004\_KS\_001.seq ASGVAGVIKMQALRHGVLPPPT-LHVDEPTDQVDWSAGSVELLTEAVDW-PERP-G-RLR  
 Stamb\_001\_KS\_002.seq AAGVAGVIKTVLALRHGVLPPPT-LHADEPTPHVDWSAGAVRLLTENVTL-PPAD---RPY  
 Stamb\_001\_KS\_003.seq AAGVGGI IKTVLALRHGVLPPPT-LHADEPSSHVDWSAGAVELLTEREW-PSV---GRPR  
 Stamb\_001\_KS\_004.seq AAGIAGVIKMLLAMDHGELPPT-LHAAAPSPSVDWDSGLSLLTETTPWTPRVD---RPR  
 Stamb\_002\_KS\_001.seq AAGVAGVIKTVMALRHGVLPPPT-LHADEPTRQVDWSTGAVRLLTENRW-PGP---GRTR  
 Stamb\_002\_KS\_002.seq AAGVAGVIKMQALRSVVVPPAT-LHVDEPTSHVDWSAGGIRLAVESRAW-PETG---RAR  
 Stamb\_003\_KS\_001.seq ASGVVGIKSVLALRNLPPPT-LHVAVPTPHVWEGRVLLADARPW-PRTD---VPR  
 Stamb\_003\_KS\_002.seq AAGVAGVIKMQALRSVTPPAT-LHVDEPTPHVDWTTGAVRLAVASRAW-PETG---RAR  
 Stamb\_003\_KS\_003.seq AAGVAGVIKVMALRHGVLPPPT-LHDEPTEPHVDWSAGAVELLTEARPW-PLSD---RPH  
 Stamb\_003\_KS\_004.seq ASGVAGVIKVMAMRHGVLPPAT-LHVDEPTPHVDWSTGAVKLLTDARPW-TVTD---RPR  
 Stamb\_003\_KS\_005.seq AAGVAGVIKMLALRHGTLPPPT-LHADEPTEQVDWSAGAVELLTRARPW-PEAD---RPR  
 Stamb\_004\_KS\_001.seq AAGVAGVIKMQALRHERLPPT-LHVDEPSTQVDWSAGAVELLTEGRSW-PRG---ERPR  
 Stamb\_004\_KS\_002.seq AAGVAGI IKMVMALRHGVLPPPT-LHITEPTRHVDWDGSGVRLLTRQVW-ADTE---RPR  
 Stamb\_004\_KS\_003.seq AAGVGGVIKTVMALREGVLPPT-LHIDAPTPHVDWSTGAVELLTETIPW-PDTD---GRPR  
 Stamb\_005\_KS\_001.seq AAGMAGVIKMEGLRRGVLPPPT-LHVDAPTPQVDWSAGAVELLTETRPW-PETG---RPR  
 Stamb\_006\_KS\_001.seq ASGVAGVIKMQAMRHGVLPPPT-LHVDAPSPHVDWSSGSVELLTENRSW-PDS---GGPR  
 Stamb\_006\_KS\_002.seq AAGVAGVIKMEALRRGVLPPPT-LHVDEPTPQVDWSAGAVELLTEARPW-PET---DRPR  
 Stamb\_007\_KS\_001.seq ASGVAGLIKVMALRAGELPPT-LHVTEPTPHVDWSQGHVRLTDSASW-PQDP---ERPR  
 Stamb\_007\_KS\_002.seq AAGVGGVIKTVMALRHGVLPPPT-LHVTEPTPEVDWTTGAVELLTEARPW-PEPD---RPR  
 Stamb\_008\_KS\_001.seq AAGAAGVIKMLAMSHGVLPPPT-LHADVPTPHVDWSSGRIELLTAEQWP-EPGE---QPR  
 Stamb\_008\_KS\_002.seq AAGAGGVIKMQALRHGVLPPPT-LHADEPTPHVDWSSGAVELLTQALEW-PSG---EQR  
 Stamb\_009\_KS\_001.seq AAGAGGVIKMQALRHGVLPPPT-LHADEPTPHVDWSSGAVELLTQALEW-PSGE---QPR  
 Stamb\_009\_KS\_002.seq AAGVVGVIKAVMALRHGVLPPAT-LHVDEPTPEVDWSSGAVELLTENRTW-PEA---GRPR  
 Stamb\_009\_KS\_003.seq AAGVAGVIKMEALRHGVLPPPT-LHAREPSAQVDWSAGAVELLTDARRW-PET---DRPR  
 Stamb\_009\_KS\_004.seq ASGIAGVIKTVVEAIRRGVLPPT-LHVDEPTPEVDWSAGAVELLTDDRPW-PDTG---RAR

:\* ::\* :. \* . :

mycol\_001\_KS\_001.seq TAAVSSFGISGTNAHLIL-----  
 mycol\_001\_KS\_002.seq TAAVSSFGISGTNAHLIL-----  
 mycol\_001\_KS\_003.seq TAAVSSFGISGTNAHLIL-----  
 mycol\_001\_KS\_004.seq TAAVSSFGISGTNAHLIL-----  
 mycol\_001\_KS\_005.seq TAAVSSFGISGTNAHLIL-----  
 mycol\_001\_KS\_006.seq TAAVSSFGISGTNAHLIL-----  
 mycol\_001\_KS\_007.seq TAAVSSFGISGTNAHLIL-----  
 mycol\_001\_KS\_008.seq TAAVSSFGISGTNAHLIL-----  
 mycol\_002\_KS\_001.seq TAAVSSFGISGTNAHLIL-----  
 mycol\_003\_KS\_001.seq TAAVSSFGISGTNAHLIL-----  
 mycol\_003\_KS\_002.seq TAAVSSFGISGTNAHLIL-----  
 mycol\_003\_KS\_003.seq TAAVSSFGISGTNAHLIL-----  
 mycol\_003\_KS\_004.seq TAAVSSFGISGTNAHLIL-----  
 mycol\_003\_KS\_005.seq TAAVSSFGISGTNAHLIL-----  
 mycol\_003\_KS\_006.seq TAAVSSFGISGTNAHLIL-----  
 mycol\_003\_KS\_007.seq TAAVSSFGISGTNAHLIL-----  
 eryth\_001\_KS\_001.seq RAGVSSFGISGTNAHAIIEEAP---  
 eryth\_001\_KS\_002.seq RAGVSAFGVSGTNAHVIAEPP---  
 eryth\_002\_KS\_001.seq RARVSAFGISGTNAHVIVEEAP---  
 eryth\_002\_KS\_002.seq RAGVSSFGVSGTNAHVIVEEAP---  
 eryth\_003\_KS\_001.seq RAGVSSFGISGTNAHVIVEEAP---  
 eryth\_003\_KS\_002.seq RAGVSAFGVSGTNAHVIAEPP---  
 ampho\_002\_KS\_001.seq RAAVSSFGISGTNAHAVLEQAP---  
 ampho\_002\_KS\_002.seq RAGISSFGISGTNAHLLLEQAP---  
 ampho\_003\_KS\_001.seq RAGVSSFGISGTNAHLILEQAP---  
 ampho\_003\_KS\_002.seq RAAVSSFGISGTNAHVIEQP---  
 ampho\_003\_KS\_003.seq RAAVSSFGISGTNAHVILEQP---  
 ampho\_003\_KS\_004.seq RAGVSSFGISGTNAHVILEQP---  
 ampho\_003\_KS\_005.seq RAGVSSFGISGTNAHVILEQP---  
 ampho\_003\_KS\_006.seq RAGVSSFGISGTNAHVILEQP---  
 ampho\_004\_KS\_001.seq RAAVSSFGISGTNAHTIVEQAP---  
 ampho\_004\_KS\_002.seq RAAVSSFGISGTNVHTVLEQAP---  
 ampho\_004\_KS\_003.seq RAAVSSFGISGTNAHVILEQP---  
 ampho\_004\_KS\_004.seq RAAVSSFGLSGTNVHTVLEQAP---  
 ampho\_004\_KS\_005.seq RAGVSAFGVSGTNAHVIVEQAP---  
 ampho\_004\_KS\_006.seq RAAVSSFGASGTNAHLILEQAP---  
 ampho\_005\_KS\_001.seq RSGVSSFGVSGTNAHVIVEQAP---  
 ampho\_005\_KS\_002.seq RAGVSSFGISGTNAHVILEGAP---  
 ampho\_005\_KS\_003.seq RAGVSSFGISGTNAHVILEGAP---

|                      |                            |
|----------------------|----------------------------|
| ampho_006_KS_001.seq | RAGVSSFGISGTNAHVILEEAP---  |
| averm_001_KS_001.seq | RAGVSSFGIGGTNAHVILEEAP---  |
| averm_001_KS_002.seq | RAGVSSFGVSGTNAHVILEEAP---  |
| averm_002_KS_001.seq | RAGVSSFGVSGTNAHVILEEAP---  |
| averm_002_KS_002.seq | RAGVSSFGVSGTNAHVILEEAP---  |
| averm_002_KS_003.seq | RAGVSSFGVSGTNAHVILEEAP---  |
| averm_002_KS_004.seq | HAGVSSFGVSGTNAHVILEEAP---  |
| averm_003_KS_001.seq | RAGVSSFGVSGTNAHVILEEAP---  |
| averm_003_KS_002.seq | RAGVSSFGVSGTNAHVILEEAP---  |
| averm_003_KS_003.seq | HAGVSSFGVSGTNAHVILEEAP---  |
| averm_004_KS_001.seq | RAGVSAFGVSGTNAHVILEE-----  |
| averm_004_KS_002.seq | RAGVSAFGVSGTNAHVILEE-----  |
| averm_004_KS_003.seq | RAGVSAFGVSGTNAHVILEEQAP--- |
| borre_002_KS_001.seq | RAGVSSFGISGTNAHVILEEAP---  |
| borre_003_KS_001.seq | RAGVSSFGISGTNAHVILEEPP---  |
| borre_003_KS_002.seq | RAGVSSFGISGTNAHVILEEPP---  |
| borre_004_KS_001.seq | RAGVSSFGISGTNAHVILEEPP---  |
| borre_005_KS_001.seq | RAGVSSFGISGTNAHVILEEAP---  |
| borre_006_KS_001.seq | RAGVSSFGISGTNAHVILEEPP---  |
| epoth_002_KS_001.seq | RAGVSSFGIGGTNAHVILEEAP---  |
| epoth_003_KS_001.seq | FAGVSSFGMSGTNAHVILEEAP---  |
| epoth_003_KS_002.seq | FAGVSSFGMSGTNAHVILEEAP---  |
| epoth_003_KS_003.seq | RAGVSAFGLSGTNVHVILEEAP---  |
| epoth_003_KS_004.seq | RAGVSSFGVSGTNAHVILEEAP---  |
| epoth_004_KS_001.seq | FAGVSSFGMSGTNAHVILEEAP---  |
| epoth_004_KS_002.seq | RAGVSAFGLSGTNAHVILEEAP---  |
| epoth_005_KS_001.seq | FAGVSAFGLSGTNVHVILEEAP---  |
| lasal_001_KS_002.seq | RAGVSSFGISGTNAHVILED-----  |
| lasal_001_KS_003.seq | RAAVSSFGISGTNAHVILEAP----- |
| lasal_002_KS_001.seq | RAGVSSFGISGTNAHVILEQAP---  |
| lasal_002_KS_002.seq | RAGVSSFGASGTNAHVILEQ-----  |
| lasal_002_KS_003.seq | RAGVSSFGISGTNAHVILEHVAEVP  |
| lasal_003_KS_001.seq | RAGVSAFGISGTNAHVILEQAP---  |
| lasal_004_KS_001.seq | RAGVSAFGISGTNAHVILEQAP---  |
| lasal_005_KS_001.seq | RAGVSSFGVSGTNAHVILEQ-----  |
| lasal_005_KS_002.seq | RAAVSSFGISGTNAHVILEAAP---  |
| lasal_006_KS_001.seq | RAGVSSFGMSGTNAHVILEEAP---  |
| lasal_007_KS_001.seq | RAGVSSFGISGTNAHVILEAAPP--  |
| rapam_001_KS_001.seq | RAGVSAFGVSGTNAHVILEGAP---  |
| rapam_001_KS_002.seq | RAGVSSFGISGTNAHVIL-----    |
| rapam_001_KS_003.seq | RAGVSSFGVSGTNAHVILESAP---  |
| rapam_001_KS_004.seq | RAGVSSFGVSGTNAHVILESAP---  |
| rapam_002_KS_001.seq | RAGVSSFGISGTNAHVILESAP---  |
| rapam_002_KS_002.seq | RAGVSSFGVSGTNAHVILESAP---  |
| rapam_002_KS_003.seq | RAGVSAFGVSGTNAHVILESAP---  |
| rapam_002_KS_004.seq | RAGVSSFGISGTNAHVILESAP---  |
| rapam_002_KS_005.seq | RAGVSSFGVSGTNAHVILESAP---  |
| rapam_002_KS_006.seq | RAGVSSFGISGTNAHVILESAP---  |
| rapam_003_KS_001.seq | RAGVSSFGVSGTNAHVILESAP---  |
| rapam_003_KS_002.seq | RAGVSSFGISGTNAHVILESAP---  |
| rapam_003_KS_003.seq | RAGVSSFGVSGTNAHVILESAP---  |
| rapam_003_KS_004.seq | RAGVSSFGLSGTNAHVILEQ-----  |
| nysta_002_KS_001.seq | RAAVSSFGISGTNAHALLEQAP---  |
| nysta_002_KS_002.seq | RAGVSSFGISGTNAHLILEQAP---  |
| nysta_003_KS_001.seq | RAGVSSFGISGTNAHVILEQAP---  |
| nysta_003_KS_002.seq | RAGVSSFGISGTNAHVILEQSP---  |
| nysta_003_KS_003.seq | RAGVSSFGISGTNAHVIVEQP---   |
| nysta_003_KS_004.seq | RAGISSFGISGTNAHVILEQP---   |
| nysta_003_KS_005.seq | RAGVSSFGISGTNAHVILERP---   |
| nysta_003_KS_006.seq | RAGVSSFGISGTNAHVILEQP---   |
| nysta_004_KS_001.seq | RAAVSSFGISGTNAHTIIEQAP---  |
| nysta_004_KS_002.seq | RAGVSSFGISGTNVHVIVEQAP---  |
| nysta_004_KS_003.seq | RAAVSSFGISGTNAHVILLEQAP--- |
| nysta_004_KS_004.seq | RAAVSSFGISGTNVHTILEQAP---  |
| nysta_004_KS_005.seq | RAGVSAFGVSGTNAHVIVEQAP---  |
| nysta_004_KS_006.seq | RAAVSSFGASGTNAHAILEQPP---  |
| nysta_005_KS_001.seq | RTGISSFGVSGTNAHVIVEQAP---  |
| nysta_005_KS_002.seq | RAGVSSFGISGTNAHVILEQPP---  |
| nysta_005_KS_003.seq | RAGVSSFGISGTNAHVILEQPP---  |
| nysta_006_KS_001.seq | RAGVSSFGISGTNAHVILEQAP---  |
| spino_002_KS_001.seq | RVGVSSFGISGTNAHVILE-----   |
| spino_003_KS_001.seq | RAGVSSFGVSGTNAHVILEHDP---  |
| spino_003_KS_002.seq | RVGVSSFGISGTNAHVILE-----   |
| spino_004_KS_001.seq | RVGVSSFGISGTNAHVILEQSP---  |
| spino_004_KS_002.seq | RAGVSSFGISGTNAHLILEQPP---  |
| spino_004_KS_003.seq | RAGVSSFGISGTNAHLILE-----   |
| spino_005_KS_001.seq | RAGVSSFGMSGTNAHLIVEE-----  |

|                      |                            |
|----------------------|----------------------------|
| spino_005_KS_002.seq | RVGVSSFGISGTNAHVILEQA----  |
| spino_005_KS_003.seq | RVGVSSFGISGTNAHVILE-----   |
| tylac_001_KS_002.seq | RAAVSAFGVSGTNAHLILE-----   |
| tylac_001_KS_003.seq | RAAVSAFGVSGTNAHLILE-----   |
| tylac_002_KS_001.seq | RAGVSSFGASGTNAHVILE-----   |
| tylac_003_KS_001.seq | RAAVSAFGVSGTNAHLILE-----   |
| tylac_003_KS_002.seq | RAAVSSFGISGTNAHTILE-----   |
| tylac_004_KS_001.seq | RAAVSAFGVSGTNAHLILE-----   |
| tylac_005_KS_001.seq | RTGVSAFGVGGTNAHVILE-----   |
| nidda_001_KS_002.seq | RAGISAFGVSGTNAHVILEEPP---  |
| nidda_001_KS_003.seq | RAGISAFGVSGTNAHVILEEPP---  |
| nidda_002_KS_001.seq | RAAVSAFGVSGTNAHAIIEEPP---  |
| nidda_003_KS_001.seq | RAGISAFGVSGTNAHAIIEEPP---  |
| nidda_003_KS_002.seq | RAGISAFGISGTNAHVILEEPP---  |
| nidda_004_KS_001.seq | RAGISSFGVSGTNAHVILEEPP---  |
| nidda_005_KS_001.seq | RAAVSAFGVSGTNAHTIIEEPP---  |
| monen_001_KS_002.seq | RAAVSSFGISGTNAHLVLEE-----  |
| monen_002_KS_001.seq | RAGVSAFGISGTNAHLILEEAP---  |
| monen_003_KS_001.seq | RAGISSFGISGTNAHLILEEAP---  |
| monen_003_KS_002.seq | RAGVSSFGISGTNAHLILEEPP---  |
| monen_004_KS_001.seq | RAGVSAFGMSGTNAHVILEEAP---  |
| monen_004_KS_002.seq | RAGVSSFGASGTNAHVIVESVP---  |
| monen_005_KS_001.seq | RAGISSFGISGTNAHVILEEAP---  |
| monen_005_KS_002.seq | RAGVSSFGASGTNAHVIVESVP---  |
| monen_006_KS_001.seq | RAGVSSFGISGTNAHLIVEQAP---  |
| monen_007_KS_001.seq | RAGVSSFGFSGTNAHLILEEAP---  |
| monen_008_KS_001.seq | RAGISAFGISGTNAHLILEEAP---  |
| monen_008_KS_002.seq | RAGVSAFGISGTNAHLILEQAP---  |
| oligo_001_KS_002.seq | RAGVSAFGISGTNAHVILE-----   |
| oligo_001_KS_003.seq | RAGVSAFGVSGTNAHVILE-----   |
| oligo_001_KS_004.seq | RAGVSAFGISGTNAHVILE-----   |
| oligo_002_KS_001.seq | RSAVSSFGISGTNAHVILE-----   |
| oligo_002_KS_002.seq | RVGVSAFGVSGTNAHVILE-----   |
| oligo_003_KS_001.seq | LAAVSSFGISGTNAHVILE-----   |
| oligo_003_KS_002.seq | RAGVSSFGVSGTNAHVILE-----   |
| oligo_004_KS_001.seq | RAGVSSFGISGTNVHVILE-----   |
| oligo_004_KS_002.seq | RAAVSSFGISGTNAHVILE-----   |
| oligo_005_KS_001.seq | RAAVSSFGVSGTNAHLILE-----   |
| oligo_006_KS_001.seq | RAGVSSFGISGTNAHVILE-----   |
| oligo_006_KS_002.seq | RAGVSSFGISGTNAHVILE-----   |
| oligo_006_KS_003.seq | RAGVSSFGISGTNAHVIE-----    |
| oligo_007_KS_001.seq | RAGVSSFGISGTNAHVILE-----   |
| oligo_007_KS_002.seq | RAGVSSFGISGTNAHVILE-----   |
| rifam_001_KS_001.seq | RAGVSSFGVSGTNAHLILEEAP---  |
| rifam_001_KS_002.seq | RAGVSSFGIGGTNAHVILEE-----  |
| rifam_001_KS_003.seq | RAGVSSFGASGTNAHLIEEGP---   |
| rifam_002_KS_001.seq | RGGISSFGASGTNAHMILEEAP---  |
| rifam_002_KS_002.seq | RAGVSSFGISGTNAHLILEEAP---  |
| rifam_002_KS_003.seq | RAGVSAFGVSGTNAHLILEEAP---  |
| rifam_003_KS_001.seq | RAGVSSFGVSGTNVHLIEEAP---   |
| rifam_004_KS_001.seq | RAGVSSFGISGTNAHLILEEAP---  |
| rifam_005_KS_001.seq | RAGVSAFGISGTNAHLILEEAP---  |
| rifam_005_KS_002.seq | RAGVSSFGISGTNAHLIEEAP---   |
| pikro_001_KS_002.seq | RAAVSSFGISGTNAHVILEEAP---  |
| pikro_001_KS_003.seq | RAAVSSFGISGTNAHVILEQAP---  |
| pikro_002_KS_001.seq | RAAVSSFGVSGTNAHVILEEAP---  |
| pikro_002_KS_002.seq | RAAVSSFGISGTNAHVILEEAP---  |
| pikro_003_KS_001.seq | RAAVSSFGISGTNAHVILEEAP---  |
| pikro_004_KS_001.seq | RAGVSAFGVGGTNAHVILEEAP---  |
| Stamb_001_KS_002.seq | RAGVSSFGISGTNAHAVILEAAP--- |
| Stamb_001_KS_003.seq | RAAVSSFGISGTNAHTVIEQAP---  |
| Stamb_001_KS_004.seq | RAAVSSFGISGTNAHVILEQ-----  |
| Stamb_002_KS_001.seq | RAAVSSFGVSGTNAHTVLEQAP---  |
| Stamb_002_KS_002.seq | RAGVSSFGMSGTNAHVIEQAEP---  |
| Stamb_003_KS_001.seq | RIGVSAFGVSGTNAHLILEEAP---  |
| Stamb_003_KS_002.seq | RAGVSSFGMSGTNAHVIEQAEP---  |
| Stamb_003_KS_003.seq | RAGVSSFGISGTNAHVIL-----    |
| Stamb_003_KS_004.seq | RAGVSSFGISGTNAHILLESAP---  |
| Stamb_003_KS_005.seq | RAGVSSFGISGTNAHVILEAEP---  |
| Stamb_004_KS_001.seq | RAGVSSFGVSGTNGHVILEEAP---  |
| Stamb_004_KS_002.seq | RAAVSSFGMSGTNAHTILEQ-----  |
| Stamb_004_KS_003.seq | RAGVSSFGGSGTNAHLVLEQ-----  |
| Stamb_005_KS_001.seq | RAGVSSFGVSGTNAHVIL-----    |
| Stamb_006_KS_001.seq | RAGVSSFGVSGTNAHVIL-----    |
| Stamb_006_KS_002.seq | RAGVSSFGVSGTNAHVILEAAP---  |
| Stamb_007_KS_001.seq | RAGVSSFSISGTNAHLVL-----    |
| Stamb_007_KS_002.seq | RAGVSAFGISGTNAHVLEHAP---   |

```
Stamb_008_KS_001.seq  RAAVSSFGISGTNAHVILEEAP---
Stamb_008_KS_002.seq  RAAVSSFGISGTNAHVVLEE-----
Stamb_009_KS_001.seq  RAAVSSFGVSGTNAHVVLEE-----
Stamb_009_KS_002.seq  RAGVSSFGISGTNAHTILEQ-----
Stamb_009_KS_003.seq  RAGVSSFGMSGTNAHVILESAP---
Stamb_009_KS_004.seq  RAGVSSFGISGTNAHVLIIEEAP---
                        :*:*. .*** * ::
```



## References

- [1] D. G. Gibson, *Methods Enzymol.*, 2011, **498**, 349.
- [2] L. A. Kelley and M. J. E. Sternberg, *Nat. Protoc.*, 2009, **4**, 363.
- [3] A. Roy, A. Kucukural and Y. Zhang, *Nat. Protoc.*, 2010, **5**, 725.
- [4] Y. Li, N. M. Llewellyn, R. Giri, F. Huang and J. B. Spencer, *Chem. Biol.*, 2005, **12**, 665.
- [5] H. B. Dixon and K. F. Geoghegan, *Anal. Biochem.*, 1999, **267**, 169.
- [6] M. M. Bradford, *Anal. Biochem.*, 1976, **72**, 248.
- [7] I. H. Gilbert, M. Ginty, J. A. O'Neill, T. J. Simpson, J. Staunton and C. L. Willis, *Bioorg. Med. Chem. Lett.*, 1995, **5**, 1587.
- [8] S. K. Piasecki, C. A. Taylor, J. F. Detelich, J. Liu, J. Zheng, A. Komsoukianants, D. R. Siegel and A. T. Keatinge-Clay, *Chem. Biol.*, 2011, **18**, 1331.
- [9] S. Mo *et al.*, *J. Am. Chem. Soc.*, 2011, **133**, 976.
- [10] O. Vergnolle, F. Hahn, A. Baerga-Ortiz, P. F. Leadlay and J. N. Anderson, *ChemBioChem*, 2011, **12**, 1011.
- [11] G. Prasad, L. S. Borketey, T.-Y. Lin and N. A. Schnarr, *Org. Biomol. Chem.*, 2012, **10**, 6717.
- [12] B. D. Ames, *et al. Proc. Natl. Acad. Sci.*, 2012, **109**, 11144.
- [13] R. C. Harris, A. L. Cutter, K. J. Weissman, U. Hanefeld, M. C. Timoney and J. Staunton, *J. Chem. Res. Synop.* 1998, **6**, 283.
- [14] M. Jenner, S. Frank, A. Kampa, C. Kohlhaas, P. Pöplau, G. S. Briggs, J. Piel and N. J. Oldham, *Angew. Chem. Int. Ed.* 2013, **52**, 1143.
- [15] M. Jenner, J. P. Afonso, H. R. Bailey, S. Frank, A. Kampa, J. Piel and N. J. Oldham, *Angew. Chem. Int. Ed Engl.*, 2015, **54**, 1817.
- [16] W. Cao and E. M. De La Cruz, *Sci. Rep.*, 2013, **3**, 2658.
- [17] S. Dutta *et al.*, *Nature*, 2014, **510**, 512.
- [18] F. Sievers *et al.*, *Mol. Syst. Biol.*, 2011, **7**, 539.
